# Supplementary material
Source: publisher figshare collection journal article supplement (https://acs.figshare.com/ndownloader/files/20785119)
Supplement: Supplementary file 1 [file 20785119]

## Sheet: (-) polarity ions of interest
	Molecular Formula	m/z	Possible Ions (Lipid Maps Identifications)	LipidMaps Categories
1	C16H28O2	251.202	, , , , , , , , 4Z,7Z-Hexadecadienoic acid, , , , , , , , , , , , , , , , , , , , , , Palmitolinoleic acid, Hydnocarpic acid, , , , , , 7,10-hexadecadienoic acid, 7Z,10Z-hexadecadienoic acid, , , , , , , , ,	Fatty Acyls	LipidMaps Categories
2	C16H30O2	253.217	, Vittatalactone, , , , , cis-10-palmitoleic acid, , , , Lycopodic acid, cis-Palmitvaccenic acid, , Citronellyl hexanoate, 16:1(5Z), , , , , 15:1(4)(13Me), 8Z-Hexadecenoic acid, Sapienic acid, 6E-Hexadecenoic acid, , 16:1(4), , 7Z-palmitoleic acid, Hypogeic acid, , , , trans-9-palmitoleic acid, cis-9-palmitoleic acid, , , , , , , , , , , , , 6,7-methylene-pentadecanoic acid, , , delta-hexadecalac…	Fatty Acyls	Fatty Acyls
3	C15H28O3	255.197	14-keto pentadecanoic acid, 4-keto pentadecanoic acid, 11-keto pentadecanoic acid	Fatty Acyls	Glycerolipids
4	C16H32O2	255.233	2-hydroxyhexadecanal, Methyl 2,6,10-trimethyl-dodecanoate, Palmitic acid(d3), Palmitic acid, , , , Dodecyl 2-methylpropanoate, , Butyl dodecanoate, 14:0(10Me,13Me), , , , , , , AnteisohexaÂ­decanoic acid, , , Isopalmitic acid	Fatty Acyls	Glycerophospholipids
5	C14H26O4	257.176	, , Tetradecanedioic acid, Diisobutyl adipate, , DIBUTYL ADIPATE	Fatty Acyls	Sphingolipids
6	C16H22O3	261.15	Acutifolane A	Prenol Lipids	Sterol Lipids
7	C18H30O	261.222	5-(1-hydroxypropan-2-yl)isolongifol-4-ene, 5-(2-methoxyethyl)isolongifol-5-ene, 5-(1-hydroxypropan-2-yl)isolongifol-5-ene, , ,	Prenol Lipids / Fatty Acyls	Prenol Lipids
8	C17H30O2	265.217	Methyl 7Z,11Z-Hexadecadienoate, , , , , , , 9,12-Heptadecadienoic acid, , , , , , Norlinoleic acid	Fatty Acyls	Saccharolipids
9	C17H32O2	267.233	, 16:1(9Z)(15Me), , , , , 15-methyl-11Z-hexadecenoic acid, 15-methyl-11-Hexadecenoic acid, 16:1(6Z)(15Me), , , 7R,8S-methylenehexanoic acid, 7,8-methylenehexanoic acid, Methyl 7Z-hexadecenoate, Methyl 7E-hexadecenoate, , , 2-heptadecylenic acid, , , , , , , 9-methyl-10Z-hexadecenoic acid, , Methyl 9Z-hexadecenoate, , 16:1(8Z)(15Me), 17:1(11Z), 11-Heptadecenoic acid, , , , cis-9,10-methylene-hexad…	Fatty Acyls	Polyketides
10	C16H30O3	269.212	, 11-keto palmitic acid, 3-keto palmitic acid, 7-keto palmitic acid, 4-keto palmitic acid, , , 9-keto palmitic acid, Ambrettolic acid, , , , 8-keto palmitic acid, , 10-keto palmitic acid, , 5-keto palmitic acid, 2-keto palmitic acid	Fatty Acyls
11	C17H34O2	269.249	, , Methyl 2,6,10-trimethyl-tridecanoate, 14:0(5Me[R],9Me[R],13Me), , , , , Methyl hexadecanoate, 3-Methylbutyl dodecanoate, , , Anteisoheptadecanoic acid, Methyl 2,6-dimethyl-tetradecanoate, , Nonyl octanoate, Isoheptadecanoic acid, , , Margaric acid(d3), Margaric acid, , , , , , , , , , , ,	Fatty Acyls/ Prenol Lipids
12	C16H32O3	271.228	3S-hydroxypalmitic acid, 3R-hydroxypalmitic acid, , , , , 2S-hydroxypalmitic acid, 2R-hydroxypalmitic acid, 2-hydroxy palmitic acid, , 14-hydroxy palmitic acid, , 8-Hydroxypalmitic acid, , , Kerrolic acid, Juniperic acid, , , Jalapinolic acid, 11-hydroxy palmitic acid	Fatty Acyls
13	C17H24O3	275.165	Sugeonyl acetate, Ginsenoyne K, Panaquinquecol 2, Ginsenoyne C, Panaquinquecol 7	Sterol Lipids/Fatty Acyls
14	C18H28O2	275.202	, , , , , , , 5E,9Z,12Z,15Z-Octadecatetraenoic acid, Coniferonic acid, 8E,10E-Octadecadien-12-ynoic acid, Ixoric acid, , , , 14,15-Dehydrocrepenynic acid, , , , , beta-parinaric acid, 9Z,11Z,13Z,15Z-octadecatetraenoic acid, cis-parinaric acid, Heisteric acid, , , Stearidonic acid, , , , , , , , , , , , , , , , , , , , 11E,17-Octadecadien-9-ynoic acid, , , ,	Fatty Acyls
15	C16H22O4	277.144	alhpa-tocopheronolactone, Emmotin A	Prenol Lipids/Sterol Lipids
16	C17H26O3	277.181	, Panaxytriol,	Fatty Acyls
17	C18H30O2	277.217	7E-Octadecen-9-ynoic acid, Punicic acid, 9E,11Z,13E-octadecatrienoic acid, beta-eleostearic acid, Catalpic acid, alpha-eleostearic acid, , , alpha-calendic acid, Jacaric acid, beta-calendic acid, , , Elaidolinolenic acid, , , , alpha-Linolenic acid, , 3Z,9Z,12Z-Octadecatrienoic acid, Caleic acid, , , 13-(2-Cyclopentenyl)-9Z-tridecenoic acid, , Columbinic acid, , Pinolenic acid, (R)-lamenallenic a…	Fatty Acyls
18	C18H32O2	279.233	, , , , , , , , , , , , , , , Taxoleic acid, , , , , , , , , , Mikusch's acid, , 10Z,12E-Octadecadienoic acid, , , Ephedrenic acid, Tariric acid, 7-trans,9-cis-octadecadienoic acid, , , , Vaccelenic acid, , 4R-methyl-7Z,11Z-heptadecadienoic acid, Malvalic acid, , , , , 16:2(2E,4E)(5Me,7Me[S]), Rumenic acid, Ricinenic acid, 11-cis-Linoleic acid, Mangold's acid,	Fatty Acyls
19	C18H34O2	281.249	Thalictric acid, , 18:1(13E), , , , Petroselaidic acid, Petroselinic acid, , 3-octadecylenic acid, , , , , , Dihydromalvalic acid, Cyclopentanetridecanoic acid, , , , 18:1(14Z), 18:1(14E), , , Methyl 14-methyl-8Z-hexadecenoate, Methyl 14-methyl-8E-hexadecenoate, , , trans-2-oleic acid, , , 4-octadecylenic acid, , , 17:1(4)(15Me), cis-12-oleic acid, trans-12-elaidic acid, , , 17:1(6)(9Me), 17:1(12…	Fatty Acyls
20	C18H36O2	283.264	, , , , , , neostearic acid, 14-Methylheptadecanoic acid, , Methyl heptadecanoate, , lambda isostearic acid, , , , , , , , Stearic acid(d3), Stearic acid, , , , Isostearic acid,	Fatty Acyls
21	C16H30O4	285.207	Thapsic acid, ,	Fatty Acyls
22	C19H30O2	289.217	16:4(2E,4E,8E,10E)(7Me[R],9Me,14Me[R]), 4-Androstenediol, Sterculynic acid, , , 5alpha-dihydrotesosterone, 5beta-Dihydrotestosterone, Androstenediol, , Androsterone, Epiandrosterone, Epietiocholanolone,	Sterol Lipids/Fatty Acyls
23	C18H28O3	291.197	6-Hydroxyoctadeca-7,9-diynoic acid, , , , beta-Licanic acid, alpha-Licanic acid, , 12-Keto-9Z,13Z,15Z-octadecatrienoic acid, Colnelenic acid, , 12-oxo-PDA, Panaquinquecol 1, Etherolenic acid, 12,13S-EOT	Fatty Acyls
24	C18H30O3	293.212	9-hydroxy-10-Octadecen-12-ynoic acid, Helenynolic acid, alpha-12(13)-EpODE, (9R,13R)-10,11-dihydro-12-oxo-15-phytoenoic acid, (9S,13S)-10,11-dihydro-12-oxo-15-phytoenoic acid, 13-Hydroxy-3E,9Z,11E-octadecatrienoic acid, (9S,13S)-15,16-dihydro-12-oxo-10-phytoenoic acid, (9R,13R)-15,16-dihydro-12-oxo-10-phytoenoic acid, Colneleic acid, 15R,16S-epoxy-9Z,12E-octadienoic acid, alpha-15(16)-EpODE, 13S-…	Fatty Acyls
25	C18H32O3	295.228	2-hydroxy-9Z,12Z-Octadecadienoic acid, 2R-hydroxy-linoleic acid, 9-oxo-12Z-Octadecenoic acid, 12,13-EpOME(9), 12(13)-EpOME, 12S,13R-EpOME, 9,10-EpOME(12), 9R,10S-EpOME, 9(10)-EpOME, Coriolic acid, 13S-HODE, alpha-artemisic acid, 13R-HODE, 13R-HODE, 13S-HODE-(d4), 12-OxoOME(10E), 12-OxoOME(10Z), 10-keto-12Z-octadecenoic acid, , , , 8-hydroxy-11Z,14Z-Octadecadienoic acid, 13-keto-9Z-octadecenoic ac…	Fatty Acyls
26	C19H36O2	295.264	18:1(12E)(11Me), 11-methyl-12Z-octadecenoic acid, , , 19:1(6Z), 19:1(13Z), 18:1(7Z)(17Me), Lactobacillic acid, , , 19:1(11Z), , , , , 8,9-Methylene-octadecanoic acid, 5Z-Nonadecenoic acid, Dihydrosterculic acid, 2-octyl-cyclopropaneoctanoic acid, , , , methyl oleate, 10-methyl-9Z-octadecenoic acid, , 19:1(12Z), , 18:1(13Z)(17Me), , 19:1(16Z), 19:1(9Z)	Fatty Acyls
27	C18H34O3	297.243	10-keto stearic acid, Isoricinoleic acid, 9R-HOME(12E), 9R-HOME(12Z), 9-HOME(12), Isoricinoleic Acid, , , 13-HpOME(14E), 9R,10S-epoxy-stearic acid, 9S,10R-epoxy-stearic acid, 9,10-epoxystearic acid, 2R-hydroxy-oleic acid, 2-Hydroxyoleic acid, 8R-HOME(9Z), 8-HOME(9), , 13R-HOME(11E), 13S-HOME(11E), 9-hydroxy-11Z-Octadecenoic acid, 9-keto stearic acid, 12-HOME(10E), 12R-HOME(10E), 12S-HOME(10E), 19…	Fatty Acyls
28	C19H38O2	297.28	, Tuberculostearic acid, 10-methyl-octadecanoic acid, , , , , , , , , Methyl octadecanoate, Nonadecylic acid, , , , , Pristanic acid, Anteisononadecanoic acid, , , , , , Isononadecanoic acid	Fatty Acyls/Prenol Lipids
29	C20H28O2	299.202	Dysokusone D, (-)-Spruceanol, 20,14-retro-retinoic acid, Dehydroabietic acid, , , , (3S)-11-cis-3-hydroxyretinal, (3S)-all-trans-3-hydroxyretinal, (3R)-all-trans-3-hydroxyretinal, , 9,13-di-cis-retinoic acid, 11-cis-Retinoic acid, 13-cis-retinoic acid,Isotretinoin, Retinoic Acid, 9-cis-retinoic acid, Methandrostenolone,	Prenol Lipids/Sterol Lipids
30	C18H36O3	299.259	DL-7-hydroxy stearic acid, 15-hydroxy stearic acid, DL-11-hydroxy stearic acid, 17-hydroxy stearic acid, , 16-hydroxy stearic acid, 2-hydroxystearate, 2R-hydroxy-stearic acid, DL-2-hydroxy stearic acid, 14-hydroxy stearic acid, DL-6-hydroxy stearic acid, , DL-13-hydroxy stearic acid, , (R)-10-hydroxystearic acid, Rosilic acid, (S)-3-hydroxystearic acid, , DL-3-hydroxy stearic acid, , , DL-9-hydro…	Fatty Acyls
31	C20H30O2	301.217	Methenolone, (-)-Sacculatal, 17-Methyltestosterone, , Stenbolone, , , 5Z,8Z,11E,14Z,17Z-eicosapentaenoic acid, EPA, 5Z,8Z,11E,14Z,17E-eicosapentaenoic acid, EPA (d5), Neoabietic acid, 8,13-Abietadien-18-oic acid, , 9beta-pimara-7,15-dien-19-oic acid, isopimaric acid, ent-kaur-16-en-19-oic acid, (+)-12-Isocopalene-15,16-dial, Bosseopentaenoic acid, Abietic acid, , Magdalenic acid, Kempene 1, (+)-L…	Sterol Lipids/Prenol Lipids
32	C20H32O2	303.233	, , Isotrinervidiol, , 20:4(5Z,13Z,16Z,19Z), , (-)-Reiswigin A, , omega-3-Arachidonic acid, 7Z,11Z,14Z,17Z-Eicosatetraenoic acid, , Juniperonic acid, (-)-Cladielline, 17:4(2E,4E,9E,11E)(7Me[R],10Me,13Me[S]), 17:4(2E,4E,9E,11E)(8Me[R],10Me,15Me[R]), 16:3(2E,9E,11E)(3Me,5Me[S],7My,15Me), , , , , Mesterolone, , Taxa-4(20),11(12)-dien-5alpha,13alpha-diol, , Methandriol, Mestanolone, 16:3(2E,10E,12E)(…	Prenol Lipids/Sterol Lipids/Fatty Acyls
33	C20H34O2	305.249	, Bishomo-alpha-linolenic acid, , , 20:3(5Z,13Z,16Z), 2-Cyclopentene-1-pentadec-9c-enoic acid, 2-Cyclopentene-1-pentadecenoic acid, 9Z,11Z,14Z-Eicosatrienoic acid, bishomo-gamma-linolenic acid, 3Z,6Z,9Z-Eicosatrienoic acid, Oncobic acid, , , 5Z,9Z,12Z-Eicosatrienoic acid, eicosa-5Z,8Z,14Z-trienoic acid, Sciadonic acid, 5E,11Z,14Z-Eicosatrienoic acid, , Bishomocolumbinic acid, Bishomopinolenic aci…	Fatty Acyls
34	C18H28O4	307.191	ent-9-B1-PhytoP, 9-B1-PhytoP, ent-9-L1-PhytoP, 9-L1-PhytoP, ent-16-B1-PhytoP, 16-B1-PhytoP	Fatty Acyls
35	C20H36O2	307.264	, 20:2(5Z,9Z), 6-Eicosynoic acid, , , Phlomic acid, 20:2(6,11), , Hormelic acid, 20:2(7Z,14Z), Dihomotaxoleic acid, , , , 6Z,9Z-Eicosadienoic acid, , Keteleeronic acid, 5E,11Z-Eicosadienoic acid, 11,13-Eicosadienoic acid, 20:2(5Z,13Z), , , , , 20:2(5Z,15Z), , Dihomolinoleic acid, , , sclareol,	Fatty Acyls/Prenol Lipids
36	C17H26O5	309.171	, Botrydial	Prenol Lipids
37	C18H30O4	309.207	, 12-HpOTrE, 13S-HpOTrE(gamma), 9H-12(13)-EpODE, 15,16-EpODE, , , 16-HpOTrE, 9S-HpOTrE, 9-HpOTrE, 13S-HpOTrE, 13S-HpOTrE, 13-HpOTrE, 7S,8S-DiHOTrE	Fatty Acyls
38	C20H38O2	309.28	cis-gondoic acid, trans-gondoic acid, , , , , , 20:1(7Z), , , , cis-Gadoleic acid, Gadelaidic acid, Ethyl oleate, 16Z-eicosenoic acid, , , , , 10Z-Eicosenoic acid, , Paullinic acid, 6Z-Eicosenoic acid, 2E-Phytenoic acid, 2Z-Phytenoic Acid, 2E-Phytenic acid, Prostanoic acid skeleton, , , 3E-Eicosenoic acid,	Fatty Acyls
39	C18H32O4	311.223	Dihydroxychaulmoogric acid, , , 5S,8R-DiHODE, 10-oxo-13-hydroxy-11-octadecenoic acid, , , 8,13-DiHODE, , 13S-HpODE, E,E-13-HpODE, E,E-9-HpODE, 9S-HpODE, , , alpha-15,16-DiHODE, , 7S,8S-DiHODE, 9,14-DiHODE, 8R,11S-DiHODE, 11S-HpODE, alpha-9,10-DiHODE, 8R-HpODE, 8-HpODE, alpha-12,13-DiHODE, , gamma- 12,13-DiHODE, , 12-HpODE, , 14-HpODE, , gamma- 9,10-DiHODE, , , gamma- 6,7-DiHODE, 10R-HpODE, 10S-Hp…	Fatty Acyls
40	C20H40O2	311.296	, , , , , 2,11-dimethylstearic acid, , Ethyl stearate, , , , , , , 19:0(11Me), 3D,7D,11D-Phytanic acid, Phytanic acid, , , Isoarachidic acid, Arachidic acid(d3), Arachidic acid, , ,	Fatty Acyls/Prenol Lipids
41	C18H34O4	313.238	Octadecanedioic acid, 10-Hydroxy-9-ketooctadecanoic acid, 12,13-Dihydroxyoleic acid, 12,13-DiHOME(9), 12,13-DiHOME, 12,13 diHOME-(d4), 9,13-DiHOME(10), 9-HpOME, 12S-HpOME(13E), 12R-HpOME(13Z), 12S-HpOME(13Z), 12R-HpOME(13E), 9,13-DiHOME(11), 8R,11S-DiHOME, 12-HpOME(10E), 14R-HpOME(12E), 14S-HpOME(12E), 10-HpOME, 10S-HpOME, 6-HpOME(7E), 13R-HpOME(11E), 13S-HpOME(11E), 7,10-dihydroxy-8E-octadecenoi…	Fatty Acyls
42	C20H28O3	315.197	2-Methoxyestradiol-3-methylether, 15-deoxy-delta-12,14-PGA2, Lagaspholones A, preclavulone lactone II, preclavulone lactone I, Periconicin A, Cyrneine A, ent-8-deoxy-J2-IsoP, 8-deoxy-J2-IsoP, all-trans-5,6-Epoxyretinoic acid, all-trans-4-hydroxyretinoic acid, 9-cis-4-hydroxyretinoic acid, 19-Hydroxy-all-trans-retinoic acid, 19-Hydroxy-13-cis-retinoic acid, (-)-Cleistanthol, 3beta-hydroxy-9beta-pi…	Sterol Lipids/Prenol Lipids/Fatty Acyls
43	C20H30O3	317.212	4,5-LTA4, (+/-)-5-HEPE, 5S-HEPE, 17(18)-EpETE, 17R,18S-EpETE, 12-oxo-ETE, , 11R-HEPE, 11S-HEPE, (+/-)-11-HEPE, (+)-7beta-Hydroxy-15-beyeren-19-oic acid, ent-7alpha-hydroxykaur-16-en-19-oic acid, 15d-PGA1, 1alpha-hydroxy-20-oxo-19,22,23,24,25,26,27-heptanorvitamin D3 / 1alpha-hydroxy-20-oxo-19,22,23,24,25,26,27-heptanorcholecalciferol, 18S-HEPE, 18S-HEPE, 18R-HEPE, (+/-)-18-HEPE, 12R-HEPE, (+/-)-1…	Fatty Acyls
44	C20H32O3	319.228	1(15),8(19)-Trinervitadiene-3alpha,5alpha,18-triol, (+/-)8,9-EpETrE-(d8), 8R,9S-EpETrE, (+/-)8,9-EpETrE, 8S,9R-EpETrE, 11,12-Epoxyeicosatrienoic acid, (+/-)11,12-EpETrE-d8, 11,12-EpETrE, (+/-)11,12-EpETrE, 11S,12R-EpETrE, 11R,12S-EpETrE, , 11-HETE, , 11R-HETE, 11S-HETE, (-)-16alpha,17-Dihydroxy-atisan-3-one, , (+)-Beyerol, 3R-HETE, (+/-)14,15-EpETrE-(d8), (+/-)14,15-EpETrE, 14S,15R-EpETrE, 14R,15…	Fatty Acyls
45	C20H34O3	321.243	, 15S-HETrE, 15-HETrE, (+)-Villanovane-13alpha,19-diol, 5S-HETrE, 5-HETrE, (-)-Spongiane-15,16-diol, (-)-2,7-Dolabelladiene-6beta,10alpha,18-triol, , 12R-HETrE, 8S-HETrE, 8-HETrE, 8(S)-HETrE, 17(18)-Epoxy-11Z,14Z-Eicosadienoic acid	Fatty Acyls/Prenol Lipids
46	C18H30O5	325.202	9-epi-9-D1t-PhytoP, 9-D1t-PhytoP, 9-D1c-PhytoP, 2,3-dinor-PGE1, 2,3-Dinor-8-iso-PGF2alpha, 2,3-dinor-11b-PGF2alpha, Dinor-PGF2alpha, 2R-HpOTrE, (9Z,11E)-12-((3S,5S)-5-((S)-1-hydroxypropyl)-1,2-dioxolan-3-yl)dodeca-9,11-dienoic acid, (9Z,11E)-12-((3S,5R)-5-((R)-1-hydroxypropyl)-1,2-dioxolan-3-yl)dodeca-9,11-dienoic acid, 9K,12,13-diHODE	Fatty Acyls
47	C18H32O5	327.218	9-F1c-PhytoP, 9-epi-9-F1t-PhytoP, 9-F1t-PhytoP, 9-F1-PhytoP, , , Fulgidic acid, 9R,12R,13S-Trihydroxy-10E,15Z-octadecadienoic acid, 9R,12S,13S-Trihydroxy-10E,15Z-octadecadienoic acid, 9,12,13,TriHODE, Malyngic acid, , ent-16-F1t-PhytoP, ent-16-epi-16-F1t-PhytoP, 16-F1-PhytoP, ,	Fatty Acyls
48	C22H32O2	327.233	, , DHA, DHA (d5), Retinol Acetate/All-trans-retinyl Acetate,	Fatty Acyls/Prenol Lipids
49	C18H34O5	329.233	, 5,8,12-Trihydroxy-9-octadecenoic acid, 5,8,12-TriHOME(9), 9,12,13-TriHOME(10), 9,12,13-TriHOME, Dihydromalyngic acid, 9,10,18-TriHOME(12Z), 9,10,18-TriHOME(12), 9,10,18-trihydroxy-12Z-octadecenoic acid, 9,10,13-TriHOME(11), 11,12,13-TriHOME	Fatty Acyls
50	C22H34O2	329.249	Taxa-4(20),11(12)-dien-5alpha-yl acetate, , 22:5(4Z,7Z,10Z,13Z,16Z), 1alpha-hydroxy-23,24,25,26,27-pentanorvitamin D3 / 1alpha-hydroxy-23,24,25,26,27-pentanorcholecalciferol, , Clupadonic acid, , Ethyl icosapentate, 22-hydroxy-23,24,25,26,27-pentanorvitamin D3 / 22-hydroxy-23,24,25,26,27-pentanorcholecalciferol, docosapentaenoic acid, DPA,	Prenol Lipids/Fatty Acyls/Sterol Lipids
51	C22H36O2	331.264	5Z,13Z,16Z,19Z-Docosatetraenoic acid, , , , Adrenic acid, Adrenic Acid, 22:4(7Z,13Z,16Z,19Z), 22:4(4Z,7Z,10Z,13E),	Fatty Acyls
52	C20H30O4	333.207	, LTB5, PGE2 1,15-lactone, 5-J2-IsoP, 5-epi-5-J2-IsoP, ent-5-epi-5-J2-IsoP, ent-5-J2-IsoP, bicyclo-PGE2, PGC2, 13,14-dihydro-15-keto-PGA2, 15S-HpEPE, 12S-HpEPE, 12,18-di-HEPE, 8-epi-8-J2-IsoP, ent-8-J2-IsoP, ent-8-epi-8-J2-IsoP, 8-J2-IsoP, Resolvin E2, 18S-Resolvin E2, 5-Oxo-6-trans-leukotriene B4, PGA2, ent-15-A2-IsoP, 15-epi-15-A2-IsoP, 5-trans-PGA2, 15-A2-IsoP, 8,15-diepi-15-A2-IsoP, 8-epi-15-…	Fatty Acyls
53	C22H38O2	333.28	3E,13Z,16Z-Docosatrienoic acid, 22:3(7Z,13Z,16Z), , Eranthic acid, , , Dihomo Mead's acid, , 10,13,16-Docosatrienoic acid, , DTrE, , , Dihomopinolenic acid, ,	Fatty Acyls
54	C20H32O4	335.223	10,11-dihydro-12-oxo-LTB4, (-)-Stolondiol, , 15S-HpETE, 15-epi-PGA1, 8-iso-PGA1, PGA1, 14,15-DiHETE, 11-deoxy-PGE2, 11,12-DiHETE, Hepoxilin B3, 14,15-HxB3 (13R), (+/-)11,12-Ep-15S-HETrE, 5S,11R-DiHETE, 5S-HpETE, 5-HPETE, PGF2alpha-1,11-lactone, 9-HpETE, 9S-HpETE, , 16beta,17-dihydroxy-ent-kaurane-19-oic acid, 8S,15S-DiHETE, 8,15-DiHETE, , 8,9-DiHETE, 11-HpETE, 11R-HpETE, PGC1, , 8R-HpETE, 8S-HpET…	Fatty Acyls/Prenol Lipids
55	C22H44O2	339.327	, , , , Isobehenic acid, , , , , , Behenic acid(d3), Behenic acid, Butyl octadecanoate, ,	Fatty Acyls
56	C21H34O4	349.238	13,14-dihydroxy-11-mulinen-20-oic acid, Tetrahydrocorticosterone, 5alpha-Tetrahydrocorticosterone, 11-deoxy-11-methylene-PGD2, Tetrahydrodeoxycortisol, 9-deoxy-9-methylene-PGE2	Prenol Lipids/Sterol Lipids/Fatty Acyls
57	C20H32O5	351.218	ent-15-epi-15-D2t-IsoP, 8,15-diepi-15-D2c-IsoP, PGD2-d4, 15-epi-15-D2c-IsoP, 15R-PGD2, 15-D2t-IsoP, 15-epi-15-D2t-IsoP, ent-15-D2c-IsoP, ent-8,15-diepi-15-D2c-IsoP, ent-8-epi-15-D2c-IsoP, PGD2, 15-D2c-IsoP, 8-epi-15-D2c-IsoP, ent-PGD2, ent-15-D2t-IsoP, ent-8,15-diepi-15-D2t-IsoP, ent-15-epi-15-D2c-IsoP, , 13,14-dihydro-15-keto-PGE2, 8-epi-8-iso-LGD2, 8-iso-LGD2, ent-8-epi-8-iso-LGD2, ent-8-iso-LG…	Fatty Acyls
58	C23H46O2	353.342	Isotricosanoic acid, , , , , , , , Tricosylic acid	Fatty Acyls
59	C24H36O2	355.264	(1S)-1-hydroxy-23,24-didehydro-25,26,27-trinorcalciol, chola-4,6-dien-24-oic acid, tetracosahexaenoic acid, , , , , THA,	Sterol Lipids/Fatty Acyls
60	C24H38O2	357.28	, , , , , , , , Bufanolide skeleton, , , , , , Hyrtial,	Sterol Lipids/Prenol Lipids
61	C21H30O5	361.202	18-Hydroxycorticosterone, , Cortisol, 20alpha-DHOPA, 11beta,20-Dihydroxy-3-oxopregn-4-en-21-oic acid, poststerone, 4,5beta-Dihydrocortisone, 4,5alpha-Dihydrocortisone, 1alpha,17alpha,21-trihydroxy-20-oxo-22,23,24,25,26,27-hexanorvitamin D3 / 1alpha,17alpha,21-trihydroxy-20-oxo-22,23,24,25,26,27-hexanorcholecalciferol	Sterol Lipids
62	C20H32O6	367.213	20-hydroxy-PGE2, 20-COOH-10,11-dihydro-LTB4, 15S-hydroperoxy-PGD2, 5(6)-Epoxy Prostaglandin E1, 8,15-diHPETE, 8S,15S-diHPETE, 5,12-diHPETE, D17,6-keto PGF1a, 11-dehydro-TXB2-d4, 11-Dehydro-thromboxane B2, 11-dehydro-TXB2, 20-hydroxy-PGD2, TXB3, Thromboxane B3, 5S,15S-diHPETE, 5,15-diHPETE, 15S-hydroperoxy-PGE2, 6-keto PGE1, PGG2, Rhodojaponin III, 19R-hydroxy-PGE2, 20-dihydroxyleukotriene B4	Fatty Acyls
63	C24H48O2	367.358	, Lauryl laurate, , , , , , Mycocerosic acid (C24), Mycosanoic acid (C24), , Lignoceric acid(d3), Lignoceric acid, , , , 4-Methyl-3-heptyl palmitate	Fatty Acyls
64	C25H50O2	381.374	, , Isopentacosanoic acid, Hyenic acid, , 24:0(17Me), 24:0(18Me), Mycocerosic acid (C25), Mycosanoic acid (C25)	Fatty Acyls
65	C20H32O7	383.207	20-Trihydroxy-leukotriene-B4	Fatty Acyls
66	C19H37O6P	391.225	CPA(16:0)	Glycerophospholipids
67	C26H52O2	395.389	26:0(18Me), Lauryl myristate, Myristyl laurate, Phthioic acid, 25:0(23Me), 26:0(18Me,24Me), 4-Methyl-3-heptyl stearate, 25:0(18Me), , Isocerotic acid, Cerotic acid(d3), Cerotic acid, , Mycosanoic acid (C26), Mycocerosic acid (C26)	Fatty Acyls
68	C21H39O6P	417.241	CPA(18:1(9Z))	Glycerophospholipids
69	C20H20O10	419.098	, , , , , 3-Demethyldigicitrin,	Polyketides
70	C21H41O6P	419.257	CPA(18:0)	Glycerophospholipids
71	C20H41O7P	423.252	PA(17:0/0:0)	Glycerophospholipids
72	C29H50O2	429.374	4beta-(hydroxymethyl)-4alpha-methyl-5alpha-cholest-7-en-3beta-ol, alpha-tocopherol, , Ikshusterol, , toxisterol3 B1/ (5E)-(10R)-10-ethoxy-10,19-dihydrovitamin D3 / (5E)-(10R)-10-ethoxy-10,19-dihydrocholecalciferol, toxisterol3 B2 / (5E)-(10S)-10-ethoxy-10,19-dihydrovitamin D3 / (5E)-(10S)-10-ethoxy-10,19-dihydrocholecalciferol, toxisterol3 B3 / (10R)-10-ethoxy-10,19-dihydrovitamin D3 / (10R)-10-e…	Sterol Lipids
73	C21H41O7P	435.252	PA(18:1(9Z)/0:0), lysophosphatidic acid, PA(0:0/18:1(9Z))	Glycerophospholipids
74	C21H43O7P	437.267	PA(18:0/0:0), LPA(0:0/18:0)	Glycerophospholipids
75	C22H45O7P	451.283	PA(19:0/0:0)	Glycerophospholipids
76	C21H44NO7P	452.278	LysoPE(0:0/16:0), PC(13:0/0:0), PE(16:0/0:0)	Glycerophospholipids
77	C23H41O7P	459.252	PA(20:3(8Z,11Z,14Z)/0:0)	Glycerophospholipids
78	C23H45O7P	463.283	PA(20:1(11Z)/0:0)	Glycerophospholipids
79	C27H46O4S	465.304	cholesterol sulfate	Sterol Lipids
80	C23H48NO7P	480.31	PE(18:0/0:0), LysoPE(0:0/18:0), PC(15:0/0:0)	Glycerophospholipids
81	C26H45NO6S	498.289	Taurodeoxycholic acid, Taurochenodeoxycholic acid, Tauroursodeoxycholic acid	Sterol Lipids
82	C26H43NO7S	512.269	Sulfoglycolithocholate, Sulfoglycolithocholic acid	Sterol Lipids
83	C26H45NO7S	514.284	Taurallocholic acid, Tauroursocholic acid, Taurocholic acid, Taurallocholic acid, Taurohyocholic acid, Tauro-b-muricholic acid	Sterol Lipids
84	C26H30O15	581.151	Okanin 4'-alpha-L-arabinofuranosyl-(1->4)-glucoside,	Polyketides
85	C27H53O12P	599.32	PI(18:0/0:0), 6-O-(1-O-stearoyl-sn-glycero-3-phosphono)-1D-myo-inositol	Glycerophospholipids
86	C17H27N3O17P2	606.074	UDP-GlcNAc	Saccharolipids
87	C29H49O12P	619.289	PI(20:4(5Z,8Z,11Z,14Z)/0:0)	Glycerophospholipids
88	C37H69O8P	671.466	PA(18:1(9Z)/16:1(9Z)), PA(14:0/20:2(11Z,14Z)), PA(14:1(9Z)/20:1(11Z)), PA(15:1(9Z)/19:1(9Z)), PA(16:1(9Z)/18:1(9Z)), PA(17:0/17:2(9Z,12Z)), PA(19:1(9Z)/15:1(9Z)), PA(20:2(11Z,14Z)/14:0), PA(17:2(9Z,12Z)/17:0), PA(17:1(9Z)/17:1(9Z)), PA(22:2(13Z,16Z)/12:0), PA(12:0/22:2(13Z,16Z)), PA(20:1(11Z)/14:1(9Z)), PA(16:0/18:2(9Z,12Z)), PA(18:2(9Z,12Z)/16:0)	Glycerophospholipids
89	C37H71O8P	673.481	PA(17:1(9Z)/17:0), PA(12:0/22:1(11Z)), PA(19:1(9Z)/15:0), PA(16:1(9Z)/18:0), PA(14:0/20:1(11Z)), PA(14:1(9Z)/20:0), PA(18:0/16:1(9Z)), PA(15:0/19:1(9Z)), PA(16:0/18:1(9Z)), PA(19:0/15:1(9Z)), PA(15:1(9Z)/19:0), PA(17:0/17:1(9Z)), PA(22:1(11Z)/12:0), PA(20:1(11Z)/14:0), PA(16:0/18:1(11Z)), PA(20:0/14:1(9Z)), PA(18:1(9Z)/16:0)	Glycerophospholipids
90	C38H71O8P	685.481	PA(13:0/22:2(13Z,16Z)), PA(17:0/18:2(9Z,12Z)), PA(15:1(9Z)/20:1(11Z)), PA(18:1(9Z)/17:1(9Z)), PA(17:2(9Z,12Z)/18:0), PA(19:1(9Z)/16:1(9Z)), PA(20:1(11Z)/15:1(9Z)), PA(20:2(11Z,14Z)/15:0), PA(18:2(9Z,12Z)/17:0), PA(18:0/17:2(9Z,12Z)), PA(17:1(9Z)/18:1(9Z)), PA(16:1(9Z)/19:1(9Z)), PA(22:2(13Z,16Z)/13:0), PA(15:0/20:2(11Z,14Z))	Glycerophospholipids
91	C45H66O5	685.484	DG(20:5(5Z,8Z,11Z,14Z,17Z)/22:6(4Z,7Z,10Z,13Z,16Z,19Z)/0:0)[iso2]	Glycerolipids
92	C39H69O8P	695.466	PA(20:4(5Z,8Z,11Z,14Z)/16:0), PA(18:4(6Z,9Z,12Z,15Z)/18:0), PA(14:0/22:4(7Z,10Z,13Z,16Z)), PA(16:1(9Z)/20:3(8Z,11Z,14Z)), PA(18:1(9Z)/18:3(9Z,12Z,15Z)), PA(18:0/18:4(6Z,9Z,12Z,15Z)), PA(18:1(9Z)/18:3(6Z,9Z,12Z)), PA(18:3(9Z,12Z,15Z)/18:1(9Z)), PA(22:4(7Z,10Z,13Z,16Z)/14:0), PA(20:3(8Z,11Z,14Z)/16:1(9Z)), PA(18:2(9Z,12Z)/18:2(9Z,12Z)), PA(18:3(6Z,9Z,12Z)/18:1(9Z)), PA(16:0/20:4(5Z,8Z,11Z,14Z))	Glycerophospholipids
93	C39H71O8P	697.481	PA(20:2(11Z,14Z)/16:1(9Z)), PA(16:0/20:3(8Z,11Z,14Z)), PA(18:2(9Z,12Z)/18:1(9Z)), PA(18:3(6Z,9Z,12Z)/18:0), PA(17:2(9Z,12Z)/19:1(9Z)), PA(19:1(9Z)/17:2(9Z,12Z)), PA(18:1(9Z)/18:2(9Z,12Z)), PA(16:1(9Z)/20:2(11Z,14Z)), PA(18:0/18:3(6Z,9Z,12Z)), PA(14:1(9Z)/22:2(13Z,16Z)), PA(20:3(8Z,11Z,14Z)/16:0), PA(18:0/18:3(9Z,12Z,15Z)), PA(18:3(9Z,12Z,15Z)/18:0), PA(22:2(13Z,16Z)/14:1(9Z))	Glycerophospholipids
94	C39H73O8P	699.497	PA(14:0/22:2(13Z,16Z)), PA(22:1(11Z)/14:1(9Z)), PA(17:2(9Z,12Z)/19:0), PA(16:0/20:2(11Z,14Z)), PA(18:1(9Z)/18:1(9Z)), PA(20:1(11Z)/16:1(9Z)), PA(20:2(11Z,14Z)/16:0), PA(14:1(9Z)/22:1(11Z)), PA(18:0/18:2(9Z,12Z)), PA(16:1(9Z)/20:1(11Z)), PA(19:0/17:2(9Z,12Z)), PA(19:1(9Z)/17:1(9Z)), PA(17:1(9Z)/19:1(9Z)), PA(18:2(9Z,12Z)/18:0), PA(22:2(13Z,16Z)/14:0)	Glycerophospholipids
95	C40H71O8P	709.481	PA(18:3(6Z,9Z,12Z)/19:1(9Z)), PA(20:3(8Z,11Z,14Z)/17:1(9Z)), PA(22:4(7Z,10Z,13Z,16Z)/15:0), PA(19:1(9Z)/18:3(6Z,9Z,12Z)), PA(17:2(9Z,12Z)/20:2(11Z,14Z)), PA(15:0/22:4(7Z,10Z,13Z,16Z)), PA(17:1(9Z)/20:3(8Z,11Z,14Z)), PA(18:3(9Z,12Z,15Z)/19:1(9Z)), PA(20:4(5Z,8Z,11Z,14Z)/17:0), PA(18:4(6Z,9Z,12Z,15Z)/19:0), PA(19:0/18:4(6Z,9Z,12Z,15Z)), PA(17:0/20:4(5Z,8Z,11Z,14Z)), PA(20:2(11Z,14Z)/17:2(9Z,12Z)), …	Glycerophospholipids
96	C40H75O8P	713.513	PA(15:0/22:2(13Z,16Z)), PA(17:2(9Z,12Z)/20:0), , PA(22:1(11Z)/15:1(9Z)), PA(15:1(9Z)/22:1(11Z)), PA(20:2(11Z,14Z)/17:0), PA(19:0/18:2(9Z,12Z)), PA(22:2(13Z,16Z)/15:0), PA(17:0/20:2(11Z,14Z)), PA(18:2(9Z,12Z)/19:0), PA(19:1(9Z)/18:1(9Z)), PA(17:1(9Z)/20:1(11Z)), PA(20:0/17:2(9Z,12Z)), PA(18:1(9Z)/19:1(9Z)), PA(20:1(11Z)/17:1(9Z))	Glycerophospholipids
97	C47H70O5	713.515	DG(22:5(7Z,10Z,13Z,16Z,19Z)/22:6(4Z,7Z,10Z,13Z,16Z,19Z)/0:0)[iso2]	Glycerolipids
98	C39H74NO8P	714.508	PE(19:1(9Z)/15:1(9Z)), PE(20:1(11Z)/14:1(9Z)), PC(14:1(9Z)/17:1(9Z)), PE(16:0(9Cp)/16:0(9Cp)), PE(16:0/18:2(9Z,12Z)), PC(15:1(9Z)/16:1(9Z)), PC(17:2(9Z,12Z)/14:0), PE(15:1(9Z)/19:1(9Z)), PC(17:1(9Z)/14:1(9Z)), PE(17:1(9Z)/17:1(9Z)), PE(22:2(13Z,16Z)/12:0), PE(20:2(11Z,14Z)/14:0), PE(16:1(9Z)/18:1(9Z)), PC(18:2(9Z,12Z)/13:0), PE(12:0/22:2(13Z,16Z)), PE(14:0/20:2(11Z,14Z)), PE(17:0/17:2(9Z,12Z)), P…	Glycerophospholipids
99	C41H69O8P	719.466	PA(20:3(8Z,11Z,14Z)/18:3(6Z,9Z,12Z)), PA(20:3(8Z,11Z,14Z)/18:3(9Z,12Z,15Z)), PA(18:3(6Z,9Z,12Z)/20:3(8Z,11Z,14Z)), PA(22:6(4Z,7Z,10Z,13Z,16Z,19Z)/16:0), PA(20:2(11Z,14Z)/18:4(6Z,9Z,12Z,15Z)), PA(18:2(9Z,12Z)/20:4(5Z,8Z,11Z,14Z)), PA(16:0/22:6(4Z,7Z,10Z,13Z,16Z,19Z)), PA(18:3(9Z,12Z,15Z)/20:3(8Z,11Z,14Z)), PA(18:1(9Z)/20:5(5Z,8Z,11Z,14Z,17Z)), PA(18:4(6Z,9Z,12Z,15Z)/20:2(11Z,14Z)), PA(20:4(5Z,8Z,1…	Glycerophospholipids
100	C41H71O8P	721.481	PA(18:4(6Z,9Z,12Z,15Z)/20:1(11Z)), PA(20:2(11Z,14Z)/18:3(6Z,9Z,12Z)), PA(18:3(9Z,12Z,15Z)/20:2(11Z,14Z)), PA(18:1(9Z)/20:4(5Z,8Z,11Z,14Z)), PA(18:0/20:5(5Z,8Z,11Z,14Z,17Z)), PA(22:4(7Z,10Z,13Z,16Z)/16:1(9Z)), PA(18:3(6Z,9Z,12Z)/20:2(11Z,14Z)), PA(20:5(5Z,8Z,11Z,14Z,17Z)/18:0), PA(20:3(8Z,11Z,14Z)/18:2(9Z,12Z)), PA(20:2(11Z,14Z)/18:3(9Z,12Z,15Z)), PA(16:1(9Z)/22:4(7Z,10Z,13Z,16Z)), PA(18:2(9Z,12Z)…	Glycerophospholipids
101	C41H74NO7P	722.513	PE(P-18:0/18:4(6Z,9Z,12Z,15Z)), PE(O-16:0/20:5(5Z,8Z,11Z,14Z,17Z)), PE(P-16:0/20:4(5Z,8Z,11Z,14Z))	Glycerophospholipids
102	C41H73O8P	723.497	PA(18:0/20:4(5Z,8Z,11Z,14Z)), PA(18:4(6Z,9Z,12Z,15Z)/20:0), PA(20:1(11Z)/18:3(6Z,9Z,12Z)), PA(18:3(6Z,9Z,12Z)/20:1(11Z)), PA(20:3(8Z,11Z,14Z)/18:1(9Z)), PA(18:1(9Z)/20:3(8Z,11Z,14Z)), PA(20:4(5Z,8Z,11Z,14Z)/18:0), PA(20:2(11Z,14Z)/18:2(9Z,12Z)), PA(22:4(7Z,10Z,13Z,16Z)/16:0), PA(20:1(11Z)/18:3(9Z,12Z,15Z)), PA(18:3(9Z,12Z,15Z)/20:1(11Z)), PA(20:0/18:4(6Z,9Z,12Z,15Z)), PA(16:0/22:4(7Z,10Z,13Z,16Z)…	Glycerophospholipids
103	C41H75O8P	725.513	PA(20:0/18:3(9Z,12Z,15Z)), PA(20:0/18:3(6Z,9Z,12Z)), PA(18:1(9Z)/20:2(11Z,14Z)), PA(16:1(9Z)/22:2(13Z,16Z)), PA(20:3(8Z,11Z,14Z)/18:0), PA(18:2(9Z,12Z)/20:1(11Z)), PA(20:2(11Z,14Z)/18:1(9Z)), PA(20:1(11Z)/18:2(9Z,12Z)), PA(22:2(13Z,16Z)/16:1(9Z)), PA(18:3(9Z,12Z,15Z)/20:0), PA(18:3(6Z,9Z,12Z)/20:0), PA(18:0/20:3(8Z,11Z,14Z))	Glycerophospholipids
104	C42H82NO6P	726.581	CerP(d18:1/24:1(15Z))	Sphingolipids
105	C41H74NO8P	738.508	PC(15:0/18:4(6Z,9Z,12Z,15Z)), PE(16:0/20:4(5Z,8Z,11Z,14Z)), PE(20:4(5Z,8Z,11Z,14Z)/16:0), PC(18:3(6Z,9Z,12Z)/15:1(9Z)), PC(18:4(6Z,9Z,12Z,15Z)/15:0), PE(14:0/22:4(7Z,10Z,13Z,16Z)), PE(18:0/18:4(6Z,9Z,12Z,15Z)), PE(P-16:0/20:4(5Z,8Z,10E,14Z)(12OH[S])), PE(16:1(9Z)/20:3(8Z,11Z,14Z)), PE(18:3(6Z,9Z,12Z)/18:1(9Z)), PE(18:1(9Z)/18:3(6Z,9Z,12Z)), PE(22:4(7Z,10Z,13Z,16Z)/14:0), PC(15:1(9Z)/18:3(9Z,12Z,1…	Glycerophospholipids
106	C41H78NO8P	742.539	PC(16:1(9Z)/17:1(9Z)), PE(17:2(9Z,12Z)/19:0), PC(17:1(9Z)/16:1(9Z)), PC(15:0/18:2(9Z,12Z)), PC(19:1(9Z)/14:1(9Z)), PE(18:2(9Z,12Z)/18:0), PE(19:0/17:2(9Z,12Z)), PC(18:1(9Z)/15:1(9Z)), PE(22:1(11Z)/14:1(9Z)), PE(17:1(9Z)/19:1(9Z)), PC(20:2(11Z,14Z)/13:0), PE(19:1(9Z)/17:1(9Z)), PE(18:1(9E)/18:1(9E)), PE(18:1(9Z)/18:1(9Z)), PC(15:1(9Z)/18:1(9Z)), PE(20:2(11Z,14Z)/16:0), PE(14:0/22:2(13Z,16Z)), PE(1…	Glycerophospholipids
107	C43H71O8P	745.481	PA(22:6(4Z,7Z,10Z,13Z,16Z,19Z)/18:1(9Z)), PA(18:3(6Z,9Z,12Z)/22:4(7Z,10Z,13Z,16Z)), PA(20:5(5Z,8Z,11Z,14Z,17Z)/20:2(11Z,14Z)), PA(22:4(7Z,10Z,13Z,16Z)/18:3(9Z,12Z,15Z)), PA(18:1(9Z)/22:6(4Z,7Z,10Z,13Z,16Z,19Z)), PA(22:4(7Z,10Z,13Z,16Z)/18:3(6Z,9Z,12Z)), PA(20:2(11Z,14Z)/20:5(5Z,8Z,11Z,14Z,17Z)), PA(20:3(8Z,11Z,14Z)/20:4(5Z,8Z,11Z,14Z)), PA(18:3(9Z,12Z,15Z)/22:4(7Z,10Z,13Z,16Z)), PA(20:4(5Z,8Z,11Z…	Glycerophospholipids
108	C40H75O10P	745.502	PG(15:1(9Z)/19:1(9Z)), PG(16:0/18:2(9Z,12Z)), PG(17:0/17:2(9Z,12Z)), PG(14:0/20:2(11Z,14Z)), LBPA(16:1(9Z)/18:1(9Z)), PG(18:2(9Z,12Z)/16:0), PG(17:1(9Z)/17:1(9Z)), PG(17:2(9Z,12Z)/17:0), PG(20:1(11Z)/14:1(9Z)), PG(19:1(9Z)/15:1(9Z)), PG(20:2(11Z,14Z)/14:0), PG(18:1(9Z)/16:1(9Z)), PG(22:2(13Z,16Z)/12:0), PG(12:0/22:2(13Z,16Z)), PG(16:1(9Z)/18:1(9Z)), PG(14:1(9Z)/20:1(11Z))	Glycerophospholipids
109	C43H73O8P	747.497	PA(18:4(6Z,9Z,12Z,15Z)/22:2(13Z,16Z)), PA(20:2(11Z,14Z)/20:4(5Z,8Z,11Z,14Z)), PA(22:6(4Z,7Z,10Z,13Z,16Z,19Z)/18:0), PA(20:4(5Z,8Z,11Z,14Z)/20:2(11Z,14Z)), PA(18:2(9Z,12Z)/22:4(7Z,10Z,13Z,16Z)), PA(20:5(5Z,8Z,11Z,14Z,17Z)/20:1(11Z)), PA(20:3(8Z,11Z,14Z)/20:3(8Z,11Z,14Z)), PA(22:2(13Z,16Z)/18:4(6Z,9Z,12Z,15Z)), PA(18:0/22:6(4Z,7Z,10Z,13Z,16Z,19Z)), PA(22:4(7Z,10Z,13Z,16Z)/18:2(9Z,12Z)), PA(20:1(11Z…	Glycerophospholipids
110	C40H77O10P	747.518	PG(16:0/18:1(11Z)), PG(15:1(9Z)/19:0), PG(14:0/20:1(11Z)), PG(18:1(9Z)/16:0), PG(12:0/22:1(11Z)), PG(18:0/16:1(9Z)), PG(20:1(11Z)/14:0), PG(17:1(9Z)/17:0), PG(16:0/18:1(9Z)), PG(16:0/18:1(9Z)), PG(14:1(9Z)/20:0), PG(20:0/14:1(9Z)), PG(22:1(11Z)/12:0), PG(19:1(9Z)/15:0), LBPA(16:0/18:1(9Z)), PG(17:0/17:1(9Z)), PG(16:1(9Z)/18:0), PG(19:0/15:1(9Z)), PG(15:0/19:1(9Z))	Glycerophospholipids
111	C43H75O8P	749.513	PA(18:3(9Z,12Z,15Z)/22:2(13Z,16Z)), PA(20:1(11Z)/20:4(5Z,8Z,11Z,14Z)), PA(18:4(6Z,9Z,12Z,15Z)/22:1(11Z)), PA(20:0/20:5(5Z,8Z,11Z,14Z,17Z)), PA(18:1(9Z)/22:4(7Z,10Z,13Z,16Z)), PA(22:2(13Z,16Z)/18:3(9Z,12Z,15Z)), PA(20:4(5Z,8Z,11Z,14Z)/20:1(11Z)), PA(22:2(13Z,16Z)/18:3(6Z,9Z,12Z)), PA(18:3(6Z,9Z,12Z)/22:2(13Z,16Z)), PA(20:5(5Z,8Z,11Z,14Z,17Z)/20:0), PA(22:4(7Z,10Z,13Z,16Z)/18:1(9Z)), PA(20:2(11Z,14…	Glycerophospholipids
112	C43H78NO7P	750.544	PE(O-16:0/22:5(7Z,10Z,13Z,16Z,19Z)), PE(O-16:0/22:5(4Z,7Z,10Z,13Z,16Z)), PE(P-20:0/18:4(6Z,9Z,12Z,15Z)), PE(O-18:0/20:5(5Z,8Z,11Z,14Z,17Z)), PE(P-16:0/22:4(7Z,10Z,13Z,16Z)), PE(P-18:0/20:4(5Z,8Z,11Z,14Z))	Glycerophospholipids
113	C44H86NO6P	754.612	CerP(d18:1/26:1(17Z))	Sphingolipids
114	C43H74NO8P	762.508	PE(18:1(9Z)/20:5(5Z,8Z,11Z,14Z,17Z)), PE(20:2(11Z,14Z)/18:4(6Z,9Z,12Z,15Z)), PE(22:6(4Z,7Z,10Z,13Z,16Z,19Z)/16:0), PC(22:6(4Z,7Z,10Z,13Z,16Z,19Z)/13:0), PE(20:3(8Z,11Z,14Z)/18:3(9Z,12Z,15Z)), PE(20:5(5Z,8Z,11Z,14Z,17Z)/18:1(9Z)), PC(13:0/22:6(4Z,7Z,10Z,13Z,16Z,19Z)), PC(15:1(9Z)/20:5(5Z,8Z,11Z,14Z,17Z)), PE(18:2(9Z,12Z)/20:4(5Z,8Z,11Z,14Z)), PE(18:4(6Z,9Z,12Z,15Z)/20:2(11Z,14Z)), PC(20:5(5Z,8Z,11…	Glycerophospholipids
115	C43H76NO8P	764.524	PC(18:3(6Z,9Z,12Z)/17:2(9Z,12Z)), PE(20:2(11Z,14Z)/18:3(9Z,12Z,15Z)), PE(P-18:1(9Z)/20:4(5Z,8Z,10E,14Z)(12OH[S])), PE(18:3(6Z,9Z,12Z)/20:2(11Z,14Z)), PE(18:3(9Z,12Z,15Z)/20:2(11Z,14Z)), PE(18:2(9Z,12Z)/20:3(8Z,11Z,14Z)), PE(20:3(8Z,11Z,14Z)/18:2(9Z,12Z)), PC(17:2(9Z,12Z)/18:3(9Z,12Z,15Z)), PC(17:2(9Z,12Z)/18:3(6Z,9Z,12Z)), PC(18:4(6Z,9Z,12Z,15Z)/17:1(9Z)), PE(P-18:1(9Z)/20:4(6E,8Z,11Z,14Z)(5OH[S]…	Glycerophospholipids
116	C43H78NO8P	766.539	PE(18:0/20:4(5Z,8Z,11Z,14Z)), PE(18:0/20:4(5E,8E,11E,14E)), PE(20:1(11Z)/18:3(6Z,9Z,12Z)), PC(18:3(6Z,9Z,12Z)/17:1(9Z)), PC(20:4(5Z,8Z,11Z,14Z)/15:0), PC(17:1(9Z)/18:3(6Z,9Z,12Z)), PE(20:3(8Z,11Z,14Z)/18:1(9Z)), PC(20:3(8Z,11Z,14Z)/15:1(9Z)), PE(20:4(5Z,8Z,11Z,14Z)/18:0), PC(18:2(9Z,12Z)/17:2(9Z,12Z)), PE(18:4(6Z,9Z,12Z,15Z)/20:0), PE(18:3(6Z,9Z,12Z)/20:1(11Z)), PE(22:4(7Z,10Z,13Z,16Z)/16:0), PC(…	Glycerophospholipids
117	C42H75O10P	769.502	PG(18:3(6Z,9Z,12Z)/18:1(9Z)), PG(18:2(9Z,12Z)/18:2(9Z,12Z)), PG(18:0/18:4(6Z,9Z,12Z,15Z)), PG(14:0/22:4(7Z,10Z,13Z,16Z)), PG(18:1(9Z)/18:3(6Z,9Z,12Z)), PG(16:0/20:4(5Z,8Z,11Z,14Z)), PG(20:3(8Z,11Z,14Z)/16:1(9Z)), PG(18:3(9Z,12Z,15Z)/18:1(9Z)), PG(20:4(5Z,8Z,11Z,14Z)/16:0), PG(18:4(6Z,9Z,12Z,15Z)/18:0), PG(18:1(9Z)/18:3(9Z,12Z,15Z)), PG(22:4(7Z,10Z,13Z,16Z)/14:0), PG(16:1(9Z)/20:3(8Z,11Z,14Z))	Glycerophospholipids
118	C43H82NO8P	770.57	PE(20:1(11Z)/18:1(9Z)), PE(22:1(11Z)/16:1(9Z)), PE(20:0/18:2(9Z,12Z)), PC(17:1(9Z)/18:1(9Z)), PE(18:2(9Z,12Z)/20:0), PC(13:0/22:2(13Z,16Z)), PE(20:2(11Z,14Z)/18:0), PE(16:1(9Z)/22:1(11Z)), PE(17:2(9Z,12Z)/21:0), PC(17:2(9Z,12Z)/18:0), PC(16:1(9Z)/19:1(9Z)), PE(20:2(5Z,8Z)/18:0), PC(20:2(11Z,14Z)/15:0), PC(18:2(9Z,12Z)/17:0), PC(18:1(9Z)/17:1(9Z)), PC(15:1(9Z)/20:1(11Z)), PE(16:0/22:2(13Z,16Z)), P…	Glycerophospholipids
119	C42H77O10P	771.518	PG(14:1(9Z)/22:2(13Z,16Z)), PG(18:0/18:3(6Z,9Z,12Z)), PG(22:2(13Z,16Z)/14:1(9Z)), PG(18:1(9Z)/18:2(9Z,12Z)), PG(20:2(11Z,14Z)/16:1(9Z)), PG(20:3(8Z,11Z,14Z)/16:0), PG(18:2(9Z,12Z)/18:1(9Z)), PG(18:0/18:3(9Z,12Z,15Z)), PG(16:1(9Z)/20:2(11Z,14Z)), PG(18:3(9Z,12Z,15Z)/18:0), PG(17:2(9Z,12Z)/19:1(9Z)), PG(16:0/20:3(8Z,11Z,14Z)), PG(19:1(9Z)/17:2(9Z,12Z)), PG(18:3(6Z,9Z,12Z)/18:0)	Glycerophospholipids
120	C45H75O8P	773.513	PA(20:3(8Z,11Z,14Z)/22:4(7Z,10Z,13Z,16Z)), PA(22:6(4Z,7Z,10Z,13Z,16Z,19Z)/20:1(11Z)), PA(22:2(13Z,16Z)/20:5(5Z,8Z,11Z,14Z,17Z)), PA(20:1(11Z)/22:6(4Z,7Z,10Z,13Z,16Z,19Z)), PA(22:4(7Z,10Z,13Z,16Z)/20:3(8Z,11Z,14Z)), PA(20:5(5Z,8Z,11Z,14Z,17Z)/22:2(13Z,16Z))	Glycerophospholipids
121	C42H79O10P	773.534	PG(17:2(9Z,12Z)/19:0), PG(14:1(9Z)/22:1(11Z)), PG(18:2(9Z,12Z)/18:0), PG(19:1(9Z)/17:1(9Z)), PG(19:0/17:2(9Z,12Z)), PG(18:1(9Z)/18:1(9Z)), PG(18:1(9E)/18:1(9E)), PG(18:0/18:2(9Z,12Z)), PG(20:2(11Z,14Z)/16:0), PG(16:0/20:2(11Z,14Z)), PG(22:1(11Z)/14:1(9Z)), PG(14:0/22:2(13Z,16Z)), PG(16:1(9Z)/20:1(11Z)), PG(17:1(9Z)/19:1(9Z)), PG(22:2(13Z,16Z)/14:0), PG(20:1(11Z)/16:1(9Z)), LBPA(18:1(9Z)/18:1(9Z))	Glycerophospholipids
122	C42H80NO10P	788.545	PS(18:0/18:1(9Z)), PS(20:0/16:1(9Z)), PS(22:0/14:1(9Z)), PS(22:1(11Z)/14:0), PS(20:1(11Z)/16:0), PS(16:1(9Z)/20:0), PS(17:0/19:1(9Z)), PS(14:1(9Z)/22:0), PS(21:0/15:1(9Z)), PS(19:0/17:1(9Z)), PS(16:0/20:1(11Z)), PS(19:1(9Z)/17:0), PS(14:0/22:1(11Z)), PS(15:1(9Z)/21:0), PS(17:1(9Z)/19:0), PS(18:1(9Z)/18:0)	Glycerophospholipids
123	C45H78NO8P	790.539	PE(22:6(4Z,7Z,10Z,13Z,16Z,19Z)/18:0), PC(17:2(9Z,12Z)/20:4(5Z,8Z,11Z,14Z)), PE(18:2(9Z,12Z)/22:4(7Z,10Z,13Z,16Z)), PE(22:4(7Z,10Z,13Z,16Z)/18:2(9Z,12Z)), PC(15:0/22:6(4Z,7Z,10Z,13Z,16Z,19Z)), PE(20:5(5Z,8Z,11Z,14Z,17Z)/20:1(11Z)), PC(22:6(4Z,7Z,10Z,13Z,16Z,19Z)/15:0), PE(20:2(11Z,14Z)/20:4(5Z,8Z,11Z,14Z)), PE(20:3(8Z,11Z,14Z)/20:3(8Z,11Z,14Z)), PE(20:1(11Z)/20:5(5Z,8Z,11Z,14Z,17Z)), PE(P-18:0/22:…	Glycerophospholipids
124	C45H80NO8P	792.555	PE(22:2(13Z,16Z)/18:3(6Z,9Z,12Z)), PE(20:4(5Z,8Z,11Z,14Z)/20:1(11Z)), PE(20:3(8Z,11Z,14Z)/20:2(11Z,14Z)), PE(22:1(11Z)/18:4(6Z,9Z,12Z,15Z)), PE(18:4(6Z,9Z,12Z,15Z)/22:1(11Z)), PE(18:3(6Z,9Z,12Z)/22:2(13Z,16Z)), PE(20:5(5Z,8Z,11Z,14Z,17Z)/20:0), PC(19:1(9Z)/18:4(6Z,9Z,12Z,15Z)), PC(17:1(9Z)/20:4(5Z,8Z,11Z,14Z)), PC(22:4(7Z,10Z,13Z,16Z)/15:1(9Z)), PE(18:1(9Z)/22:4(7Z,10Z,13Z,16Z)), PE(20:2(11Z,14Z)…	Glycerophospholipids
125	C45H82NO8P	794.57	PC(17:2(9Z,12Z)/20:2(11Z,14Z)), PC(19:1(9Z)/18:3(6Z,9Z,12Z)), PC(17:1(9Z)/20:3(8Z,11Z,14Z)), PE(20:0/20:4(5Z,8Z,11Z,14Z)), PE(20:3(8Z,11Z,14Z)/20:1(11Z)), PE(18:3(9Z,12Z,15Z)/22:1(11Z)), PC(19:0/18:4(6Z,9Z,12Z,15Z)), PC(18:4(6Z,9Z,12Z,15Z)/19:0), PE(20:1(11Z)/20:3(8Z,11Z,14Z)), PE(18:0/22:4(7Z,10Z,13Z,16Z)), PE(22:2(13Z,16Z)/18:2(9Z,12Z)), PE(22:1(11Z)/18:3(6Z,9Z,12Z)), PC(19:1(9Z)/18:3(9Z,12Z,15…	Glycerophospholipids
126	C44H78NO10P	810.529	PS(20:3(8Z,11Z,14Z)/18:1(9Z)), PS(18:1(9Z)/20:3(8Z,11Z,14Z)), PS(18:2(9Z,12Z)/20:2(11Z,14Z)), PS(18:4(6Z,9Z,12Z,15Z)/20:0), PS(20:0/18:4(6Z,9Z,12Z,15Z)), PS(20:2(11Z,14Z)/18:2(9Z,12Z)), PS(16:0/22:4(7Z,10Z,13Z,16Z)), PS(18:3(6Z,9Z,12Z)/20:1(11Z)), PS(18:3(9Z,12Z,15Z)/20:1(11Z)), PS(20:1(11Z)/18:3(9Z,12Z,15Z)), PS(20:1(11Z)/18:3(6Z,9Z,12Z)), PS(18:0/20:4(5Z,8Z,11Z,14Z)), PS(20:4(5Z,8Z,11Z,14Z)/18:…	Glycerophospholipids
127	C46H78NO10P	834.529	PS(22:4(7Z,10Z,13Z,16Z)/18:2(9Z,12Z)), PS(18:0/22:6(4Z,7Z,10Z,13Z,16Z,19Z)), PS(18:4(6Z,9Z,12Z,15Z)/22:2(13Z,16Z)), PS(18:2(9Z,12Z)/22:4(7Z,10Z,13Z,16Z)), PS(20:4(5Z,8Z,11Z,14Z)/20:2(11Z,14Z)), PS(20:5(5Z,8Z,11Z,14Z,17Z)/20:1(11Z)), PS(20:2(11Z,14Z)/20:4(5Z,8Z,11Z,14Z)), PS(22:2(13Z,16Z)/18:4(6Z,9Z,12Z,15Z)), PS(20:3(8Z,11Z,14Z)/20:3(8Z,11Z,14Z)), PS(20:1(11Z)/20:5(5Z,8Z,11Z,14Z,17Z)), PS(22:6(4Z…	Glycerophospholipids
128	C43H81O13P	835.534	PI(12:0/22:1(11Z)), PI(19:1(9Z)/15:0), PI(17:1(9Z)/17:0), PI(15:1(9Z)/19:0), PI(19:0/15:1(9Z)), PI(18:1(9Z)/16:0), PI(16:0/18:1(9Z)), PI(15:0/19:1(9Z)), PI(17:0/17:1(9Z)), PI(18:0/16:1(9Z)), PI(14:1(9Z)/20:0), PI(14:0/20:1(11Z)), PI(16:1(9Z)/18:0), PI(20:0/14:1(9Z)), PI(22:1(11Z)/12:0), PI(20:1(11Z)/14:0)	Glycerophospholipids
129	C45H79O13P	857.519	PI(18:3(9Z,12Z,15Z)/18:1(9Z)), PI(20:3(8Z,11Z,14Z)/16:1(9Z)), PI(18:1(9Z)/18:3(9Z,12Z,15Z)), PI(18:4(6Z,9Z,12Z,15Z)/18:0), PI(18:2(9Z,12Z)/18:2(9Z,12Z)), PI(16:0/20:4(5Z,8Z,11Z,14Z)), PI(18:0/18:4(6Z,9Z,12Z,15Z)), PI(18:1(9Z)/18:3(6Z,9Z,12Z)), PI(22:4(7Z,10Z,13Z,16Z)/14:0), PI(14:0/22:4(7Z,10Z,13Z,16Z)), PI(20:4(5Z,8Z,11Z,14Z)/16:0), PI(18:3(6Z,9Z,12Z)/18:1(9Z)), PI(16:1(9Z)/20:3(8Z,11Z,14Z))	Glycerophospholipids
130	C45H83O13P	861.55	PI(19:1(9Z)/17:1(9Z)), PI(18:2(9Z,12Z)/18:0), PI(16:1(9Z)/20:1(11Z)), PI(19:0/17:2(9Z,12Z)), PI(18:0/18:2(9Z,12Z)), PI(20:1(11Z)/16:1(9Z)), PI(17:1(9Z)/19:1(9Z)), PI(20:2(11Z,14Z)/16:0), PI(16:0/20:2(11Z,14Z)), PI(22:2(13Z,16Z)/14:0), PI(14:0/22:2(13Z,16Z)), PI(22:1(11Z)/14:1(9Z)), PI(17:2(9Z,12Z)/19:0), PI(14:1(9Z)/22:1(11Z))	Glycerophospholipids
131	C47H81O13P	883.534	PI(20:5(5Z,8Z,11Z,14Z,17Z)/18:0), PI(18:3(6Z,9Z,12Z)/20:2(11Z,14Z)), PI(18:4(6Z,9Z,12Z,15Z)/20:1(11Z)), PI(20:1(11Z)/18:4(6Z,9Z,12Z,15Z)), PI(22:4(7Z,10Z,13Z,16Z)/16:1(9Z)), PI(16:1(9Z)/22:4(7Z,10Z,13Z,16Z)), PI(20:2(11Z,14Z)/18:3(6Z,9Z,12Z)), PI(20:3(8Z,11Z,14Z)/18:2(9Z,12Z)), PI(18:1(9Z)/20:4(5Z,8Z,11Z,14Z)), PI(18:0/20:5(5Z,8Z,11Z,14Z,17Z)), PI(18:3(9Z,12Z,15Z)/20:2(11Z,14Z)), PI(20:4(5Z,8Z,11…	Glycerophospholipids
132	C47H83O13P	885.55	PI(18:3(6Z,9Z,12Z)/20:1(11Z)), PI(22:4(7Z,10Z,13Z,16Z)/16:0), PI(18:4(6Z,9Z,12Z,15Z)/20:0), PI(20:4(5Z,8Z,11Z,14Z)/18:0), PI(20:2(11Z,14Z)/18:2(9Z,12Z)), Glc-GP(18:0/20:4(5Z,8Z,11Z,14Z)), PI(18:3(9Z,12Z,15Z)/20:1(11Z)), PI(18:0/20:4(5Z,8Z,11Z,14Z)), PI(18:2(9Z,12Z)/20:2(11Z,14Z)), PI(20:3(8Z,11Z,14Z)/18:1(9Z)), PI(20:0/18:4(6Z,9Z,12Z,15Z)), PI(16:0/22:4(7Z,10Z,13Z,16Z)), PI(20:1(11Z)/18:3(6Z,9Z,1…	Glycerophospholipids
133	C49H85O13P	911.565	PI(22:2(13Z,16Z)/18:3(6Z,9Z,12Z)), PI(20:5(5Z,8Z,11Z,14Z,17Z)/20:0), PI(18:4(6Z,9Z,12Z,15Z)/22:1(11Z)), PI(20:3(8Z,11Z,14Z)/20:2(11Z,14Z)), PI(18:1(9Z)/22:4(7Z,10Z,13Z,16Z)), PI(18:3(6Z,9Z,12Z)/22:2(13Z,16Z)), PI(18:3(9Z,12Z,15Z)/22:2(13Z,16Z)), PI(22:4(7Z,10Z,13Z,16Z)/18:1(9Z)), PI(20:1(11Z)/20:4(5Z,8Z,11Z,14Z)), PI(22:2(13Z,16Z)/18:3(9Z,12Z,15Z)), PI(20:4(5Z,8Z,11Z,14Z)/20:1(11Z)), PI(20:0/20:5…	Glycerophospholipids

## Sheet: (+) polarity ions of interest
	Molecular Formula	m/z	Possible Ions	LipidMaps Categories
1	C20H28	269.227	anhydroretinol	Prenol Lipids		LipidMaps Categories
2	C20H35NO2	322.274	Alpha-Linolenoyl ethanolamide	Fatty Acyls		Fatty Acyls			C57H100O6	M+K	919.715	TG(16:0/18:1(9Z)/20:4(5Z,8Z,11Z,14Z)), TG(16:1(9Z)/18:0/20:4(5Z,8Z,11Z,14Z)), TG(18:1(9Z)/18:2(9Z,12Z)/18:2(9Z,12Z)), TG(18:1(11Z)/16:0/20:4(5Z,8Z,11Z,14Z)), TG(18:1(9Z)/18:1(9Z)/18:3(6Z,9Z,12Z)), TG(18:1(9Z)/18:1(9Z)/18:3(9Z,12Z,15Z)), TG(18:2(9Z,12Z)/18:0/18:3(9Z,12Z,15Z)), TG(18:2(9Z,12Z)/18:1(11Z)/18:2(9Z,12Z)), Glycerol 1,2-di-(9Z,12Z-octadecadienoate) 3-(9Z-octadecenoate), Glycerol 1,3-di-(…
3	C21H40O3	323.295	Water loss of Oxoheneicosanoic acid or Glycidyl stearate	Fatty Acyls		Glycerolipids			C57H98O6	M+K	917.699	TG(16:0/18:2(9Z,12Z)/20:4(5Z,8Z,11Z,14Z)), TG(16:1(9Z)/18:1(9Z)/20:4(5Z,8Z,11Z,14Z)), TG(18:2(9Z,12Z)/18:2(9Z,12Z)/18:2(9Z,12Z)), TG(16:0/16:0/22:6(4Z,7Z,10Z,13Z,16Z,19Z)), TG(18:1(9Z)/16:0/20:5(5Z,8Z,11Z,14Z,17Z)), TG(18:2(9Z,12Z)/18:1(9Z)/18:3(6Z,9Z,12Z)), TG(18:2(9Z,12Z)/18:1(9Z)/18:3(9Z,12Z,15Z)), TG(18:3(9Z,12Z,15Z)/18:0/18:3(9Z,12Z,15Z)), TG(14:0/18:0/22:6(4Z,7Z,10Z,13Z,16Z,19Z)), TG(14:0/1…
4	C21H36O3	337.274	Pregnanetriol, 3-Methyl-5-pentyl-2-furanundecanoic acid, Isolinderanolide, 5-Hexyl-3,4-dimethyl-2-furannonanoic acid, 5-Butyl-3,4-dimethyl-2-furanundecanoic acid, 3,4-Dimethyl-5-propyl-2-furandodecanoic acid, 3-â€‹Methyl-â€‹5-â€‹propyl-2-â€‹furantridecanoic acid, 3,4-Dimethyl-5-pentyl-2-furandecanoic acid	Fatty Acyls		Glycerophospholipids			C55H102O6	M+K	897.731	TG(16:0/18:0/18:2(9Z,12Z)), TG(16:0/16:1(9Z)/20:1(11Z)), TG(16:0/18:1(9Z)/18:1(9Z)), TG(16:1(9Z)/18:0/18:1(9Z)), TG(16:1(9Z)/16:1(9Z)/20:0), TG(16:1(9Z)/18:0/18:1(11Z)), TG(18:1(11Z)/16:0/18:1(11Z)), TG(18:1(11Z)/16:0/18:1(9Z)), Glycerol 2,3-di-(9Z-octadecenoate) 1-hexadecanoate, TG(14:0/16:0/22:2(13Z,16Z)), TG(14:0/18:0/20:2n6), TG(14:0/20:0/18:2(9Z,12Z)), TG(14:0/14:1(9Z)/24:1(15Z)), TG(14:0/16…
5	C22H35NO2	346.274	Eicosapentaenoyl Ethanolamide	Fatty Acyls		Sphingolipids			C55H100O6	M+K	895.715	TG(16:0/18:1(9Z)/18:2(9Z,12Z)), TG(16:1(9Z)/18:0/18:2(9Z,12Z)), TG(16:1(9Z)/16:1(9Z)/20:1(11Z)), TG(16:1(9Z)/18:1(9Z)/18:1(9Z)), TG(18:0/16:0/18:3(9Z,12Z,15Z)), TG(18:1(11Z)/16:0/18:2(9Z,12Z)), TG(18:1(11Z)/16:1(9Z)/18:1(11Z)), TG(18:1(11Z)/16:1(9Z)/18:1(9Z)), TG(14:0/18:0/20:3(5Z,8Z,11Z)), TG(14:0/18:0/20:3n6), TG(14:0/20:0/18:3(6Z,9Z,12Z)), TG(14:0/20:0/18:3(9Z,12Z,15Z)), TG(14:0/16:1(9Z)/22:2(…
6	C22H37NO2	348.29	Anandamide, O-Arachidonoyl Ethanolamine	Fatty Acyls		Sterol Lipids			C55H98O6	M+K	893.699	TG(16:0/16:0/20:4(5Z,8Z,11Z,14Z)), TG(16:0/18:2(9Z,12Z)/18:2(9Z,12Z)), TG(16:1(9Z)/18:1(9Z)/18:2(9Z,12Z)), TG(18:1(11Z)/16:0/18:3(9Z,12Z,15Z)), TG(18:1(11Z)/16:1(9Z)/18:2(9Z,12Z)), TG(18:1(9Z)/16:0/18:3(9Z,12Z,15Z)), Glycerol 1,2-di-(9Z,12Z-octadecadienoate) 3-hexadecanoate, Glycerol 1,3-di-(9Z,12Z-octadecadienoate) 2-hexadecanoate, TG(14:0/16:0/22:4(7Z,10Z,13Z,16Z)), TG(14:0/18:0/20:4(5Z,8Z,11Z,…
7	C22H39NO2	350.306	Dihomo-gamma-Linolenoyl ethanolamide OR Water loss from 368.3161	Fatty Acyls		Prenol Lipids			C55H96O6	M+K	891.684	TG(16:0/16:1(9Z)/20:4(5Z,8Z,11Z,14Z)), TG(16:1(9Z)/18:2(9Z,12Z)/18:2(9Z,12Z)), TG(18:1(9Z)/14:0/20:4(5Z,8Z,11Z,14Z)), TG(18:2(9Z,12Z)/16:0/18:3(9Z,12Z,15Z)), TG(14:0/16:0/22:5(4Z,7Z,10Z,13Z,16Z)), TG(14:0/16:0/22:5(7Z,10Z,13Z,16Z,19Z)), TG(14:0/18:0/20:5(5Z,8Z,11Z,14Z,17Z)), TG(14:0/16:1(9Z)/22:4(7Z,10Z,13Z,16Z)), TG(14:0/18:1(11Z)/20:4(5Z,8Z,11Z,14Z)), TG(14:0/18:1(11Z)/20:4(8Z,11Z,14Z,17Z)), TG…
8	C21H27NO5	356.186	water loss of (Hydroxy-3-O-methyl-6B-naltrexol OR (S)-Autumnaline OR Hasubanonine OR Spirotetramat OR N-Jasmonoyltyrosine)	Fatty Acyls		Saccharolipids		Not Found in this list in Positive Mode	C57H100O6	M+H	881.759	TG(16:0/18:1(9Z)/20:4(5Z,8Z,11Z,14Z)), TG(16:1(9Z)/18:0/20:4(5Z,8Z,11Z,14Z)), TG(18:1(9Z)/18:2(9Z,12Z)/18:2(9Z,12Z)), TG(18:1(11Z)/16:0/20:4(5Z,8Z,11Z,14Z)), TG(18:1(9Z)/18:1(9Z)/18:3(6Z,9Z,12Z)), TG(18:1(9Z)/18:1(9Z)/18:3(9Z,12Z,15Z)), TG(18:2(9Z,12Z)/18:0/18:3(9Z,12Z,15Z)), TG(18:2(9Z,12Z)/18:1(11Z)/18:2(9Z,12Z)), Glycerol 1,2-di-(9Z,12Z-octadecadienoate) 3-(9Z-octadecenoate), Glycerol 1,3-di-(…
9	C21H27NO4	358.202	Nalbuphine, (S)-Laudanosine, 5-hydroxypropafenone	Other		Polyketides		Not Found in this list in Positive Mode	C57H98O6	M+H	879.744	TG(16:0/18:2(9Z,12Z)/20:4(5Z,8Z,11Z,14Z)), TG(16:1(9Z)/18:1(9Z)/20:4(5Z,8Z,11Z,14Z)), TG(18:2(9Z,12Z)/18:2(9Z,12Z)/18:2(9Z,12Z)), TG(16:0/16:0/22:6(4Z,7Z,10Z,13Z,16Z,19Z)), TG(18:1(9Z)/16:0/20:5(5Z,8Z,11Z,14Z,17Z)), TG(18:2(9Z,12Z)/18:1(9Z)/18:3(6Z,9Z,12Z)), TG(18:2(9Z,12Z)/18:1(9Z)/18:3(9Z,12Z,15Z)), TG(18:3(9Z,12Z,15Z)/18:0/18:3(9Z,12Z,15Z)), TG(14:0/18:0/22:6(4Z,7Z,10Z,13Z,16Z,19Z)), TG(14:0/1…
10	C27H46O	369.352	Cholesterol	Sterol Lipids					C55H100O6	M+Na	879.741	TG(16:0/18:1(9Z)/18:2(9Z,12Z)), TG(16:1(9Z)/18:0/18:2(9Z,12Z)), TG(16:1(9Z)/16:1(9Z)/20:1(11Z)), TG(16:1(9Z)/18:1(9Z)/18:1(9Z)), TG(18:0/16:0/18:3(9Z,12Z,15Z)), TG(18:1(11Z)/16:0/18:2(9Z,12Z)), TG(18:1(11Z)/16:1(9Z)/18:1(11Z)), TG(18:1(11Z)/16:1(9Z)/18:1(9Z)), TG(14:0/18:0/20:3(5Z,8Z,11Z)), TG(14:0/18:0/20:3n6), TG(14:0/20:0/18:3(6Z,9Z,12Z)), TG(14:0/20:0/18:3(9Z,12Z,15Z)), TG(14:0/16:1(9Z)/22:2(…
11	C21H41NO4	372.311	Tetradecanoylcarnitine	Fatty Acyls					C55H98O6	M+Na	877.726	TG(16:0/16:0/20:4(5Z,8Z,11Z,14Z)), TG(16:0/18:2(9Z,12Z)/18:2(9Z,12Z)), TG(16:1(9Z)/18:1(9Z)/18:2(9Z,12Z)), TG(18:1(11Z)/16:0/18:3(9Z,12Z,15Z)), TG(18:1(11Z)/16:1(9Z)/18:2(9Z,12Z)), TG(18:1(9Z)/16:0/18:3(9Z,12Z,15Z)), Glycerol 1,2-di-(9Z,12Z-octadecadienoate) 3-hexadecanoate, Glycerol 1,3-di-(9Z,12Z-octadecadienoate) 2-hexadecanoate, TG(14:0/16:0/22:4(7Z,10Z,13Z,16Z)), TG(14:0/18:0/20:4(5Z,8Z,11Z,…
12	C23H43NO5	396.311	water loss from N-stearoyl glutamic acid	Fatty Acyls					C48H84NO8P	M+K	872.557	PC(18:0/22:6(4Z,7Z,10Z,13Z,16Z,19Z)), PC(18:1(11Z)/22:5(4Z,7Z,10Z,13Z,16Z)), PC(18:1(11Z)/22:5(7Z,10Z,13Z,16Z,19Z)), PC(18:1(9Z)/22:5(4Z,7Z,10Z,13Z,16Z)), PC(18:1(9Z)/22:5(7Z,10Z,13Z,16Z,19Z)), PC(18:2(9Z,12Z)/22:4(7Z,10Z,13Z,16Z)), PC(18:4(6Z,9Z,12Z,15Z)/22:2(13Z,16Z)), PC(20:1(11Z)/20:5(5Z,8Z,11Z,14Z,17Z)), PC(20:2(11Z,14Z)/20:4(5Z,8Z,11Z,14Z)), PC(20:2(11Z,14Z)/20:4(8Z,11Z,14Z,17Z)), PC(20:3(5…
13	C23H43NO4	398.327	9-Hexadecenoylcarnitine, trans-Hexadec-2-enoyl carnitine	Fatty Acyls					C53H96O6	M+K	867.684	TG(16:0/16:1(9Z)/18:2(9Z,12Z)), TG(16:1(9Z)/16:1(9Z)/18:1(9Z)), TG(16:0/16:0/18:3(9Z,12Z,15Z)), TG(18:1(11Z)/14:0/18:2(9Z,12Z)), TG(18:1(9Z)/14:0/18:2(9Z,12Z)), 15-Oleoylsolamin, TG(14:0/16:0/20:3(5Z,8Z,11Z)), TG(14:0/16:0/20:3n6), TG(14:0/18:0/18:3(6Z,9Z,12Z)), TG(14:0/18:0/18:3(9Z,12Z,15Z)), TG(14:0/14:1(9Z)/22:2(13Z,16Z)), TG(14:0/16:1(9Z)/20:2n6), TG(14:0/18:1(11Z)/18:2(9Z,12Z)), TG(14:0/18:1…
14	C26H36N2O3	407.27	water loss from arachidonoyl m-Nitroaniline	Fatty Acyls					C55H102O6	M+H	859.775	TG(16:0/18:0/18:2(9Z,12Z)), TG(16:0/16:1(9Z)/20:1(11Z)), TG(16:0/18:1(9Z)/18:1(9Z)), TG(16:1(9Z)/18:0/18:1(9Z)), TG(16:1(9Z)/16:1(9Z)/20:0), TG(16:1(9Z)/18:0/18:1(11Z)), TG(18:1(11Z)/16:0/18:1(11Z)), TG(18:1(11Z)/16:0/18:1(9Z)), Glycerol 2,3-di-(9Z-octadecenoate) 1-hexadecanoate, TG(14:0/16:0/22:2(13Z,16Z)), TG(14:0/18:0/20:2n6), TG(14:0/20:0/18:2(9Z,12Z)), TG(14:0/14:1(9Z)/24:1(15Z)), TG(14:0/16…
15	C24H47NO4	414.358	Heptadecanoyl carnitine	Fatty Acyls					C50H84NO8P	M+H	858.601	PC(20:2(11Z,14Z)/22:6(4Z,7Z,10Z,13Z,16Z,19Z)), PC(20:3(5Z,8Z,11Z)/22:5(4Z,7Z,10Z,13Z,16Z)), PC(20:3(5Z,8Z,11Z)/22:5(7Z,10Z,13Z,16Z,19Z)), PC(20:3(8Z,11Z,14Z)/22:5(4Z,7Z,10Z,13Z,16Z)), PC(20:3(8Z,11Z,14Z)/22:5(7Z,10Z,13Z,16Z,19Z)), PC(20:4(5Z,8Z,11Z,14Z)/22:4(7Z,10Z,13Z,16Z)), PC(20:4(8Z,11Z,14Z,17Z)/22:4(7Z,10Z,13Z,16Z)), PC(22:4(7Z,10Z,13Z,16Z)/20:4(5Z,8Z,11Z,14Z)), PC(22:4(7Z,10Z,13Z,16Z)/20:4(…
16	C22H42O7	419.302	Palmitoyl glucuronide	Fatty Acyls					C55H100O6	M+H	857.759	TG(16:0/18:1(9Z)/18:2(9Z,12Z)), TG(16:1(9Z)/18:0/18:2(9Z,12Z)), TG(16:1(9Z)/16:1(9Z)/20:1(11Z)), TG(16:1(9Z)/18:1(9Z)/18:1(9Z)), TG(18:0/16:0/18:3(9Z,12Z,15Z)), TG(18:1(11Z)/16:0/18:2(9Z,12Z)), TG(18:1(11Z)/16:1(9Z)/18:1(11Z)), TG(18:1(11Z)/16:1(9Z)/18:1(9Z)), TG(14:0/18:0/20:3(5Z,8Z,11Z)), TG(14:0/18:0/20:3n6), TG(14:0/20:0/18:3(6Z,9Z,12Z)), TG(14:0/20:0/18:3(9Z,12Z,15Z)), TG(14:0/16:1(9Z)/22:2(…
17	C25H43NO4	422.321	Gamma-linolenyl carnitine, Alpha-linolenyl carnitine	Fatty Acyls					C55H98O6	M+H	855.744	TG(16:0/16:0/20:4(5Z,8Z,11Z,14Z)), TG(16:0/18:2(9Z,12Z)/18:2(9Z,12Z)), TG(16:1(9Z)/18:1(9Z)/18:2(9Z,12Z)), TG(18:1(11Z)/16:0/18:3(9Z,12Z,15Z)), TG(18:1(11Z)/16:1(9Z)/18:2(9Z,12Z)), TG(18:1(9Z)/16:0/18:3(9Z,12Z,15Z)), Glycerol 1,2-di-(9Z,12Z-octadecadienoate) 3-hexadecanoate, Glycerol 1,3-di-(9Z,12Z-octadecadienoate) 2-hexadecanoate, TG(14:0/16:0/22:4(7Z,10Z,13Z,16Z)), TG(14:0/18:0/20:4(5Z,8Z,11Z,…
18	C25H45NO4	424.342	Linoelaidyl carnitine, Linoleyl carnitine	Fatty Acyls					C55H96O6	M+H	853.728	TG(16:0/16:1(9Z)/20:4(5Z,8Z,11Z,14Z)), TG(16:1(9Z)/18:2(9Z,12Z)/18:2(9Z,12Z)), TG(18:1(9Z)/14:0/20:4(5Z,8Z,11Z,14Z)), TG(18:2(9Z,12Z)/16:0/18:3(9Z,12Z,15Z)), TG(14:0/16:0/22:5(4Z,7Z,10Z,13Z,16Z)), TG(14:0/16:0/22:5(7Z,10Z,13Z,16Z,19Z)), TG(14:0/18:0/20:5(5Z,8Z,11Z,14Z,17Z)), TG(14:0/16:1(9Z)/22:4(7Z,10Z,13Z,16Z)), TG(14:0/18:1(11Z)/20:4(5Z,8Z,11Z,14Z)), TG(14:0/18:1(11Z)/20:4(8Z,11Z,14Z,17Z)), TG…
19	C25H47NO4	426.358	Oleoylcarnitine, Vaccenyl carnitine, Elaidic carnitine, 11Z-Octadecenylcarnitine, Octadecenoylcarnitine	Fatty Acyls					C46H84NO8P	M+K	848.557	PC(16:0/22:4(7Z,10Z,13Z,16Z)), PC(18:0/20:4(5Z,8Z,11Z,14Z)), PC(18:0/20:4(8Z,11Z,14Z,17Z)), PC(18:1(11Z)/20:3(5Z,8Z,11Z)), PC(18:1(11Z)/20:3(8Z,11Z,14Z)), PC(18:1(9Z)/20:3(5Z,8Z,11Z)), PC(18:1(9Z)/20:3(8Z,11Z,14Z)), PC(18:2(9Z,12Z)/20:2(11Z,14Z)), PC(18:3(6Z,9Z,12Z)/20:1(11Z)), PC(18:3(9Z,12Z,15Z)/20:1(11Z)), PC(18:4(6Z,9Z,12Z,15Z)/20:0), PC(20:0/18:4(6Z,9Z,12Z,15Z)), PC(20:1(11Z)/18:3(6Z,9Z,12Z)…
20	C25H49NO4	428.374	Stearoylcarnitine, O-octadecanoyl-R-carnitine	Fatty Acyls					C49H84NO8P	M+H	846.601	PE(22:1(13Z)/22:6(4Z,7Z,10Z,13Z,16Z,19Z)), PE(22:2(13Z,16Z)/22:5(4Z,7Z,10Z,13Z,16Z)), PE(22:2(13Z,16Z)/22:5(7Z,10Z,13Z,16Z,19Z)), PE(22:5(4Z,7Z,10Z,13Z,16Z)/22:2(13Z,16Z)), PE(22:5(7Z,10Z,13Z,16Z,19Z)/22:2(13Z,16Z)), PE(22:6(4Z,7Z,10Z,13Z,16Z,19Z)/22:1(13Z)), PE-NMe2(20:1(11Z)/22:6(4Z,7Z,10Z,13Z,16Z,19Z)), PE-NMe2(20:2(11Z,14Z)/22:5(4Z,7Z,10Z,13Z,16Z)), PE-NMe2(20:2(11Z,14Z)/22:5(7Z,10Z,13Z,16Z,1…
21	C22H47N2O5P	433.318	water loss of C17 sphingosine-1-phosphocholine or SM(d17:1/0:0)	Sphingolipids					C46H82NO8P	M+K	846.541	PC(16:0/22:5(4Z,7Z,10Z,13Z,16Z)), PC(16:0/22:5(7Z,10Z,13Z,16Z,19Z)), PC(16:1(9Z)/22:4(7Z,10Z,13Z,16Z)), PC(18:0/20:5(5Z,8Z,11Z,14Z,17Z)), PC(18:1(11Z)/20:4(5Z,8Z,11Z,14Z)), PC(18:1(11Z)/20:4(8Z,11Z,14Z,17Z)), PC(18:1(9Z)/20:4(5Z,8Z,11Z,14Z)), PC(18:1(9Z)/20:4(8Z,11Z,14Z,17Z)), PC(18:2(9Z,12Z)/20:3(5Z,8Z,11Z)), PC(18:2(9Z,12Z)/20:3(8Z,11Z,14Z)), PC(18:3(6Z,9Z,12Z)/20:2(11Z,14Z)), PC(18:3(9Z,12Z,15…
22	C26H43NO4	434.327	Lithocholic acid glycine conjugate	Sterol Lipids					C49H82NO8P	M+H	844.585	PE(22:2(13Z,16Z)/22:6(4Z,7Z,10Z,13Z,16Z,19Z)), PE(22:4(7Z,10Z,13Z,16Z)/22:4(7Z,10Z,13Z,16Z)), PE(22:6(4Z,7Z,10Z,13Z,16Z,19Z)/22:2(13Z,16Z)), PE-NMe2(20:2(11Z,14Z)/22:6(4Z,7Z,10Z,13Z,16Z,19Z)), PE-NMe2(20:3(5Z,8Z,11Z)/22:5(4Z,7Z,10Z,13Z,16Z)), PE-NMe2(20:3(5Z,8Z,11Z)/22:5(7Z,10Z,13Z,16Z,19Z)), PE-NMe2(20:3(8Z,11Z,14Z)/22:5(4Z,7Z,10Z,13Z,16Z)), PE-NMe2(20:4(5Z,8Z,11Z,14Z)/22:4(7Z,10Z,13Z,16Z)), PE-…
23	C27H45NO4	448.343	N-Stearoyl tyrosine	Fatty Acyls					C46H80NO8P	M+K	844.525	PC(16:0/22:6(4Z,7Z,10Z,13Z,16Z,19Z)), PC(16:1(9Z)/22:5(4Z,7Z,10Z,13Z,16Z)), PC(16:1(9Z)/22:5(7Z,10Z,13Z,16Z,19Z)), PC(18:1(11Z)/20:5(5Z,8Z,11Z,14Z,17Z)), PC(18:1(9Z)/20:5(5Z,8Z,11Z,14Z,17Z)), PC(18:2(9Z,12Z)/20:4(5Z,8Z,11Z,14Z)), PC(18:2(9Z,12Z)/20:4(8Z,11Z,14Z,17Z)), PC(18:3(6Z,9Z,12Z)/20:3(5Z,8Z,11Z)), PC(18:3(6Z,9Z,12Z)/20:3(8Z,11Z,14Z)), PC(18:3(9Z,12Z,15Z)/20:3(5Z,8Z,11Z)), PC(18:3(9Z,12Z,15…
24	C25H47NO4	464.314	Oleoylcarnitine, Vaccenyl carnitine, Elaidic carnitine, 11Z-Octadecenylcarnitine, Octadecenoylcarnitine	Fatty Acyls					C44H84NO10P	M+Na	840.572	PS(14:0/24:1(15Z)), PS(14:1(9Z)/24:0), PS(16:0/22:1(13Z)), PS(16:1(9Z)/22:0), PS(18:0/20:1(11Z)), PS(18:1(11Z)/20:0), PS(18:1(9Z)/20:0), PS(20:0/18:1(11Z)), PS(20:0/18:1(9Z)), PS(20:1(11Z)/18:0), PS(22:0/16:1(9Z)), PS(22:1(13Z)/16:0), PS(24:0/14:1(9Z)), PS(24:1(15Z)/14:0)
25	C24H50NO7P	478.33	water loss from PC(16:0/0:0)[U] / PC(16:0/0:0)[rac], PC(O-14:0/2:0), PC(O-14:0/2:0)[U], PC(16:0/0:0), PC(16:0/0:0)[S], PC(16:0/0:0)[U], PC(0:0/16:0), PC(0:0/16:0)[U], LysoPC(16:0), PE(19:0/0:0), PC(16:0/0:0)	Glycerophospholipids					C48H86NO8P	M+H	836.616	PC(18:0/22:5(4Z,7Z,10Z,13Z,16Z)), PC(18:0/22:5(7Z,10Z,13Z,16Z,19Z)), PC(18:1(11Z)/22:4(7Z,10Z,13Z,16Z)), PC(18:1(9Z)/22:4(7Z,10Z,13Z,16Z)), PC(18:3(6Z,9Z,12Z)/22:2(13Z,16Z)), PC(18:3(9Z,12Z,15Z)/22:2(13Z,16Z)), PC(18:4(6Z,9Z,12Z,15Z)/22:1(13Z)), PC(20:0/20:5(5Z,8Z,11Z,14Z,17Z)), PC(20:1(11Z)/20:4(5Z,8Z,11Z,14Z)), PC(20:1(11Z)/20:4(8Z,11Z,14Z,17Z)), PC(20:2(11Z,14Z)/20:3(5Z,8Z,11Z)), PC(20:2(11Z,1…
26	C25H50NO7P	490.33	water loss from PC(17:1(10Z)/0:0), LysoPE(0:0/20:1(11Z)), LysoPE(20:1(11Z)/0:0), Gymnodimine, PC(17:1(9Z)/0:0), PE(20:1(11Z)/0:0)	Glycerophospholipids					C48H84NO8P	M+H	834.601	PC(18:0/22:6(4Z,7Z,10Z,13Z,16Z,19Z)), PC(18:1(11Z)/22:5(4Z,7Z,10Z,13Z,16Z)), PC(18:1(11Z)/22:5(7Z,10Z,13Z,16Z,19Z)), PC(18:1(9Z)/22:5(4Z,7Z,10Z,13Z,16Z)), PC(18:1(9Z)/22:5(7Z,10Z,13Z,16Z,19Z)), PC(18:2(9Z,12Z)/22:4(7Z,10Z,13Z,16Z)), PC(18:4(6Z,9Z,12Z,15Z)/22:2(13Z,16Z)), PC(20:1(11Z)/20:5(5Z,8Z,11Z,14Z,17Z)), PC(20:2(11Z,14Z)/20:4(5Z,8Z,11Z,14Z)), PC(20:2(11Z,14Z)/20:4(8Z,11Z,14Z,17Z)), PC(20:3(5…
27	C25H52NO7P	492.345	water loss from 1-heptadecanoyl-sn-glycero-3-phosphocholine, PC(O-1:0/16:0), PC(O-15:0/2:0), PC(O-15:0/2:0)[U], PC(O-16:0/1:0), PC(16:0/O-1:0)[U], PC(17:0/0:0), PC(17:0/0:0)[U], LysoPE(0:0/20:0), LysoPE(20:0/0:0), LysoPC(17:0), PC(16:0/O-1:0), PE(20:0/0:0)	Glycerophospholipids					C48H82NO8P	M+H	832.585	PC(18:1(11Z)/22:6(4Z,7Z,10Z,13Z,16Z,19Z)), PC(18:1(9Z)/22:6(4Z,7Z,10Z,13Z,16Z,19Z)), PC(18:2(9Z,12Z)/22:5(4Z,7Z,10Z,13Z,16Z)), PC(18:2(9Z,12Z)/22:5(7Z,10Z,13Z,16Z,19Z)), PC(18:3(6Z,9Z,12Z)/22:4(7Z,10Z,13Z,16Z)), PC(18:3(9Z,12Z,15Z)/22:4(7Z,10Z,13Z,16Z)), PC(20:2(11Z,14Z)/20:5(5Z,8Z,11Z,14Z,17Z)), PC(20:3(5Z,8Z,11Z)/20:4(5Z,8Z,11Z,14Z)), PC(20:3(5Z,8Z,11Z)/20:4(8Z,11Z,14Z,17Z)), PC(20:3(8Z,11Z,14Z…
28	C26H52NO6P	506.361	LysoPC(P-18:1(9Z))	Glycerophospholipids					C46H84NO8P	M+Na	832.583	PC(16:0/22:4(7Z,10Z,13Z,16Z)), PC(18:0/20:4(5Z,8Z,11Z,14Z)), PC(18:0/20:4(8Z,11Z,14Z,17Z)), PC(18:1(11Z)/20:3(5Z,8Z,11Z)), PC(18:1(11Z)/20:3(8Z,11Z,14Z)), PC(18:1(9Z)/20:3(5Z,8Z,11Z)), PC(18:1(9Z)/20:3(8Z,11Z,14Z)), PC(18:2(9Z,12Z)/20:2(11Z,14Z)), PC(18:3(6Z,9Z,12Z)/20:1(11Z)), PC(18:3(9Z,12Z,15Z)/20:1(11Z)), PC(18:4(6Z,9Z,12Z,15Z)/20:0), PC(20:0/18:4(6Z,9Z,12Z,15Z)), PC(20:1(11Z)/18:3(6Z,9Z,12Z)…
29	C34H67NO3	520.51	water loss from N-Palmitoylsphingosine, Cer(d18:1/16:0), Cer(d14:1/20:0), Cer(d16:1/18:0)	Sphingolipids					C48H80NO8P	M+H	830.569	PC(18:2(9Z,12Z)/22:6(4Z,7Z,10Z,13Z,16Z,19Z)), PC(18:3(6Z,9Z,12Z)/22:5(4Z,7Z,10Z,13Z,16Z)), PC(18:3(6Z,9Z,12Z)/22:5(7Z,10Z,13Z,16Z,19Z)), PC(18:3(9Z,12Z,15Z)/22:5(4Z,7Z,10Z,13Z,16Z)), PC(18:3(9Z,12Z,15Z)/22:5(7Z,10Z,13Z,16Z,19Z)), PC(18:4(6Z,9Z,12Z,15Z)/22:4(7Z,10Z,13Z,16Z)), PC(20:3(5Z,8Z,11Z)/20:5(5Z,8Z,11Z,14Z,17Z)), PC(20:3(8Z,11Z,14Z)/20:5(5Z,8Z,11Z,14Z,17Z)), PC(20:4(5Z,8Z,11Z,14Z)/20:4(5Z,8…
30	C39H72O5	603.535	water loss from1,2-Dioleoyl-sn-glycerol, DG(18:0/18:2(9Z,12Z)/0:0)[iso2], DG(16:1(9Z)/20:1(11Z)/0:0)[iso2], DG(16:0/20:2(11Z,14Z)/0:0)[iso2], DG(17:2(9Z,12Z)/19:0/0:0)[iso2], DG(14:0/22:2(13Z,16Z)/0:0), DG(14:1(9Z)/22:1(13Z)/0:0), DG(18:1(11Z)/18:1(11Z)/0:0), DG(18:1(11Z)/18:1(9Z)/0:0), DG(18:1(9Z)/18:1(11Z)/0:0), DG(18:2(9Z,12Z)/18:0/0:0), DG(20:1(11Z)/16:1(9Z)/0:0), DG(20:2(11Z,14Z)/16:0/0:0), …	Glycerolipids					C45H78NO8P	M+K	830.51	PC(15:0/22:6(4Z,7Z,10Z,13Z,16Z,19Z)), PC(22:6(4Z,7Z,10Z,13Z,16Z,19Z)/15:0), PE(18:0/22:6(4Z,7Z,10Z,13Z,16Z,19Z)), PE(18:1(11Z)/22:5(4Z,7Z,10Z,13Z,16Z)), PE(18:1(11Z)/22:5(7Z,10Z,13Z,16Z,19Z)), PE(18:1(9Z)/22:5(4Z,7Z,10Z,13Z,16Z)), PE(18:1(9Z)/22:5(7Z,10Z,13Z,16Z,19Z)), PE(18:2(9Z,12Z)/22:4(7Z,10Z,13Z,16Z)), PE(18:4(6Z,9Z,12Z,15Z)/22:2(13Z,16Z)), PE(20:1(11Z)/20:5(5Z,8Z,11Z,14Z,17Z)), PE(20:2(11Z,…
31	C40H79NO3	604.603	water loss from Ceramide (d18:1/22:0), Cer(d18:0/22:1(13Z)), Cer(d18:1/22:0), Cer(d14:1/26:0), Cer(d16:1/24:0)	Sphingolipids					C53H96O6	M+H	829.728	TG(16:0/16:1(9Z)/18:2(9Z,12Z)), TG(16:1(9Z)/16:1(9Z)/18:1(9Z)), TG(16:0/16:0/18:3(9Z,12Z,15Z)), TG(18:1(11Z)/14:0/18:2(9Z,12Z)), TG(18:1(9Z)/14:0/18:2(9Z,12Z)), 15-Oleoylsolamin, TG(14:0/16:0/20:3(5Z,8Z,11Z)), TG(14:0/16:0/20:3n6), TG(14:0/18:0/18:3(6Z,9Z,12Z)), TG(14:0/18:0/18:3(9Z,12Z,15Z)), TG(14:0/14:1(9Z)/22:2(13Z,16Z)), TG(14:0/16:1(9Z)/20:2n6), TG(14:0/18:1(11Z)/18:2(9Z,12Z)), TG(14:0/18:1…
32	C41H81NO3	618.619	water loss from Tricosanamide, Cer(d18:1/23:0)	Sphingolipids					C46H80NO8P	M+Na	828.551	PC(16:0/22:6(4Z,7Z,10Z,13Z,16Z,19Z)), PC(16:1(9Z)/22:5(4Z,7Z,10Z,13Z,16Z)), PC(16:1(9Z)/22:5(7Z,10Z,13Z,16Z,19Z)), PC(18:1(11Z)/20:5(5Z,8Z,11Z,14Z,17Z)), PC(18:1(9Z)/20:5(5Z,8Z,11Z,14Z,17Z)), PC(18:2(9Z,12Z)/20:4(5Z,8Z,11Z,14Z)), PC(18:2(9Z,12Z)/20:4(8Z,11Z,14Z,17Z)), PC(18:3(6Z,9Z,12Z)/20:3(5Z,8Z,11Z)), PC(18:3(6Z,9Z,12Z)/20:3(8Z,11Z,14Z)), PC(18:3(9Z,12Z,15Z)/20:3(5Z,8Z,11Z)), PC(18:3(9Z,12Z,15…
33	C41H72O5	627.536	water loss from 1-(9Z,12Z,15Z-octadecatrienoyl)-2-(11Z-eicosenoyl)-sn-glycerol, DG(18:2(9Z,12Z)/20:2(11Z,14Z)/0:0)[iso2], DG(18:1(9Z)/20:3(8Z,11Z,14Z)/0:0)[iso2], DG(18:0/20:4(5Z,8Z,11Z,14Z)/0:0)[iso2], DG(16:1(9Z)/22:3(10Z,13Z,16Z)/0:0)[iso2], DG(16:0/22:4(7Z,10Z,13Z,16Z)/0:0)[iso2], DG(18:0/20:4(8Z,11Z,14Z,17Z)/0:0), DG(18:1(11Z)/20:3(8Z,11Z,14Z)/0:0), DG(18:1(9Z)/20:3(5Z,8Z,11Z)/0:0), DG(18:3(…	Glycerolipids					C44H84NO8P	M+K	824.557	PC(18:1(9Z)/18:1(9Z)), PC(14:0/22:2(13Z,16Z)), PC(14:1(9Z)/22:1(13Z)), PC(16:0/20:2(11Z,14Z)), PC(16:1(9Z)/20:1(11Z)), PC(18:0/18:2(9Z,12Z)), PC(18:1(11Z)/18:1(11Z)), PC(18:1(11Z)/18:1(9Z)), PC(18:1(9Z)/18:1(11Z)), PC(18:2(9Z,12Z)/18:0), PC(20:1(11Z)/16:1(9Z)), PC(20:2(11Z,14Z)/16:0), PC(22:1(13Z)/14:1(9Z)), PC(22:2(13Z,16Z)/14:0), 1,2-dioleoyl-sn-glycero-3-phosphocholine, PE-NMe(14:1(9Z)/24:1(15…
34	C42H81NO3	630.619	water loss from Ceramide (d18:1/24:1(15Z)), Nervonic Ceramide, Cer(d18:1/24:1(15Z))	Sphingolipids					C47H84NO8P	M+H	822.601	PE(18:4(6Z,9Z,12Z,15Z)/24:1(15Z)), PE(20:0/22:5(4Z,7Z,10Z,13Z,16Z)), PE(20:0/22:5(7Z,10Z,13Z,16Z,19Z)), PE(20:1(11Z)/22:4(7Z,10Z,13Z,16Z)), PE(20:3(5Z,8Z,11Z)/22:2(13Z,16Z)), PE(20:3(8Z,11Z,14Z)/22:2(13Z,16Z)), PE(20:4(5Z,8Z,11Z,14Z)/22:1(13Z)), PE(20:4(8Z,11Z,14Z,17Z)/22:1(13Z)), PE(20:5(5Z,8Z,11Z,14Z,17Z)/22:0), PE(22:0/20:5(5Z,8Z,11Z,14Z,17Z)), PE(22:1(13Z)/20:4(5Z,8Z,11Z,14Z)), PE(22:1(13Z)/2…
35	C42H83NO3	632.635	water loss from Ceramide (d18:1/24:0), Cer(d18:0/24:1(15Z)), N-Lignoceroylsphingosine, Cer(d18:1/24:0)	Sphingolipids					C47H82NO8P	M+H	820.585	PE(20:0/22:6(4Z,7Z,10Z,13Z,16Z,19Z)), PE(20:1(11Z)/22:5(4Z,7Z,10Z,13Z,16Z)), PE(20:1(11Z)/22:5(7Z,10Z,13Z,16Z,19Z)), PE(20:2(11Z,14Z)/22:4(7Z,10Z,13Z,16Z)), PE(20:4(5Z,8Z,11Z,14Z)/22:2(13Z,16Z)), PE(20:4(8Z,11Z,14Z,17Z)/22:2(13Z,16Z)), PE(20:5(5Z,8Z,11Z,14Z,17Z)/22:1(13Z)), PE(22:1(13Z)/20:5(5Z,8Z,11Z,14Z,17Z)), PE(22:2(13Z,16Z)/20:4(5Z,8Z,11Z,14Z)), PE(22:2(13Z,16Z)/20:4(8Z,11Z,14Z,17Z)), PE(22:…
36	C41H72O5	683.502	DG(16:0/22:4(7Z,10Z,13Z,16Z)/0:0), DG(18:0/20:4(5Z,8Z,11Z,14Z)/0:0), DG(18:0/20:4(8Z,11Z,14Z,17Z)/0:0), DG(18:1(11Z)/20:3(8Z,11Z,14Z)/0:0), DG(18:1(9Z)/20:3(5Z,8Z,11Z)/0:0), DG(18:1(9Z)/20:3(8Z,11Z,14Z)/0:0), DG(18:2(9Z,12Z)/20:2(11Z,14Z)/0:0), DG(18:3(6Z,9Z,12Z)/20:1(11Z)/0:0), DG(18:3(9Z,12Z,15Z)/20:1(11Z)/0:0), DG(18:4(6Z,9Z,12Z,15Z)/20:0/0:0), DG(20:0/18:4(6Z,9Z,12Z,15Z)/0:0), DG(20:1(11Z)/18…	Glycerolipids					C44H80NO8P	M+K	820.525	PC(14:0/22:4(7Z,10Z,13Z,16Z)), PC(16:0/20:4(5Z,8Z,11Z,14Z)), PC(16:0/20:4(8Z,11Z,14Z,17Z)), PC(16:1(9Z)/20:3(5Z,8Z,11Z)), PC(16:1(9Z)/20:3(8Z,11Z,14Z)), PC(18:0/18:4(6Z,9Z,12Z,15Z)), PC(18:1(11Z)/18:3(6Z,9Z,12Z)), PC(18:1(11Z)/18:3(9Z,12Z,15Z)), PC(18:1(9Z)/18:3(6Z,9Z,12Z)), PC(18:1(9Z)/18:3(9Z,12Z,15Z)), PC(18:2(9Z,12Z)/18:2(9Z,12Z)), PC(18:3(6Z,9Z,12Z)/18:1(11Z)), PC(18:3(6Z,9Z,12Z)/18:1(9Z)), …
37	C39H74NO8P	716.523	PE(14:0/20:2(11Z,14Z)), PE(14:1(9Z)/20:1(11Z)), PE(16:0/18:2(9Z,12Z)), PE(16:1(9Z)/18:1(11Z)), PE(16:1(9Z)/18:1(9Z)), PE(18:1(11Z)/16:1(9Z)), PE(18:1(9Z)/16:1(9Z)), PE(18:2(9Z,12Z)/16:0), PE(20:1(11Z)/14:1(9Z)), PE(20:2(11Z,14Z)/14:0), PE-NMe(15:0/18:2(9Z,12Z)), PE-NMe(18:2(9Z,12Z)/15:0), PE-NMe2(14:1(9Z)/18:1(9Z)), PE-NMe2(14:1(9Z)/18:1(11Z)), PE-NMe2(16:1(9Z)/16:1(9Z)), PE-NMe2(14:0/18:2(9Z,12Z…	Glycerophospholipids					C44H84NO10P	M+H	818.591	PS(14:0/24:1(15Z)), PS(14:1(9Z)/24:0), PS(16:0/22:1(13Z)), PS(16:1(9Z)/22:0), PS(18:0/20:1(11Z)), PS(18:1(11Z)/20:0), PS(18:1(9Z)/20:0), PS(20:0/18:1(11Z)), PS(20:0/18:1(9Z)), PS(20:1(11Z)/18:0), PS(22:0/16:1(9Z)), PS(22:1(13Z)/16:0), PS(24:0/14:1(9Z)), PS(24:1(15Z)/14:0)
38	C39H76NO8P	718.54	PC(15:0/16:1(9Z)), PC(16:1(9Z)/15:0), PE(14:0/20:1(11Z)), PE(14:1(9Z)/20:0), PE(16:0/18:1(11Z)), PE(16:0/18:1(9Z)), PE(16:1(9Z)/18:0), PE(18:0/16:1(9Z)), PE(18:1(11Z)/16:0), PE(18:1(9Z)/16:0), PE(20:0/14:1(9Z)), PE(20:1(11Z)/14:0), PE-NMe(15:0/18:1(9Z)), PE-NMe(15:0/18:1(11Z)), PE-NMe(18:1(11Z)/15:0), PE-NMe(18:1(9Z)/15:0), PE-NMe2(16:0/16:1(9Z)), PE-NMe2(14:0/18:1(9Z)), PE-NMe2(14:0/18:1(11Z)), …	Glycerophospholipids					C47H80NO8P	M+H	818.569	PE(20:1(11Z)/22:6(4Z,7Z,10Z,13Z,16Z,19Z)), PE(20:2(11Z,14Z)/22:5(4Z,7Z,10Z,13Z,16Z)), PE(20:2(11Z,14Z)/22:5(7Z,10Z,13Z,16Z,19Z)), PE(20:3(5Z,8Z,11Z)/22:4(7Z,10Z,13Z,16Z)), PE(20:3(8Z,11Z,14Z)/22:4(7Z,10Z,13Z,16Z)), PE(20:5(5Z,8Z,11Z,14Z,17Z)/22:2(13Z,16Z)), PE(22:2(13Z,16Z)/20:5(5Z,8Z,11Z,14Z,17Z)), PE(22:4(7Z,10Z,13Z,16Z)/20:3(5Z,8Z,11Z)), PE(22:4(7Z,10Z,13Z,16Z)/20:3(8Z,11Z,14Z)), PE(22:5(4Z,7Z…
39	C40H76NO8P	730.539	PC(14:0/18:2(9Z,12Z)), PC(14:1(9Z)/18:1(11Z)), PC(14:1(9Z)/18:1(9Z)), PC(16:1(9Z)/16:1(9Z)), PC(18:1(11Z)/14:1(9Z)), PC(18:1(9Z)/14:1(9Z)), PC(18:2(9Z,12Z)/14:0), PE(15:0/20:2(11Z,14Z)), PE(20:2(11Z,14Z)/15:0), PE-NMe(14:1(9Z)/20:1(11Z)), PE-NMe(16:1(9Z)/18:1(9Z)), PE-NMe(16:1(9Z)/18:1(11Z)), PE-NMe(14:0/20:2(11Z,14Z)), PE-NMe(16:0/18:2(9Z,12Z)), PE-NMe(18:1(9Z)/16:1(9Z)), PE-NMe(18:1(11Z)/16:1(9…	Glycerophospholipids					C44H82NO10P	M+H	816.575	PS(14:1(9Z)/24:1(15Z)), PS(16:0/22:2(13Z,16Z)), PS(16:1(9Z)/22:1(13Z)), PS(18:0/20:2(11Z,14Z)), PS(18:1(11Z)/20:1(11Z)), PS(18:1(9Z)/20:1(11Z)), PS(18:2(9Z,12Z)/20:0), PS(20:0/18:2(9Z,12Z)), PS(20:1(11Z)/18:1(11Z)), PS(20:1(11Z)/18:1(9Z)), PS(20:2(11Z,14Z)/18:0), PS(22:1(13Z)/16:1(9Z)), PS(22:2(13Z,16Z)/16:0), PS(24:1(15Z)/14:1(9Z))
40	C39H71O8P	737.453	PA(14:1(9Z)/22:2(13Z,16Z)), PA(16:0/20:3(5Z,8Z,11Z)), PA(18:0/18:3(6Z,9Z,12Z)), PA(18:0/18:3(9Z,12Z,15Z)), PA(18:1(11Z)/18:2(9Z,12Z)), PA(18:1(9Z)/18:2(9Z,12Z)), PA(18:2(9Z,12Z)/18:1(11Z)), PA(18:2(9Z,12Z)/18:1(9Z)), PA(18:3(6Z,9Z,12Z)/18:0), PA(18:3(9Z,12Z,15Z)/18:0), PA(20:3(5Z,8Z,11Z)/16:0), PA(22:2(13Z,16Z)/14:1(9Z)), PA(16:0/20:3(8Z,11Z,14Z)), PA(16:1(9Z)/20:2(11Z,14Z)), PA(20:2(11Z,14Z)/16:…	Glycerophospholipids					C45H78NO8P	M+Na	814.536	PC(15:0/22:6(4Z,7Z,10Z,13Z,16Z,19Z)), PC(22:6(4Z,7Z,10Z,13Z,16Z,19Z)/15:0), PE(18:0/22:6(4Z,7Z,10Z,13Z,16Z,19Z)), PE(18:1(11Z)/22:5(4Z,7Z,10Z,13Z,16Z)), PE(18:1(11Z)/22:5(7Z,10Z,13Z,16Z,19Z)), PE(18:1(9Z)/22:5(4Z,7Z,10Z,13Z,16Z)), PE(18:1(9Z)/22:5(7Z,10Z,13Z,16Z,19Z)), PE(18:2(9Z,12Z)/22:4(7Z,10Z,13Z,16Z)), PE(18:4(6Z,9Z,12Z,15Z)/22:2(13Z,16Z)), PE(20:1(11Z)/20:5(5Z,8Z,11Z,14Z,17Z)), PE(20:2(11Z,…
41	C41H74NO8P	740.524	PC(15:0/18:4(6Z,9Z,12Z,15Z)), PC(18:4(6Z,9Z,12Z,15Z)/15:0), PE(14:0/22:4(7Z,10Z,13Z,16Z)), PE(16:0/20:4(5Z,8Z,11Z,14Z)), PE(16:0/20:4(8Z,11Z,14Z,17Z)), PE(16:1(9Z)/20:3(5Z,8Z,11Z)), PE(18:0/18:4(6Z,9Z,12Z,15Z)), PE(18:1(11Z)/18:3(6Z,9Z,12Z)), PE(18:1(11Z)/18:3(9Z,12Z,15Z)), PE(18:1(9Z)/18:3(6Z,9Z,12Z)), PE(18:1(9Z)/18:3(9Z,12Z,15Z)), PE(18:2(9Z,12Z)/18:2(9Z,12Z)), PE(18:3(6Z,9Z,12Z)/18:1(11Z)), P…	Glycerophospholipids					C45H75O8P	M+K	813.483	PA(20:1(11Z)/22:6(4Z,7Z,10Z,13Z,16Z,19Z)), PA(20:3(5Z,8Z,11Z)/22:4(7Z,10Z,13Z,16Z)), PA(20:5(5Z,8Z,11Z,14Z,17Z)/22:2(13Z,16Z)), PA(22:2(13Z,16Z)/20:5(5Z,8Z,11Z,14Z,17Z)), PA(22:4(7Z,10Z,13Z,16Z)/20:3(5Z,8Z,11Z)), PA(22:6(4Z,7Z,10Z,13Z,16Z,19Z)/20:1(11Z)), PA(20:2(11Z,14Z)/22:5(4Z,7Z,10Z,13Z,16Z)), PA(20:2(11Z,14Z)/22:5(7Z,10Z,13Z,16Z,19Z)), PA(20:3(8Z,11Z,14Z)/22:4(7Z,10Z,13Z,16Z)), PA(22:4(7Z,10…
42	C41H76NO8P	742.54	PC(15:0/18:3(6Z,9Z,12Z)), PC(15:0/18:3(9Z,12Z,15Z)), PC(18:3(6Z,9Z,12Z)/15:0), PC(18:3(9Z,12Z,15Z)/15:0), PE(14:1(9Z)/22:2(13Z,16Z)), PE(16:0/20:3(5Z,8Z,11Z)), PE(16:0/20:3(8Z,11Z,14Z)), PE(16:1(9Z)/20:2(11Z,14Z)), PE(18:0/18:3(6Z,9Z,12Z)), PE(18:0/18:3(9Z,12Z,15Z)), PE(18:1(11Z)/18:2(9Z,12Z)), PE(18:1(9Z)/18:2(9Z,12Z)), PE(18:2(9Z,12Z)/18:1(11Z)), PE(18:2(9Z,12Z)/18:1(9Z)), PE(18:3(6Z,9Z,12Z)/18…	Glycerophospholipids					C46H84NO8P	M+H	810.601	PC(16:0/22:4(7Z,10Z,13Z,16Z)), PC(18:0/20:4(5Z,8Z,11Z,14Z)), PC(18:0/20:4(8Z,11Z,14Z,17Z)), PC(18:1(11Z)/20:3(5Z,8Z,11Z)), PC(18:1(11Z)/20:3(8Z,11Z,14Z)), PC(18:1(9Z)/20:3(5Z,8Z,11Z)), PC(18:1(9Z)/20:3(8Z,11Z,14Z)), PC(18:2(9Z,12Z)/20:2(11Z,14Z)), PC(18:3(6Z,9Z,12Z)/20:1(11Z)), PC(18:3(9Z,12Z,15Z)/20:1(11Z)), PC(18:4(6Z,9Z,12Z,15Z)/20:0), PC(20:0/18:4(6Z,9Z,12Z,15Z)), PC(20:1(11Z)/18:3(6Z,9Z,12Z)…
43	C39H82N2O6P or C41H78NO8P	744.555	SM(d18:0/16:0) (PC VERY CLOSE BY) PC(15:0/18:2(9Z,12Z)), PC(18:2(9Z,12Z)/15:0), PE(14:0/22:2(13Z,16Z)), PE(14:1(9Z)/22:1(13Z)), PE(16:0/20:2(11Z,14Z)), PE(16:1(9Z)/20:1(11Z)), PE(18:0/18:2(9Z,12Z)), PE(18:1(11Z)/18:1(11Z)), PE(18:1(11Z)/18:1(9Z)), PE(18:1(9Z)/18:1(11Z)), PE(18:1(9Z)/18:1(9Z)), PE(18:2(9Z,12Z)/18:0), PE(20:1(11Z)/16:1(9Z)), PE(20:2(11Z,14Z)/16:0), PE(22:1(13Z)/14:1(9Z)), PE(22:2(1…	Sphingolipids/Glycerophospholipids					C46H82NO8P	M+H	808.585	PC(16:0/22:5(4Z,7Z,10Z,13Z,16Z)), PC(16:0/22:5(7Z,10Z,13Z,16Z,19Z)), PC(16:1(9Z)/22:4(7Z,10Z,13Z,16Z)), PC(18:0/20:5(5Z,8Z,11Z,14Z,17Z)), PC(18:1(11Z)/20:4(5Z,8Z,11Z,14Z)), PC(18:1(11Z)/20:4(8Z,11Z,14Z,17Z)), PC(18:1(9Z)/20:4(5Z,8Z,11Z,14Z)), PC(18:1(9Z)/20:4(8Z,11Z,14Z,17Z)), PC(18:2(9Z,12Z)/20:3(5Z,8Z,11Z)), PC(18:2(9Z,12Z)/20:3(8Z,11Z,14Z)), PC(18:3(6Z,9Z,12Z)/20:2(11Z,14Z)), PC(18:3(9Z,12Z,15…
44	C42H76NO8P	754.54	SM C16:1 (PC VERY CLOSE BY) PC(14:0/20:4(5Z,8Z,11Z,14Z)), PC(14:0/20:4(8Z,11Z,14Z,17Z)), PC(14:1(9Z)/20:3(5Z,8Z,11Z)), PC(14:1(9Z)/20:3(8Z,11Z,14Z)), PC(16:0/18:4(6Z,9Z,12Z,15Z)), PC(16:1(9Z)/18:3(6Z,9Z,12Z)), PC(16:1(9Z)/18:3(9Z,12Z,15Z)), PC(18:3(6Z,9Z,12Z)/16:1(9Z)), PC(18:3(9Z,12Z,15Z)/16:1(9Z)), PC(18:4(6Z,9Z,12Z,15Z)/16:0), PC(20:3(5Z,8Z,11Z)/14:1(9Z)), PC(20:3(8Z,11Z,14Z)/14:1(9Z)), PC(20:…	Sphingolipids/Glycerophospholipids					C46H80NO8P	M+H	806.569	PC(16:0/22:6(4Z,7Z,10Z,13Z,16Z,19Z)), PC(16:1(9Z)/22:5(4Z,7Z,10Z,13Z,16Z)), PC(16:1(9Z)/22:5(7Z,10Z,13Z,16Z,19Z)), PC(18:1(11Z)/20:5(5Z,8Z,11Z,14Z,17Z)), PC(18:1(9Z)/20:5(5Z,8Z,11Z,14Z,17Z)), PC(18:2(9Z,12Z)/20:4(5Z,8Z,11Z,14Z)), PC(18:2(9Z,12Z)/20:4(8Z,11Z,14Z,17Z)), PC(18:3(6Z,9Z,12Z)/20:3(5Z,8Z,11Z)), PC(18:3(6Z,9Z,12Z)/20:3(8Z,11Z,14Z)), PC(18:3(9Z,12Z,15Z)/20:3(5Z,8Z,11Z)), PC(18:3(9Z,12Z,15…
45	C42H78NO8P	756.556	PC(14:0/20:3(5Z,8Z,11Z)), PC(14:0/20:3(8Z,11Z,14Z)), PC(14:1(9Z)/20:2(11Z,14Z)), PC(16:0/18:3(6Z,9Z,12Z)), PC(16:0/18:3(9Z,12Z,15Z)), PC(16:1(9Z)/18:2(9Z,12Z)), PC(18:2(9Z,12Z)/16:1(9Z)), PC(18:3(6Z,9Z,12Z)/16:0), PC(18:3(9Z,12Z,15Z)/16:0), PC(20:2(11Z,14Z)/14:1(9Z)), PC(20:3(5Z,8Z,11Z)/14:0), PC(20:3(8Z,11Z,14Z)/14:0), PE-NMe(14:1(9Z)/22:2(13Z,16Z)), PE-NMe(16:0/20:3(5Z,8Z,11Z)), PE-NMe(16:0/20:…	Glycerophospholipids					C44H82NO8P	M+Na	806.567	PC(14:1(9Z)/22:2(13Z,16Z)), PC(16:0/20:3(5Z,8Z,11Z)), PC(16:0/20:3(8Z,11Z,14Z)), PC(16:1(9Z)/20:2(11Z,14Z)), PC(18:0/18:3(6Z,9Z,12Z)), PC(18:0/18:3(9Z,12Z,15Z)), PC(18:1(11Z)/18:2(9Z,12Z)), PC(18:1(9Z)/18:2(9Z,12Z)), PC(18:2(9Z,12Z)/18:1(11Z)), PC(18:2(9Z,12Z)/18:1(9Z)), PC(18:3(6Z,9Z,12Z)/18:0), PC(18:3(9Z,12Z,15Z)/18:0), PC(20:2(11Z,14Z)/16:1(9Z)), PC(20:3(5Z,8Z,11Z)/16:0), PC(20:3(8Z,11Z,14Z)/…
46	C42H80NO8P	758.571	PC(14:0/20:2(11Z,14Z)), PC(14:1(9Z)/20:1(11Z)), PC(16:0/18:2(9Z,12Z)), PC(16:1(9Z)/18:1(11Z)), PC(16:1(9Z)/18:1(9Z)), PC(18:1(11Z)/16:1(9Z)), PC(18:1(9Z)/16:1(9Z)), PC(18:2(9Z,12Z)/16:0), PC(20:1(11Z)/14:1(9Z)), PC(20:2(11Z,14Z)/14:0), PE(15:0/22:2(13Z,16Z)), PE(22:2(13Z,16Z)/15:0), PE-NMe(18:1(9Z)/18:1(9Z)), PE-NMe(16:1(9Z)/20:1(11Z)), PE-NMe(18:1(9Z)/18:1(11Z)), PE-NMe(18:1(11Z)/18:1(9Z)), PE-N…	Glycerophospholipids					C43H78NO8P	M+K	806.51	PC(15:0/20:4(5Z,8Z,11Z,14Z)), PC(15:0/20:4(8Z,11Z,14Z,17Z)), PC(20:4(5Z,8Z,11Z,14Z)/15:0), PC(20:4(8Z,11Z,14Z,17Z)/15:0), PE(16:0/22:4(7Z,10Z,13Z,16Z)), PE(16:1(9Z)/20:3(8Z,11Z,14Z)), PE(18:0/20:4(5Z,8Z,11Z,14Z)), PE(18:0/20:4(8Z,11Z,14Z,17Z)), PE(18:1(11Z)/20:3(5Z,8Z,11Z)), PE(18:1(11Z)/20:3(8Z,11Z,14Z)), PE(18:1(9Z)/20:3(5Z,8Z,11Z)), PE(18:1(9Z)/20:3(8Z,11Z,14Z)), PE(18:2(9Z,12Z)/20:2(11Z,14Z))…
47	C41H71O8P	761.453	PA(16:0/22:5(4Z,7Z,10Z,13Z,16Z)), PA(16:0/22:5(7Z,10Z,13Z,16Z,19Z)), PA(16:1(9Z)/22:4(7Z,10Z,13Z,16Z)), PA(18:0/20:5(5Z,8Z,11Z,14Z,17Z)), PA(18:1(11Z)/20:4(5Z,8Z,11Z,14Z)), PA(18:1(11Z)/20:4(8Z,11Z,14Z,17Z)), PA(18:1(9Z)/20:4(5Z,8Z,11Z,14Z)), PA(18:1(9Z)/20:4(8Z,11Z,14Z,17Z)), PA(18:2(9Z,12Z)/20:3(5Z,8Z,11Z)), PA(18:4(6Z,9Z,12Z,15Z)/20:1(11Z)), PA(20:1(11Z)/18:4(6Z,9Z,12Z,15Z)), PA(20:3(5Z,8Z,11Z…	Glycerophospholipids					C46H78NO8P	M+H	804.554	PC(16:1(9Z)/22:6(4Z,7Z,10Z,13Z,16Z,19Z)), PC(18:2(9Z,12Z)/20:5(5Z,8Z,11Z,14Z,17Z)), PC(18:3(6Z,9Z,12Z)/20:4(5Z,8Z,11Z,14Z)), PC(18:3(6Z,9Z,12Z)/20:4(8Z,11Z,14Z,17Z)), PC(18:3(9Z,12Z,15Z)/20:4(5Z,8Z,11Z,14Z)), PC(18:3(9Z,12Z,15Z)/20:4(8Z,11Z,14Z,17Z)), PC(18:4(6Z,9Z,12Z,15Z)/20:3(5Z,8Z,11Z)), PC(18:4(6Z,9Z,12Z,15Z)/20:3(8Z,11Z,14Z)), PC(20:3(5Z,8Z,11Z)/18:4(6Z,9Z,12Z,15Z)), PC(20:3(8Z,11Z,14Z)/18:…
48	C43H74NO8P	764.524	PE(16:0/22:6(4Z,7Z,10Z,13Z,16Z,19Z)), PE(16:1(9Z)/22:5(4Z,7Z,10Z,13Z,16Z)), PE(16:1(9Z)/22:5(7Z,10Z,13Z,16Z,19Z)), PE(18:1(11Z)/20:5(5Z,8Z,11Z,14Z,17Z)), PE(18:1(9Z)/20:5(5Z,8Z,11Z,14Z,17Z)), PE(18:2(9Z,12Z)/20:4(5Z,8Z,11Z,14Z)), PE(18:2(9Z,12Z)/20:4(8Z,11Z,14Z,17Z)), PE(18:3(6Z,9Z,12Z)/20:3(5Z,8Z,11Z)), PE(18:3(6Z,9Z,12Z)/20:3(8Z,11Z,14Z)), PE(18:3(9Z,12Z,15Z)/20:3(5Z,8Z,11Z)), PE(18:3(9Z,12Z,15…	Glycerophospholipids					C44H80NO8P	M+Na	804.551	PC(14:0/22:4(7Z,10Z,13Z,16Z)), PC(16:0/20:4(5Z,8Z,11Z,14Z)), PC(16:0/20:4(8Z,11Z,14Z,17Z)), PC(16:1(9Z)/20:3(5Z,8Z,11Z)), PC(16:1(9Z)/20:3(8Z,11Z,14Z)), PC(18:0/18:4(6Z,9Z,12Z,15Z)), PC(18:1(11Z)/18:3(6Z,9Z,12Z)), PC(18:1(11Z)/18:3(9Z,12Z,15Z)), PC(18:1(9Z)/18:3(6Z,9Z,12Z)), PC(18:1(9Z)/18:3(9Z,12Z,15Z)), PC(18:2(9Z,12Z)/18:2(9Z,12Z)), PC(18:3(6Z,9Z,12Z)/18:1(11Z)), PC(18:3(6Z,9Z,12Z)/18:1(9Z)), …
49	C41H75O8P	765.484	PA(16:1(9Z)/22:2(13Z,16Z)), PA(18:0/20:3(5Z,8Z,11Z)), PA(18:2(9Z,12Z)/20:1(11Z)), PA(18:3(6Z,9Z,12Z)/20:0), PA(18:3(9Z,12Z,15Z)/20:0), PA(20:0/18:3(9Z,12Z,15Z)), PA(20:0/18:3(6Z,9Z,12Z)), PA(20:1(11Z)/18:2(9Z,12Z)), PA(20:3(5Z,8Z,11Z)/18:0), PA(22:2(13Z,16Z)/16:1(9Z)), PA(18:0/20:3(8Z,11Z,14Z)), PA(18:1(11Z)/20:2(11Z,14Z)), PA(18:1(9Z)/20:2(11Z,14Z)), PA(20:2(11Z,14Z)/18:1(11Z)), PA(20:2(11Z,14Z)…	Glycerophospholipids					C43H74NO8P	M+K	802.478	PE(16:0/22:6(4Z,7Z,10Z,13Z,16Z,19Z)), PE(16:1(9Z)/22:5(4Z,7Z,10Z,13Z,16Z)), PE(16:1(9Z)/22:5(7Z,10Z,13Z,16Z,19Z)), PE(18:1(11Z)/20:5(5Z,8Z,11Z,14Z,17Z)), PE(18:1(9Z)/20:5(5Z,8Z,11Z,14Z,17Z)), PE(18:2(9Z,12Z)/20:4(5Z,8Z,11Z,14Z)), PE(18:2(9Z,12Z)/20:4(8Z,11Z,14Z,17Z)), PE(18:3(6Z,9Z,12Z)/20:3(5Z,8Z,11Z)), PE(18:3(6Z,9Z,12Z)/20:3(8Z,11Z,14Z)), PE(18:3(9Z,12Z,15Z)/20:3(5Z,8Z,11Z)), PE(18:3(9Z,12Z,15…
50	C40H79O12P	765.527	water loss from PI(O-16:0/15:0), PI(O-18:0/13:0)	Glycerophospholipids					C45H84NO8P	M+H	798.601	PE(18:1(11Z)/22:2(13Z,16Z)), PE(18:1(9Z)/22:2(13Z,16Z)), PE(18:2(9Z,12Z)/22:1(13Z)), PE(18:3(6Z,9Z,12Z)/22:0), PE(18:3(9Z,12Z,15Z)/22:0), PE(20:0/20:3(5Z,8Z,11Z)), PE(20:0/20:3(8Z,11Z,14Z)), PE(20:1(11Z)/20:2(11Z,14Z)), PE(20:2(11Z,14Z)/20:1(11Z)), PE(20:3(5Z,8Z,11Z)/20:0), PE(20:3(8Z,11Z,14Z)/20:0), PE(22:0/18:3(6Z,9Z,12Z)), PE(22:0/18:3(9Z,12Z,15Z)), PE(22:1(13Z)/18:2(9Z,12Z)), PE(22:2(13Z,16Z)…
51	C43H76NO8P	766.54	PC(15:0/20:5(5Z,8Z,11Z,14Z,17Z)), PC(20:5(5Z,8Z,11Z,14Z,17Z)/15:0), PE(16:0/22:5(4Z,7Z,10Z,13Z,16Z)), PE(16:0/22:5(7Z,10Z,13Z,16Z,19Z)), PE(16:1(9Z)/22:4(7Z,10Z,13Z,16Z)), PE(18:0/20:5(5Z,8Z,11Z,14Z,17Z)), PE(18:1(11Z)/20:4(5Z,8Z,11Z,14Z)), PE(18:1(11Z)/20:4(8Z,11Z,14Z,17Z)), PE(18:1(9Z)/20:4(5Z,8Z,11Z,14Z)), PE(18:1(9Z)/20:4(8Z,11Z,14Z,17Z)), PE(18:2(9Z,12Z)/20:3(5Z,8Z,11Z)), PE(18:2(9Z,12Z)/20:…	Glycerophospholipids					C42H82NO8P	M+K	798.541	PC(14:0/20:1(11Z)), PC(14:1(9Z)/20:0), PC(16:0/18:1(11Z)), PC(16:0/18:1(9Z)), PC(16:1(9Z)/18:0), PC(18:0/16:1(9Z)), PC(18:1(11Z)/16:0), PC(18:1(9Z)/16:0), PC(20:0/14:1(9Z)), PC(20:1(11Z)/14:0), PE(15:0/22:1(13Z)), PE(22:1(13Z)/15:0), PE-NMe(18:0/18:1(9Z)), PE-NMe(18:0/18:1(11Z)), PE-NMe(14:1(9Z)/22:0), PE-NMe(16:0/20:1(11Z)), PE-NMe(16:1(9Z)/20:0), PE-NMe(14:0/22:1(13Z)), PE-NMe(18:1(11Z)/18:0), …
52	C43H78NO8P	768.555	PC(15:0/20:4(5Z,8Z,11Z,14Z)), PC(15:0/20:4(8Z,11Z,14Z,17Z)), PC(20:4(5Z,8Z,11Z,14Z)/15:0), PC(20:4(8Z,11Z,14Z,17Z)/15:0), PE(16:0/22:4(7Z,10Z,13Z,16Z)), PE(16:1(9Z)/20:3(8Z,11Z,14Z)), PE(18:0/20:4(5Z,8Z,11Z,14Z)), PE(18:0/20:4(8Z,11Z,14Z,17Z)), PE(18:1(11Z)/20:3(5Z,8Z,11Z)), PE(18:1(11Z)/20:3(8Z,11Z,14Z)), PE(18:1(9Z)/20:3(5Z,8Z,11Z)), PE(18:1(9Z)/20:3(8Z,11Z,14Z)), PE(18:2(9Z,12Z)/20:2(11Z,14Z))…	Glycerophospholipids					C45H75O8P	M+Na	797.509	PA(20:1(11Z)/22:6(4Z,7Z,10Z,13Z,16Z,19Z)), PA(20:3(5Z,8Z,11Z)/22:4(7Z,10Z,13Z,16Z)), PA(20:5(5Z,8Z,11Z,14Z,17Z)/22:2(13Z,16Z)), PA(22:2(13Z,16Z)/20:5(5Z,8Z,11Z,14Z,17Z)), PA(22:4(7Z,10Z,13Z,16Z)/20:3(5Z,8Z,11Z)), PA(22:6(4Z,7Z,10Z,13Z,16Z,19Z)/20:1(11Z)), PA(20:2(11Z,14Z)/22:5(4Z,7Z,10Z,13Z,16Z)), PA(20:2(11Z,14Z)/22:5(7Z,10Z,13Z,16Z,19Z)), PA(20:3(8Z,11Z,14Z)/22:4(7Z,10Z,13Z,16Z)), PA(22:4(7Z,10…
53	C43H80NO8P	770.571	PC(15:0/20:3(5Z,8Z,11Z)), PC(15:0/20:3(8Z,11Z,14Z)), PC(20:3(5Z,8Z,11Z)/15:0), PC(20:3(8Z,11Z,14Z)/15:0), PE(16:1(9Z)/22:2(13Z,16Z)), PE(18:0/20:3(5Z,8Z,11Z)), PE(18:0/20:3(8Z,11Z,14Z)), PE(18:1(11Z)/20:2(11Z,14Z)), PE(18:1(9Z)/20:2(11Z,14Z)), PE(18:2(9Z,12Z)/20:1(11Z)), PE(18:3(6Z,9Z,12Z)/20:0), PE(18:3(9Z,12Z,15Z)/20:0), PE(20:0/18:3(6Z,9Z,12Z)), PE(20:0/18:3(9Z,12Z,15Z)), PE(20:1(11Z)/18:2(9Z,…	Glycerophospholipids					C45H82NO8P	M+H	796.585	PC(15:0/22:4(7Z,10Z,13Z,16Z)), PC(22:4(7Z,10Z,13Z,16Z)/15:0), PE(18:0/22:4(7Z,10Z,13Z,16Z)), PE(18:2(9Z,12Z)/22:2(13Z,16Z)), PE(18:3(6Z,9Z,12Z)/22:1(13Z)), PE(18:3(9Z,12Z,15Z)/22:1(13Z)), PE(18:4(6Z,9Z,12Z,15Z)/22:0), PE(20:0/20:4(5Z,8Z,11Z,14Z)), PE(20:0/20:4(8Z,11Z,14Z,17Z)), PE(20:1(11Z)/20:3(5Z,8Z,11Z)), PE(20:1(11Z)/20:3(8Z,11Z,14Z)), PE(20:2(11Z,14Z)/20:2(11Z,14Z)), PE(20:3(5Z,8Z,11Z)/20:1(…
54	C43H82NO8P	772.587	PC(15:0/20:2(11Z,14Z)), PC(20:2(11Z,14Z)/15:0), PE(14:1(9Z)/24:1(15Z)), PE(16:0/22:2(13Z,16Z)), PE(16:1(9Z)/22:1(13Z)), PE(18:0/20:2(11Z,14Z)), PE(18:1(11Z)/20:1(11Z)), PE(18:1(9Z)/20:1(11Z)), PE(18:2(9Z,12Z)/20:0), PE(20:0/18:2(9Z,12Z)), PE(20:1(11Z)/18:1(11Z)), PE(20:1(11Z)/18:1(9Z)), PE(20:2(11Z,14Z)/18:0), PE(22:1(13Z)/16:1(9Z)), PE(22:2(13Z,16Z)/16:0), PE(24:1(15Z)/14:1(9Z)), PE-NMe2(18:1(9Z…	Glycerophospholipids					C42H80NO8P	M+K	796.525	PC(14:0/20:2(11Z,14Z)), PC(14:1(9Z)/20:1(11Z)), PC(16:0/18:2(9Z,12Z)), PC(16:1(9Z)/18:1(11Z)), PC(16:1(9Z)/18:1(9Z)), PC(18:1(11Z)/16:1(9Z)), PC(18:1(9Z)/16:1(9Z)), PC(18:2(9Z,12Z)/16:0), PC(20:1(11Z)/14:1(9Z)), PC(20:2(11Z,14Z)/14:0), PE(15:0/22:2(13Z,16Z)), PE(22:2(13Z,16Z)/15:0), PE-NMe(18:1(9Z)/18:1(9Z)), PE-NMe(16:1(9Z)/20:1(11Z)), PE-NMe(18:1(9Z)/18:1(11Z)), PE-NMe(18:1(11Z)/18:1(9Z)), PE-N…
55	C44H76NO8P	778.539	PC(14:0/22:6(4Z,7Z,10Z,13Z,16Z,19Z)), PC(14:1(9Z)/22:5(4Z,7Z,10Z,13Z,16Z)), PC(14:1(9Z)/22:5(7Z,10Z,13Z,16Z,19Z)), PC(16:1(9Z)/20:5(5Z,8Z,11Z,14Z,17Z)), PC(18:2(9Z,12Z)/18:4(6Z,9Z,12Z,15Z)), PC(18:3(6Z,9Z,12Z)/18:3(6Z,9Z,12Z)), PC(18:3(6Z,9Z,12Z)/18:3(9Z,12Z,15Z)), PC(18:3(9Z,12Z,15Z)/18:3(6Z,9Z,12Z)), PC(18:3(9Z,12Z,15Z)/18:3(9Z,12Z,15Z)), PC(18:4(6Z,9Z,12Z,15Z)/18:2(9Z,12Z)), PC(20:5(5Z,8Z,11Z,…	Glycerophospholipids					C45H80NO8P	M+H	794.569	PC(15:0/22:5(4Z,7Z,10Z,13Z,16Z)), PC(15:0/22:5(7Z,10Z,13Z,16Z,19Z)), PC(22:5(4Z,7Z,10Z,13Z,16Z)/15:0), PC(22:5(7Z,10Z,13Z,16Z,19Z)/15:0), PE(18:0/22:5(4Z,7Z,10Z,13Z,16Z)), PE(18:0/22:5(7Z,10Z,13Z,16Z,19Z)), PE(18:1(11Z)/22:4(7Z,10Z,13Z,16Z)), PE(18:1(9Z)/22:4(7Z,10Z,13Z,16Z)), PE(18:3(6Z,9Z,12Z)/22:2(13Z,16Z)), PE(18:3(9Z,12Z,15Z)/22:2(13Z,16Z)), PE(18:4(6Z,9Z,12Z,15Z)/22:1(13Z)), PE(20:0/20:5(5Z…
56	C44H78NO8P	780.555	PC(14:0/22:5(4Z,7Z,10Z,13Z,16Z)), PC(14:0/22:5(7Z,10Z,13Z,16Z,19Z)), PC(14:1(9Z)/22:4(7Z,10Z,13Z,16Z)), PC(16:0/20:5(5Z,8Z,11Z,14Z,17Z)), PC(16:1(9Z)/20:4(5Z,8Z,11Z,14Z)), PC(16:1(9Z)/20:4(8Z,11Z,14Z,17Z)), PC(18:1(11Z)/18:4(6Z,9Z,12Z,15Z)), PC(18:1(9Z)/18:4(6Z,9Z,12Z,15Z)), PC(18:2(9Z,12Z)/18:3(6Z,9Z,12Z)), PC(18:2(9Z,12Z)/18:3(9Z,12Z,15Z)), PC(18:3(6Z,9Z,12Z)/18:2(9Z,12Z)), PC(18:3(9Z,12Z,15Z)/…	Glycerophospholipids					C45H78NO8P	M+H	792.554	PC(15:0/22:6(4Z,7Z,10Z,13Z,16Z,19Z)), PC(22:6(4Z,7Z,10Z,13Z,16Z,19Z)/15:0), PE(18:0/22:6(4Z,7Z,10Z,13Z,16Z,19Z)), PE(18:1(11Z)/22:5(4Z,7Z,10Z,13Z,16Z)), PE(18:1(11Z)/22:5(7Z,10Z,13Z,16Z,19Z)), PE(18:1(9Z)/22:5(4Z,7Z,10Z,13Z,16Z)), PE(18:1(9Z)/22:5(7Z,10Z,13Z,16Z,19Z)), PE(18:2(9Z,12Z)/22:4(7Z,10Z,13Z,16Z)), PE(18:4(6Z,9Z,12Z,15Z)/22:2(13Z,16Z)), PE(20:1(11Z)/20:5(5Z,8Z,11Z,14Z,17Z)), PE(20:2(11Z,…
57	C44H80NO8P	782.571	PC(14:0/22:4(7Z,10Z,13Z,16Z)), PC(16:0/20:4(5Z,8Z,11Z,14Z)), PC(16:0/20:4(8Z,11Z,14Z,17Z)), PC(16:1(9Z)/20:3(5Z,8Z,11Z)), PC(16:1(9Z)/20:3(8Z,11Z,14Z)), PC(18:0/18:4(6Z,9Z,12Z,15Z)), PC(18:1(11Z)/18:3(6Z,9Z,12Z)), PC(18:1(11Z)/18:3(9Z,12Z,15Z)), PC(18:1(9Z)/18:3(6Z,9Z,12Z)), PC(18:1(9Z)/18:3(9Z,12Z,15Z)), PC(18:2(9Z,12Z)/18:2(9Z,12Z)), PC(18:3(6Z,9Z,12Z)/18:1(11Z)), PC(18:3(6Z,9Z,12Z)/18:1(9Z)), …	Glycerophospholipids					C43H80NO8P	M+Na	792.551	PC(15:0/20:3(5Z,8Z,11Z)), PC(15:0/20:3(8Z,11Z,14Z)), PC(20:3(5Z,8Z,11Z)/15:0), PC(20:3(8Z,11Z,14Z)/15:0), PE(16:1(9Z)/22:2(13Z,16Z)), PE(18:0/20:3(5Z,8Z,11Z)), PE(18:0/20:3(8Z,11Z,14Z)), PE(18:1(11Z)/20:2(11Z,14Z)), PE(18:1(9Z)/20:2(11Z,14Z)), PE(18:2(9Z,12Z)/20:1(11Z)), PE(18:3(6Z,9Z,12Z)/20:0), PE(18:3(9Z,12Z,15Z)/20:0), PE(20:0/18:3(6Z,9Z,12Z)), PE(20:0/18:3(9Z,12Z,15Z)), PE(20:1(11Z)/18:2(9Z,…
58	C43H71O8P	785.453	PA(18:1(11Z)/22:6(4Z,7Z,10Z,13Z,16Z,19Z)), PA(18:1(9Z)/22:6(4Z,7Z,10Z,13Z,16Z,19Z)), PA(18:2(9Z,12Z)/22:5(4Z,7Z,10Z,13Z,16Z)), PA(18:2(9Z,12Z)/22:5(7Z,10Z,13Z,16Z,19Z)), PA(18:3(6Z,9Z,12Z)/22:4(7Z,10Z,13Z,16Z)), PA(18:3(9Z,12Z,15Z)/22:4(7Z,10Z,13Z,16Z)), PA(20:3(5Z,8Z,11Z)/20:4(5Z,8Z,11Z,14Z)), PA(20:3(5Z,8Z,11Z)/20:4(8Z,11Z,14Z,17Z)), PA(20:4(5Z,8Z,11Z,14Z)/20:3(5Z,8Z,11Z)), PA(20:4(8Z,11Z,14Z,1…	Glycerophospholipids					C45H76NO8P	M+H	790.538	PE(18:1(11Z)/22:6(4Z,7Z,10Z,13Z,16Z,19Z)), PE(18:1(9Z)/22:6(4Z,7Z,10Z,13Z,16Z,19Z)), PE(18:2(9Z,12Z)/22:5(4Z,7Z,10Z,13Z,16Z)), PE(18:2(9Z,12Z)/22:5(7Z,10Z,13Z,16Z,19Z)), PE(18:3(6Z,9Z,12Z)/22:4(7Z,10Z,13Z,16Z)), PE(18:3(9Z,12Z,15Z)/22:4(7Z,10Z,13Z,16Z)), PE(20:2(11Z,14Z)/20:5(5Z,8Z,11Z,14Z,17Z)), PE(20:3(5Z,8Z,11Z)/20:4(5Z,8Z,11Z,14Z)), PE(20:3(5Z,8Z,11Z)/20:4(8Z,11Z,14Z,17Z)), PE(20:3(8Z,11Z,14Z…
59	C44H84NO8P	786.602	PC(18:1(9Z)/18:1(9Z)), PC(14:0/22:2(13Z,16Z)), PC(14:1(9Z)/22:1(13Z)), PC(16:0/20:2(11Z,14Z)), PC(16:1(9Z)/20:1(11Z)), PC(18:0/18:2(9Z,12Z)), PC(18:1(11Z)/18:1(11Z)), PC(18:1(11Z)/18:1(9Z)), PC(18:1(9Z)/18:1(11Z)), PC(18:2(9Z,12Z)/18:0), PC(20:1(11Z)/16:1(9Z)), PC(20:2(11Z,14Z)/16:0), PC(22:1(13Z)/14:1(9Z)), PC(22:2(13Z,16Z)/14:0), 1,2-dioleoyl-sn-glycero-3-phosphocholine, PE-NMe(14:1(9Z)/24:1(15…	Glycerophospholipids					C43H75O8P	M+K	789.483	PA(18:0/22:5(4Z,7Z,10Z,13Z,16Z)), PA(18:0/22:5(7Z,10Z,13Z,16Z,19Z)), PA(18:1(11Z)/22:4(7Z,10Z,13Z,16Z)), PA(18:1(9Z)/22:4(7Z,10Z,13Z,16Z)), PA(18:3(6Z,9Z,12Z)/22:2(13Z,16Z)), PA(18:3(9Z,12Z,15Z)/22:2(13Z,16Z)), PA(18:4(6Z,9Z,12Z,15Z)/22:1(13Z)), PA(20:0/20:5(5Z,8Z,11Z,14Z,17Z)), PA(20:1(11Z)/20:4(5Z,8Z,11Z,14Z)), PA(20:1(11Z)/20:4(8Z,11Z,14Z,17Z)), PA(20:4(5Z,8Z,11Z,14Z)/20:1(11Z)), PA(20:4(8Z,11…
60	C43H75O8P	789.484	PA(18:0/22:5(4Z,7Z,10Z,13Z,16Z)), PA(18:0/22:5(7Z,10Z,13Z,16Z,19Z)), PA(18:1(11Z)/22:4(7Z,10Z,13Z,16Z)), PA(18:1(9Z)/22:4(7Z,10Z,13Z,16Z)), PA(18:3(6Z,9Z,12Z)/22:2(13Z,16Z)), PA(18:3(9Z,12Z,15Z)/22:2(13Z,16Z)), PA(18:4(6Z,9Z,12Z,15Z)/22:1(13Z)), PA(20:0/20:5(5Z,8Z,11Z,14Z,17Z)), PA(20:1(11Z)/20:4(5Z,8Z,11Z,14Z)), PA(20:1(11Z)/20:4(8Z,11Z,14Z,17Z)), PA(20:4(5Z,8Z,11Z,14Z)/20:1(11Z)), PA(20:4(8Z,11…	Glycerophospholipids					C44H84NO8P	M+H	786.601	PC(18:1(9Z)/18:1(9Z)), PC(14:0/22:2(13Z,16Z)), PC(14:1(9Z)/22:1(13Z)), PC(16:0/20:2(11Z,14Z)), PC(16:1(9Z)/20:1(11Z)), PC(18:0/18:2(9Z,12Z)), PC(18:1(11Z)/18:1(11Z)), PC(18:1(11Z)/18:1(9Z)), PC(18:1(9Z)/18:1(11Z)), PC(18:2(9Z,12Z)/18:0), PC(20:1(11Z)/16:1(9Z)), PC(20:2(11Z,14Z)/16:0), PC(22:1(13Z)/14:1(9Z)), PC(22:2(13Z,16Z)/14:0), 1,2-dioleoyl-sn-glycero-3-phosphocholine, PE-NMe(14:1(9Z)/24:1(15…
61	C45H76NO8P	790.539	PE(18:1(11Z)/22:6(4Z,7Z,10Z,13Z,16Z,19Z)), PE(18:1(9Z)/22:6(4Z,7Z,10Z,13Z,16Z,19Z)), PE(18:2(9Z,12Z)/22:5(4Z,7Z,10Z,13Z,16Z)), PE(18:2(9Z,12Z)/22:5(7Z,10Z,13Z,16Z,19Z)), PE(18:3(6Z,9Z,12Z)/22:4(7Z,10Z,13Z,16Z)), PE(18:3(9Z,12Z,15Z)/22:4(7Z,10Z,13Z,16Z)), PE(20:2(11Z,14Z)/20:5(5Z,8Z,11Z,14Z,17Z)), PE(20:3(5Z,8Z,11Z)/20:4(5Z,8Z,11Z,14Z)), PE(20:3(5Z,8Z,11Z)/20:4(8Z,11Z,14Z,17Z)), PE(20:3(8Z,11Z,14Z…	Glycerophospholipids					C43H74NO8P	M+Na	786.504	PE(16:0/22:6(4Z,7Z,10Z,13Z,16Z,19Z)), PE(16:1(9Z)/22:5(4Z,7Z,10Z,13Z,16Z)), PE(16:1(9Z)/22:5(7Z,10Z,13Z,16Z,19Z)), PE(18:1(11Z)/20:5(5Z,8Z,11Z,14Z,17Z)), PE(18:1(9Z)/20:5(5Z,8Z,11Z,14Z,17Z)), PE(18:2(9Z,12Z)/20:4(5Z,8Z,11Z,14Z)), PE(18:2(9Z,12Z)/20:4(8Z,11Z,14Z,17Z)), PE(18:3(6Z,9Z,12Z)/20:3(5Z,8Z,11Z)), PE(18:3(6Z,9Z,12Z)/20:3(8Z,11Z,14Z)), PE(18:3(9Z,12Z,15Z)/20:3(5Z,8Z,11Z)), PE(18:3(9Z,12Z,15…
62	C45H78NO8P	792.555	PC(15:0/22:6(4Z,7Z,10Z,13Z,16Z,19Z)), PC(22:6(4Z,7Z,10Z,13Z,16Z,19Z)/15:0), PE(18:0/22:6(4Z,7Z,10Z,13Z,16Z,19Z)), PE(18:1(11Z)/22:5(4Z,7Z,10Z,13Z,16Z)), PE(18:1(11Z)/22:5(7Z,10Z,13Z,16Z,19Z)), PE(18:1(9Z)/22:5(4Z,7Z,10Z,13Z,16Z)), PE(18:1(9Z)/22:5(7Z,10Z,13Z,16Z,19Z)), PE(18:2(9Z,12Z)/22:4(7Z,10Z,13Z,16Z)), PE(18:4(6Z,9Z,12Z,15Z)/22:2(13Z,16Z)), PE(20:1(11Z)/20:5(5Z,8Z,11Z,14Z,17Z)), PE(20:2(11Z,…	Glycerophospholipids					C43H71O8P	M+K	785.452	PA(18:1(11Z)/22:6(4Z,7Z,10Z,13Z,16Z,19Z)), PA(18:1(9Z)/22:6(4Z,7Z,10Z,13Z,16Z,19Z)), PA(18:2(9Z,12Z)/22:5(4Z,7Z,10Z,13Z,16Z)), PA(18:2(9Z,12Z)/22:5(7Z,10Z,13Z,16Z,19Z)), PA(18:3(6Z,9Z,12Z)/22:4(7Z,10Z,13Z,16Z)), PA(18:3(9Z,12Z,15Z)/22:4(7Z,10Z,13Z,16Z)), PA(20:3(5Z,8Z,11Z)/20:4(5Z,8Z,11Z,14Z)), PA(20:3(5Z,8Z,11Z)/20:4(8Z,11Z,14Z,17Z)), PA(20:4(5Z,8Z,11Z,14Z)/20:3(5Z,8Z,11Z)), PA(20:4(8Z,11Z,14Z,1…
63	C45H80NO8P	794.571	PC(15:0/22:5(4Z,7Z,10Z,13Z,16Z)), PC(15:0/22:5(7Z,10Z,13Z,16Z,19Z)), PC(22:5(4Z,7Z,10Z,13Z,16Z)/15:0), PC(22:5(7Z,10Z,13Z,16Z,19Z)/15:0), PE(18:0/22:5(4Z,7Z,10Z,13Z,16Z)), PE(18:0/22:5(7Z,10Z,13Z,16Z,19Z)), PE(18:1(11Z)/22:4(7Z,10Z,13Z,16Z)), PE(18:1(9Z)/22:4(7Z,10Z,13Z,16Z)), PE(18:3(6Z,9Z,12Z)/22:2(13Z,16Z)), PE(18:3(9Z,12Z,15Z)/22:2(13Z,16Z)), PE(18:4(6Z,9Z,12Z,15Z)/22:1(13Z)), PE(20:0/20:5(5Z…	Glycerophospholipids					C44H82NO8P	M+H	784.585	PC(14:1(9Z)/22:2(13Z,16Z)), PC(16:0/20:3(5Z,8Z,11Z)), PC(16:0/20:3(8Z,11Z,14Z)), PC(16:1(9Z)/20:2(11Z,14Z)), PC(18:0/18:3(6Z,9Z,12Z)), PC(18:0/18:3(9Z,12Z,15Z)), PC(18:1(11Z)/18:2(9Z,12Z)), PC(18:1(9Z)/18:2(9Z,12Z)), PC(18:2(9Z,12Z)/18:1(11Z)), PC(18:2(9Z,12Z)/18:1(9Z)), PC(18:3(6Z,9Z,12Z)/18:0), PC(18:3(9Z,12Z,15Z)/18:0), PC(20:2(11Z,14Z)/16:1(9Z)), PC(20:3(5Z,8Z,11Z)/16:0), PC(20:3(8Z,11Z,14Z)/…
64	C45H82NO8P	796.587	PC(15:0/22:4(7Z,10Z,13Z,16Z)), PC(22:4(7Z,10Z,13Z,16Z)/15:0), PE(18:0/22:4(7Z,10Z,13Z,16Z)), PE(18:2(9Z,12Z)/22:2(13Z,16Z)), PE(18:3(6Z,9Z,12Z)/22:1(13Z)), PE(18:3(9Z,12Z,15Z)/22:1(13Z)), PE(18:4(6Z,9Z,12Z,15Z)/22:0), PE(20:0/20:4(5Z,8Z,11Z,14Z)), PE(20:0/20:4(8Z,11Z,14Z,17Z)), PE(20:1(11Z)/20:3(5Z,8Z,11Z)), PE(20:1(11Z)/20:3(8Z,11Z,14Z)), PE(20:2(11Z,14Z)/20:2(11Z,14Z)), PE(20:3(5Z,8Z,11Z)/20:1(…	Glycerophospholipids					C44H80NO8P	M+H	782.569	PC(14:0/22:4(7Z,10Z,13Z,16Z)), PC(16:0/20:4(5Z,8Z,11Z,14Z)), PC(16:0/20:4(8Z,11Z,14Z,17Z)), PC(16:1(9Z)/20:3(5Z,8Z,11Z)), PC(16:1(9Z)/20:3(8Z,11Z,14Z)), PC(18:0/18:4(6Z,9Z,12Z,15Z)), PC(18:1(11Z)/18:3(6Z,9Z,12Z)), PC(18:1(11Z)/18:3(9Z,12Z,15Z)), PC(18:1(9Z)/18:3(6Z,9Z,12Z)), PC(18:1(9Z)/18:3(9Z,12Z,15Z)), PC(18:2(9Z,12Z)/18:2(9Z,12Z)), PC(18:3(6Z,9Z,12Z)/18:1(11Z)), PC(18:3(6Z,9Z,12Z)/18:1(9Z)), …
65	C44H82NO10P	798.566	water loss is @ 780.5554, could be water loss from 812.5808 - a PS PS(18:0/20:4(8Z,11Z,14Z,17Z)), PS(18:0/20:4(5Z,8Z,11Z,14Z)), PS(18:1(9Z)/20:3(8Z,11Z,14Z)), PS(20:3(8Z,11Z,14Z)/18:1(9Z)), PS(20:4(5Z,8Z,11Z,14Z)/18:0), PS(16:0/22:4(7Z,10Z,13Z,16Z)), PS(18:1(11Z)/20:3(5Z,8Z,11Z)), PS(18:1(11Z)/20:3(8Z,11Z,14Z)), PS(18:1(9Z)/20:3(5Z,8Z,11Z)), PS(18:2(9Z,12Z)/20:2(11Z,14Z)), PS(18:3(6Z,9Z,12Z)/20:1…	Glycerophospholipids					C44H78NO8P	M+H	780.554	PC(14:0/22:5(4Z,7Z,10Z,13Z,16Z)), PC(14:0/22:5(7Z,10Z,13Z,16Z,19Z)), PC(14:1(9Z)/22:4(7Z,10Z,13Z,16Z)), PC(16:0/20:5(5Z,8Z,11Z,14Z,17Z)), PC(16:1(9Z)/20:4(5Z,8Z,11Z,14Z)), PC(16:1(9Z)/20:4(8Z,11Z,14Z,17Z)), PC(18:1(11Z)/18:4(6Z,9Z,12Z,15Z)), PC(18:1(9Z)/18:4(6Z,9Z,12Z,15Z)), PC(18:2(9Z,12Z)/18:3(6Z,9Z,12Z)), PC(18:2(9Z,12Z)/18:3(9Z,12Z,15Z)), PC(18:3(6Z,9Z,12Z)/18:2(9Z,12Z)), PC(18:3(9Z,12Z,15Z)/…
66	C45H84NO8P	798.603	PE(18:1(11Z)/22:2(13Z,16Z)), PE(18:1(9Z)/22:2(13Z,16Z)), PE(18:2(9Z,12Z)/22:1(13Z)), PE(18:3(6Z,9Z,12Z)/22:0), PE(18:3(9Z,12Z,15Z)/22:0), PE(20:0/20:3(5Z,8Z,11Z)), PE(20:0/20:3(8Z,11Z,14Z)), PE(20:1(11Z)/20:2(11Z,14Z)), PE(20:2(11Z,14Z)/20:1(11Z)), PE(20:3(5Z,8Z,11Z)/20:0), PE(20:3(8Z,11Z,14Z)/20:0), PE(22:0/18:3(6Z,9Z,12Z)), PE(22:0/18:3(9Z,12Z,15Z)), PE(22:1(13Z)/18:2(9Z,12Z)), PE(22:2(13Z,16Z)…	Glycerophospholipids					C44H76NO8P	M+H	778.538	PC(14:0/22:6(4Z,7Z,10Z,13Z,16Z,19Z)), PC(14:1(9Z)/22:5(4Z,7Z,10Z,13Z,16Z)), PC(14:1(9Z)/22:5(7Z,10Z,13Z,16Z,19Z)), PC(16:1(9Z)/20:5(5Z,8Z,11Z,14Z,17Z)), PC(18:2(9Z,12Z)/18:4(6Z,9Z,12Z,15Z)), PC(18:3(6Z,9Z,12Z)/18:3(6Z,9Z,12Z)), PC(18:3(6Z,9Z,12Z)/18:3(9Z,12Z,15Z)), PC(18:3(9Z,12Z,15Z)/18:3(6Z,9Z,12Z)), PC(18:3(9Z,12Z,15Z)/18:3(9Z,12Z,15Z)), PC(18:4(6Z,9Z,12Z,15Z)/18:2(9Z,12Z)), PC(20:5(5Z,8Z,11Z,…
67	C46H78NO8P	804.555	PC(16:1(9Z)/22:6(4Z,7Z,10Z,13Z,16Z,19Z)), PC(18:2(9Z,12Z)/20:5(5Z,8Z,11Z,14Z,17Z)), PC(18:3(6Z,9Z,12Z)/20:4(5Z,8Z,11Z,14Z)), PC(18:3(6Z,9Z,12Z)/20:4(8Z,11Z,14Z,17Z)), PC(18:3(9Z,12Z,15Z)/20:4(5Z,8Z,11Z,14Z)), PC(18:3(9Z,12Z,15Z)/20:4(8Z,11Z,14Z,17Z)), PC(18:4(6Z,9Z,12Z,15Z)/20:3(5Z,8Z,11Z)), PC(18:4(6Z,9Z,12Z,15Z)/20:3(8Z,11Z,14Z)), PC(20:3(5Z,8Z,11Z)/18:4(6Z,9Z,12Z,15Z)), PC(20:3(8Z,11Z,14Z)/18:…	Glycerophospholipids					C41H74NO8P	M+K	778.478	PC(15:0/18:4(6Z,9Z,12Z,15Z)), PC(18:4(6Z,9Z,12Z,15Z)/15:0), PE(14:0/22:4(7Z,10Z,13Z,16Z)), PE(16:0/20:4(5Z,8Z,11Z,14Z)), PE(16:0/20:4(8Z,11Z,14Z,17Z)), PE(16:1(9Z)/20:3(5Z,8Z,11Z)), PE(18:0/18:4(6Z,9Z,12Z,15Z)), PE(18:1(11Z)/18:3(6Z,9Z,12Z)), PE(18:1(11Z)/18:3(9Z,12Z,15Z)), PE(18:1(9Z)/18:3(6Z,9Z,12Z)), PE(18:1(9Z)/18:3(9Z,12Z,15Z)), PE(18:2(9Z,12Z)/18:2(9Z,12Z)), PE(18:3(6Z,9Z,12Z)/18:1(11Z)), P…
68	C46H80NO8P	806.57	PC(16:0/22:6(4Z,7Z,10Z,13Z,16Z,19Z)), PC(16:1(9Z)/22:5(4Z,7Z,10Z,13Z,16Z)), PC(16:1(9Z)/22:5(7Z,10Z,13Z,16Z,19Z)), PC(18:1(11Z)/20:5(5Z,8Z,11Z,14Z,17Z)), PC(18:1(9Z)/20:5(5Z,8Z,11Z,14Z,17Z)), PC(18:2(9Z,12Z)/20:4(5Z,8Z,11Z,14Z)), PC(18:2(9Z,12Z)/20:4(8Z,11Z,14Z,17Z)), PC(18:3(6Z,9Z,12Z)/20:3(5Z,8Z,11Z)), PC(18:3(6Z,9Z,12Z)/20:3(8Z,11Z,14Z)), PC(18:3(9Z,12Z,15Z)/20:3(5Z,8Z,11Z)), PC(18:3(9Z,12Z,15…	Glycerophospholipids					C45H75O8P	M+H	775.527	PA(20:1(11Z)/22:6(4Z,7Z,10Z,13Z,16Z,19Z)), PA(20:3(5Z,8Z,11Z)/22:4(7Z,10Z,13Z,16Z)), PA(20:5(5Z,8Z,11Z,14Z,17Z)/22:2(13Z,16Z)), PA(22:2(13Z,16Z)/20:5(5Z,8Z,11Z,14Z,17Z)), PA(22:4(7Z,10Z,13Z,16Z)/20:3(5Z,8Z,11Z)), PA(22:6(4Z,7Z,10Z,13Z,16Z,19Z)/20:1(11Z)), PA(20:2(11Z,14Z)/22:5(4Z,7Z,10Z,13Z,16Z)), PA(20:2(11Z,14Z)/22:5(7Z,10Z,13Z,16Z,19Z)), PA(20:3(8Z,11Z,14Z)/22:4(7Z,10Z,13Z,16Z)), PA(22:4(7Z,10…
69	C46H82NO8P	808.587	PC(16:0/22:5(4Z,7Z,10Z,13Z,16Z)), PC(16:0/22:5(7Z,10Z,13Z,16Z,19Z)), PC(16:1(9Z)/22:4(7Z,10Z,13Z,16Z)), PC(18:0/20:5(5Z,8Z,11Z,14Z,17Z)), PC(18:1(11Z)/20:4(5Z,8Z,11Z,14Z)), PC(18:1(11Z)/20:4(8Z,11Z,14Z,17Z)), PC(18:1(9Z)/20:4(5Z,8Z,11Z,14Z)), PC(18:1(9Z)/20:4(8Z,11Z,14Z,17Z)), PC(18:2(9Z,12Z)/20:3(5Z,8Z,11Z)), PC(18:2(9Z,12Z)/20:3(8Z,11Z,14Z)), PC(18:3(6Z,9Z,12Z)/20:2(11Z,14Z)), PC(18:3(9Z,12Z,15…	Glycerophospholipids					C43H75O8P	M+Na	773.509	PA(18:0/22:5(4Z,7Z,10Z,13Z,16Z)), PA(18:0/22:5(7Z,10Z,13Z,16Z,19Z)), PA(18:1(11Z)/22:4(7Z,10Z,13Z,16Z)), PA(18:1(9Z)/22:4(7Z,10Z,13Z,16Z)), PA(18:3(6Z,9Z,12Z)/22:2(13Z,16Z)), PA(18:3(9Z,12Z,15Z)/22:2(13Z,16Z)), PA(18:4(6Z,9Z,12Z,15Z)/22:1(13Z)), PA(20:0/20:5(5Z,8Z,11Z,14Z,17Z)), PA(20:1(11Z)/20:4(5Z,8Z,11Z,14Z)), PA(20:1(11Z)/20:4(8Z,11Z,14Z,17Z)), PA(20:4(5Z,8Z,11Z,14Z)/20:1(11Z)), PA(20:4(8Z,11…
70	C46H84NO8P	810.602	PC(16:0/22:4(7Z,10Z,13Z,16Z)), PC(18:0/20:4(5Z,8Z,11Z,14Z)), PC(18:0/20:4(8Z,11Z,14Z,17Z)), PC(18:1(11Z)/20:3(5Z,8Z,11Z)), PC(18:1(11Z)/20:3(8Z,11Z,14Z)), PC(18:1(9Z)/20:3(5Z,8Z,11Z)), PC(18:1(9Z)/20:3(8Z,11Z,14Z)), PC(18:2(9Z,12Z)/20:2(11Z,14Z)), PC(18:3(6Z,9Z,12Z)/20:1(11Z)), PC(18:3(9Z,12Z,15Z)/20:1(11Z)), PC(18:4(6Z,9Z,12Z,15Z)/20:0), PC(20:0/18:4(6Z,9Z,12Z,15Z)), PC(20:1(11Z)/18:3(6Z,9Z,12Z)…	Glycerophospholipids					C43H82NO8P	M+H	772.585	PC(15:0/20:2(11Z,14Z)), PC(20:2(11Z,14Z)/15:0), PE(14:1(9Z)/24:1(15Z)), PE(16:0/22:2(13Z,16Z)), PE(16:1(9Z)/22:1(13Z)), PE(18:0/20:2(11Z,14Z)), PE(18:1(11Z)/20:1(11Z)), PE(18:1(9Z)/20:1(11Z)), PE(18:2(9Z,12Z)/20:0), PE(20:0/18:2(9Z,12Z)), PE(20:1(11Z)/18:1(11Z)), PE(20:1(11Z)/18:1(9Z)), PE(20:2(11Z,14Z)/18:0), PE(22:1(13Z)/16:1(9Z)), PE(22:2(13Z,16Z)/16:0), PE(24:1(15Z)/14:1(9Z)), PE-NMe2(18:1(9Z…
71	C45H84NO10P	812.581	water loss from PS(18:0/20:4(8Z,11Z,14Z,17Z)), PS(18:0/20:4(5Z,8Z,11Z,14Z)), PS(18:1(9Z)/20:3(8Z,11Z,14Z)), PS(20:3(8Z,11Z,14Z)/18:1(9Z)), PS(20:4(5Z,8Z,11Z,14Z)/18:0), PS(16:0/22:4(7Z,10Z,13Z,16Z)), PS(18:1(11Z)/20:3(5Z,8Z,11Z)), PS(18:1(11Z)/20:3(8Z,11Z,14Z)), PS(18:1(9Z)/20:3(5Z,8Z,11Z)), PS(18:2(9Z,12Z)/20:2(11Z,14Z)), PS(18:3(6Z,9Z,12Z)/20:1(11Z)), PS(18:3(9Z,12Z,15Z)/20:1(11Z)), PS(18:4(6Z,…	Glycerophospholipids					C43H80NO8P	M+H	770.569	PC(15:0/20:3(5Z,8Z,11Z)), PC(15:0/20:3(8Z,11Z,14Z)), PC(20:3(5Z,8Z,11Z)/15:0), PC(20:3(8Z,11Z,14Z)/15:0), PE(16:1(9Z)/22:2(13Z,16Z)), PE(18:0/20:3(5Z,8Z,11Z)), PE(18:0/20:3(8Z,11Z,14Z)), PE(18:1(11Z)/20:2(11Z,14Z)), PE(18:1(9Z)/20:2(11Z,14Z)), PE(18:2(9Z,12Z)/20:1(11Z)), PE(18:3(6Z,9Z,12Z)/20:0), PE(18:3(9Z,12Z,15Z)/20:0), PE(20:0/18:3(6Z,9Z,12Z)), PE(20:0/18:3(9Z,12Z,15Z)), PE(20:1(11Z)/18:2(9Z,…
72	C45H75O8P	813.484	PA(20:1(11Z)/22:6(4Z,7Z,10Z,13Z,16Z,19Z)), PA(20:3(5Z,8Z,11Z)/22:4(7Z,10Z,13Z,16Z)), PA(20:5(5Z,8Z,11Z,14Z,17Z)/22:2(13Z,16Z)), PA(22:2(13Z,16Z)/20:5(5Z,8Z,11Z,14Z,17Z)), PA(22:4(7Z,10Z,13Z,16Z)/20:3(5Z,8Z,11Z)), PA(22:6(4Z,7Z,10Z,13Z,16Z,19Z)/20:1(11Z)), PA(20:2(11Z,14Z)/22:5(4Z,7Z,10Z,13Z,16Z)), PA(20:2(11Z,14Z)/22:5(7Z,10Z,13Z,16Z,19Z)), PA(20:3(8Z,11Z,14Z)/22:4(7Z,10Z,13Z,16Z)), PA(22:4(7Z,10…	Glycerophospholipids					C43H71O8P	M+Na	769.478	PA(18:1(11Z)/22:6(4Z,7Z,10Z,13Z,16Z,19Z)), PA(18:1(9Z)/22:6(4Z,7Z,10Z,13Z,16Z,19Z)), PA(18:2(9Z,12Z)/22:5(4Z,7Z,10Z,13Z,16Z)), PA(18:2(9Z,12Z)/22:5(7Z,10Z,13Z,16Z,19Z)), PA(18:3(6Z,9Z,12Z)/22:4(7Z,10Z,13Z,16Z)), PA(18:3(9Z,12Z,15Z)/22:4(7Z,10Z,13Z,16Z)), PA(20:3(5Z,8Z,11Z)/20:4(5Z,8Z,11Z,14Z)), PA(20:3(5Z,8Z,11Z)/20:4(8Z,11Z,14Z,17Z)), PA(20:4(5Z,8Z,11Z,14Z)/20:3(5Z,8Z,11Z)), PA(20:4(8Z,11Z,14Z,1…
73	C47H80NO8P	818.571	PE(20:1(11Z)/22:6(4Z,7Z,10Z,13Z,16Z,19Z)), PE(20:2(11Z,14Z)/22:5(4Z,7Z,10Z,13Z,16Z)), PE(20:2(11Z,14Z)/22:5(7Z,10Z,13Z,16Z,19Z)), PE(20:3(5Z,8Z,11Z)/22:4(7Z,10Z,13Z,16Z)), PE(20:3(8Z,11Z,14Z)/22:4(7Z,10Z,13Z,16Z)), PE(20:5(5Z,8Z,11Z,14Z,17Z)/22:2(13Z,16Z)), PE(22:2(13Z,16Z)/20:5(5Z,8Z,11Z,14Z,17Z)), PE(22:4(7Z,10Z,13Z,16Z)/20:3(5Z,8Z,11Z)), PE(22:4(7Z,10Z,13Z,16Z)/20:3(8Z,11Z,14Z)), PE(22:5(4Z,7Z…	Glycerophospholipids					C43H78NO8P	M+H	768.554	PC(15:0/20:4(5Z,8Z,11Z,14Z)), PC(15:0/20:4(8Z,11Z,14Z,17Z)), PC(20:4(5Z,8Z,11Z,14Z)/15:0), PC(20:4(8Z,11Z,14Z,17Z)/15:0), PE(16:0/22:4(7Z,10Z,13Z,16Z)), PE(16:1(9Z)/20:3(8Z,11Z,14Z)), PE(18:0/20:4(5Z,8Z,11Z,14Z)), PE(18:0/20:4(8Z,11Z,14Z,17Z)), PE(18:1(11Z)/20:3(5Z,8Z,11Z)), PE(18:1(11Z)/20:3(8Z,11Z,14Z)), PE(18:1(9Z)/20:3(5Z,8Z,11Z)), PE(18:1(9Z)/20:3(8Z,11Z,14Z)), PE(18:2(9Z,12Z)/20:2(11Z,14Z))…
74	C47H82NO8P	820.586	PE(20:0/22:6(4Z,7Z,10Z,13Z,16Z,19Z)), PE(20:1(11Z)/22:5(4Z,7Z,10Z,13Z,16Z)), PE(20:1(11Z)/22:5(7Z,10Z,13Z,16Z,19Z)), PE(20:2(11Z,14Z)/22:4(7Z,10Z,13Z,16Z)), PE(20:4(5Z,8Z,11Z,14Z)/22:2(13Z,16Z)), PE(20:4(8Z,11Z,14Z,17Z)/22:2(13Z,16Z)), PE(20:5(5Z,8Z,11Z,14Z,17Z)/22:1(13Z)), PE(22:1(13Z)/20:5(5Z,8Z,11Z,14Z,17Z)), PE(22:2(13Z,16Z)/20:4(5Z,8Z,11Z,14Z)), PE(22:2(13Z,16Z)/20:4(8Z,11Z,14Z,17Z)), PE(22:…	Glycerophospholipids					C43H76NO8P	M+H	766.538	PC(15:0/20:5(5Z,8Z,11Z,14Z,17Z)), PC(20:5(5Z,8Z,11Z,14Z,17Z)/15:0), PE(16:0/22:5(4Z,7Z,10Z,13Z,16Z)), PE(16:0/22:5(7Z,10Z,13Z,16Z,19Z)), PE(16:1(9Z)/22:4(7Z,10Z,13Z,16Z)), PE(18:0/20:5(5Z,8Z,11Z,14Z,17Z)), PE(18:1(11Z)/20:4(5Z,8Z,11Z,14Z)), PE(18:1(11Z)/20:4(8Z,11Z,14Z,17Z)), PE(18:1(9Z)/20:4(5Z,8Z,11Z,14Z)), PE(18:1(9Z)/20:4(8Z,11Z,14Z,17Z)), PE(18:2(9Z,12Z)/20:3(5Z,8Z,11Z)), PE(18:2(9Z,12Z)/20:…
75	C47H84NO8P	822.603	PE(18:4(6Z,9Z,12Z,15Z)/24:1(15Z)), PE(20:0/22:5(4Z,7Z,10Z,13Z,16Z)), PE(20:0/22:5(7Z,10Z,13Z,16Z,19Z)), PE(20:1(11Z)/22:4(7Z,10Z,13Z,16Z)), PE(20:3(5Z,8Z,11Z)/22:2(13Z,16Z)), PE(20:3(8Z,11Z,14Z)/22:2(13Z,16Z)), PE(20:4(5Z,8Z,11Z,14Z)/22:1(13Z)), PE(20:4(8Z,11Z,14Z,17Z)/22:1(13Z)), PE(20:5(5Z,8Z,11Z,14Z,17Z)/22:0), PE(22:0/20:5(5Z,8Z,11Z,14Z,17Z)), PE(22:1(13Z)/20:4(5Z,8Z,11Z,14Z)), PE(22:1(13Z)/2…	Glycerophospholipids					C41H75O8P	M+K	765.483	PA(16:1(9Z)/22:2(13Z,16Z)), PA(18:0/20:3(5Z,8Z,11Z)), PA(18:2(9Z,12Z)/20:1(11Z)), PA(18:3(6Z,9Z,12Z)/20:0), PA(18:3(9Z,12Z,15Z)/20:0), PA(20:0/18:3(9Z,12Z,15Z)), PA(20:0/18:3(6Z,9Z,12Z)), PA(20:1(11Z)/18:2(9Z,12Z)), PA(20:3(5Z,8Z,11Z)/18:0), PA(22:2(13Z,16Z)/16:1(9Z)), PA(18:0/20:3(8Z,11Z,14Z)), PA(18:1(11Z)/20:2(11Z,14Z)), PA(18:1(9Z)/20:2(11Z,14Z)), PA(20:2(11Z,14Z)/18:1(11Z)), PA(20:2(11Z,14Z)…
76	C45H90N2O6P or C47H86NO8P	824.618	SM(d16:1/24:1(15Z)) (PE VERY CLOSE BY) PE(18:3(6Z,9Z,12Z)/24:1(15Z)), PE(18:3(9Z,12Z,15Z)/24:1(15Z)), PE(18:4(6Z,9Z,12Z,15Z)/24:0), PE(20:0/22:4(7Z,10Z,13Z,16Z)), PE(20:2(11Z,14Z)/22:2(13Z,16Z)), PE(20:3(5Z,8Z,11Z)/22:1(13Z)), PE(20:3(8Z,11Z,14Z)/22:1(13Z)), PE(20:4(5Z,8Z,11Z,14Z)/22:0), PE(20:4(8Z,11Z,14Z,17Z)/22:0), PE(22:0/20:4(5Z,8Z,11Z,14Z)), PE(22:0/20:4(8Z,11Z,14Z,17Z)), PE(22:1(13Z)/20:3(…	Sphingolipids/Glycerophospholipids					C43H74NO8P	M+H	764.522	PE(16:0/22:6(4Z,7Z,10Z,13Z,16Z,19Z)), PE(16:1(9Z)/22:5(4Z,7Z,10Z,13Z,16Z)), PE(16:1(9Z)/22:5(7Z,10Z,13Z,16Z,19Z)), PE(18:1(11Z)/20:5(5Z,8Z,11Z,14Z,17Z)), PE(18:1(9Z)/20:5(5Z,8Z,11Z,14Z,17Z)), PE(18:2(9Z,12Z)/20:4(5Z,8Z,11Z,14Z)), PE(18:2(9Z,12Z)/20:4(8Z,11Z,14Z,17Z)), PE(18:3(6Z,9Z,12Z)/20:3(5Z,8Z,11Z)), PE(18:3(6Z,9Z,12Z)/20:3(8Z,11Z,14Z)), PE(18:3(9Z,12Z,15Z)/20:3(5Z,8Z,11Z)), PE(18:3(9Z,12Z,15…
77	C48H80NO8P	830.571	PC(18:2(9Z,12Z)/22:6(4Z,7Z,10Z,13Z,16Z,19Z)), PC(18:3(6Z,9Z,12Z)/22:5(4Z,7Z,10Z,13Z,16Z)), PC(18:3(6Z,9Z,12Z)/22:5(7Z,10Z,13Z,16Z,19Z)), PC(18:3(9Z,12Z,15Z)/22:5(4Z,7Z,10Z,13Z,16Z)), PC(18:3(9Z,12Z,15Z)/22:5(7Z,10Z,13Z,16Z,19Z)), PC(18:4(6Z,9Z,12Z,15Z)/22:4(7Z,10Z,13Z,16Z)), PC(20:3(5Z,8Z,11Z)/20:5(5Z,8Z,11Z,14Z,17Z)), PC(20:3(8Z,11Z,14Z)/20:5(5Z,8Z,11Z,14Z,17Z)), PC(20:4(5Z,8Z,11Z,14Z)/20:4(5Z,8…	Glycerophospholipids					C41H76NO8P	M+Na	764.52	PC(15:0/18:3(6Z,9Z,12Z)), PC(15:0/18:3(9Z,12Z,15Z)), PC(18:3(6Z,9Z,12Z)/15:0), PC(18:3(9Z,12Z,15Z)/15:0), PE(14:1(9Z)/22:2(13Z,16Z)), PE(16:0/20:3(5Z,8Z,11Z)), PE(16:0/20:3(8Z,11Z,14Z)), PE(16:1(9Z)/20:2(11Z,14Z)), PE(18:0/18:3(6Z,9Z,12Z)), PE(18:0/18:3(9Z,12Z,15Z)), PE(18:1(11Z)/18:2(9Z,12Z)), PE(18:1(9Z)/18:2(9Z,12Z)), PE(18:2(9Z,12Z)/18:1(11Z)), PE(18:2(9Z,12Z)/18:1(9Z)), PE(18:3(6Z,9Z,12Z)/18…
78	C48H82NO8P	832.587	PC(18:1(11Z)/22:6(4Z,7Z,10Z,13Z,16Z,19Z)), PC(18:1(9Z)/22:6(4Z,7Z,10Z,13Z,16Z,19Z)), PC(18:2(9Z,12Z)/22:5(4Z,7Z,10Z,13Z,16Z)), PC(18:2(9Z,12Z)/22:5(7Z,10Z,13Z,16Z,19Z)), PC(18:3(6Z,9Z,12Z)/22:4(7Z,10Z,13Z,16Z)), PC(18:3(9Z,12Z,15Z)/22:4(7Z,10Z,13Z,16Z)), PC(20:2(11Z,14Z)/20:5(5Z,8Z,11Z,14Z,17Z)), PC(20:3(5Z,8Z,11Z)/20:4(5Z,8Z,11Z,14Z)), PC(20:3(5Z,8Z,11Z)/20:4(8Z,11Z,14Z,17Z)), PC(20:3(8Z,11Z,14Z…	Glycerophospholipids					C41H71O8P	M+K	761.452	PA(16:0/22:5(4Z,7Z,10Z,13Z,16Z)), PA(16:0/22:5(7Z,10Z,13Z,16Z,19Z)), PA(16:1(9Z)/22:4(7Z,10Z,13Z,16Z)), PA(18:0/20:5(5Z,8Z,11Z,14Z,17Z)), PA(18:1(11Z)/20:4(5Z,8Z,11Z,14Z)), PA(18:1(11Z)/20:4(8Z,11Z,14Z,17Z)), PA(18:1(9Z)/20:4(5Z,8Z,11Z,14Z)), PA(18:1(9Z)/20:4(8Z,11Z,14Z,17Z)), PA(18:2(9Z,12Z)/20:3(5Z,8Z,11Z)), PA(18:4(6Z,9Z,12Z,15Z)/20:1(11Z)), PA(20:1(11Z)/18:4(6Z,9Z,12Z,15Z)), PA(20:3(5Z,8Z,11Z…
79	C48H84NO8P	834.602	PC(18:0/22:6(4Z,7Z,10Z,13Z,16Z,19Z)), PC(18:1(11Z)/22:5(4Z,7Z,10Z,13Z,16Z)), PC(18:1(11Z)/22:5(7Z,10Z,13Z,16Z,19Z)), PC(18:1(9Z)/22:5(4Z,7Z,10Z,13Z,16Z)), PC(18:1(9Z)/22:5(7Z,10Z,13Z,16Z,19Z)), PC(18:2(9Z,12Z)/22:4(7Z,10Z,13Z,16Z)), PC(18:4(6Z,9Z,12Z,15Z)/22:2(13Z,16Z)), PC(20:1(11Z)/20:5(5Z,8Z,11Z,14Z,17Z)), PC(20:2(11Z,14Z)/20:4(5Z,8Z,11Z,14Z)), PC(20:2(11Z,14Z)/20:4(8Z,11Z,14Z,17Z)), PC(20:3(5…	Glycerophospholipids					C42H82NO8P	M+H	760.585	PC(14:0/20:1(11Z)), PC(14:1(9Z)/20:0), PC(16:0/18:1(11Z)), PC(16:0/18:1(9Z)), PC(16:1(9Z)/18:0), PC(18:0/16:1(9Z)), PC(18:1(11Z)/16:0), PC(18:1(9Z)/16:0), PC(20:0/14:1(9Z)), PC(20:1(11Z)/14:0), PE(15:0/22:1(13Z)), PE(22:1(13Z)/15:0), PE-NMe(18:0/18:1(9Z)), PE-NMe(18:0/18:1(11Z)), PE-NMe(14:1(9Z)/22:0), PE-NMe(16:0/20:1(11Z)), PE-NMe(16:1(9Z)/20:0), PE-NMe(14:0/22:1(13Z)), PE-NMe(18:1(11Z)/18:0), …
80	C48H86NO8P	836.618	PC(18:0/22:5(4Z,7Z,10Z,13Z,16Z)), PC(18:0/22:5(7Z,10Z,13Z,16Z,19Z)), PC(18:1(11Z)/22:4(7Z,10Z,13Z,16Z)), PC(18:1(9Z)/22:4(7Z,10Z,13Z,16Z)), PC(18:3(6Z,9Z,12Z)/22:2(13Z,16Z)), PC(18:3(9Z,12Z,15Z)/22:2(13Z,16Z)), PC(18:4(6Z,9Z,12Z,15Z)/22:1(13Z)), PC(20:0/20:5(5Z,8Z,11Z,14Z,17Z)), PC(20:1(11Z)/20:4(5Z,8Z,11Z,14Z)), PC(20:1(11Z)/20:4(8Z,11Z,14Z,17Z)), PC(20:2(11Z,14Z)/20:3(5Z,8Z,11Z)), PC(20:2(11Z,1…	Glycerophospholipids					C42H80NO8P	M+H	758.569	PC(14:0/20:2(11Z,14Z)), PC(14:1(9Z)/20:1(11Z)), PC(16:0/18:2(9Z,12Z)), PC(16:1(9Z)/18:1(11Z)), PC(16:1(9Z)/18:1(9Z)), PC(18:1(11Z)/16:1(9Z)), PC(18:1(9Z)/16:1(9Z)), PC(18:2(9Z,12Z)/16:0), PC(20:1(11Z)/14:1(9Z)), PC(20:2(11Z,14Z)/14:0), PE(15:0/22:2(13Z,16Z)), PE(22:2(13Z,16Z)/15:0), PE-NMe(18:1(9Z)/18:1(9Z)), PE-NMe(16:1(9Z)/20:1(11Z)), PE-NMe(18:1(9Z)/18:1(11Z)), PE-NMe(18:1(11Z)/18:1(9Z)), PE-N…
81	C49H82NO8P	844.587	PE(22:2(13Z,16Z)/22:6(4Z,7Z,10Z,13Z,16Z,19Z)), PE(22:4(7Z,10Z,13Z,16Z)/22:4(7Z,10Z,13Z,16Z)), PE(22:6(4Z,7Z,10Z,13Z,16Z,19Z)/22:2(13Z,16Z)), PE-NMe2(20:2(11Z,14Z)/22:6(4Z,7Z,10Z,13Z,16Z,19Z)), PE-NMe2(20:3(5Z,8Z,11Z)/22:5(4Z,7Z,10Z,13Z,16Z)), PE-NMe2(20:3(5Z,8Z,11Z)/22:5(7Z,10Z,13Z,16Z,19Z)), PE-NMe2(20:3(8Z,11Z,14Z)/22:5(4Z,7Z,10Z,13Z,16Z)), PE-NMe2(20:4(5Z,8Z,11Z,14Z)/22:4(7Z,10Z,13Z,16Z)), PE-…	Glycerophospholipids					C42H78NO8P	M+H	756.554	PC(14:0/20:3(5Z,8Z,11Z)), PC(14:0/20:3(8Z,11Z,14Z)), PC(14:1(9Z)/20:2(11Z,14Z)), PC(16:0/18:3(6Z,9Z,12Z)), PC(16:0/18:3(9Z,12Z,15Z)), PC(16:1(9Z)/18:2(9Z,12Z)), PC(18:2(9Z,12Z)/16:1(9Z)), PC(18:3(6Z,9Z,12Z)/16:0), PC(18:3(9Z,12Z,15Z)/16:0), PC(20:2(11Z,14Z)/14:1(9Z)), PC(20:3(5Z,8Z,11Z)/14:0), PC(20:3(8Z,11Z,14Z)/14:0), PE-NMe(14:1(9Z)/22:2(13Z,16Z)), PE-NMe(16:0/20:3(5Z,8Z,11Z)), PE-NMe(16:0/20:…
82	C49H84NO8P	846.602	PE(22:1(13Z)/22:6(4Z,7Z,10Z,13Z,16Z,19Z)), PE(22:2(13Z,16Z)/22:5(4Z,7Z,10Z,13Z,16Z)), PE(22:2(13Z,16Z)/22:5(7Z,10Z,13Z,16Z,19Z)), PE(22:5(4Z,7Z,10Z,13Z,16Z)/22:2(13Z,16Z)), PE(22:5(7Z,10Z,13Z,16Z,19Z)/22:2(13Z,16Z)), PE(22:6(4Z,7Z,10Z,13Z,16Z,19Z)/22:1(13Z)), PE-NMe2(20:1(11Z)/22:6(4Z,7Z,10Z,13Z,16Z,19Z)), PE-NMe2(20:2(11Z,14Z)/22:5(4Z,7Z,10Z,13Z,16Z)), PE-NMe2(20:2(11Z,14Z)/22:5(7Z,10Z,13Z,16Z,1…	Glycerophospholipids					C42H76NO8P	M+H	754.538	PC(14:0/20:4(5Z,8Z,11Z,14Z)), PC(14:0/20:4(8Z,11Z,14Z,17Z)), PC(14:1(9Z)/20:3(5Z,8Z,11Z)), PC(14:1(9Z)/20:3(8Z,11Z,14Z)), PC(16:0/18:4(6Z,9Z,12Z,15Z)), PC(16:1(9Z)/18:3(6Z,9Z,12Z)), PC(16:1(9Z)/18:3(9Z,12Z,15Z)), PC(18:3(6Z,9Z,12Z)/16:1(9Z)), PC(18:3(9Z,12Z,15Z)/16:1(9Z)), PC(18:4(6Z,9Z,12Z,15Z)/16:0), PC(20:3(5Z,8Z,11Z)/14:1(9Z)), PC(20:3(8Z,11Z,14Z)/14:1(9Z)), PC(20:4(5Z,8Z,11Z,14Z)/14:0), PC(2…
83	C50H84NO8P	858.602	PC(20:2(11Z,14Z)/22:6(4Z,7Z,10Z,13Z,16Z,19Z)), PC(20:3(5Z,8Z,11Z)/22:5(4Z,7Z,10Z,13Z,16Z)), PC(20:3(5Z,8Z,11Z)/22:5(7Z,10Z,13Z,16Z,19Z)), PC(20:3(8Z,11Z,14Z)/22:5(4Z,7Z,10Z,13Z,16Z)), PC(20:3(8Z,11Z,14Z)/22:5(7Z,10Z,13Z,16Z,19Z)), PC(20:4(5Z,8Z,11Z,14Z)/22:4(7Z,10Z,13Z,16Z)), PC(20:4(8Z,11Z,14Z,17Z)/22:4(7Z,10Z,13Z,16Z)), PC(22:4(7Z,10Z,13Z,16Z)/20:4(5Z,8Z,11Z,14Z)), PC(22:4(7Z,10Z,13Z,16Z)/20:4(…	Glycerophospholipids					C39H74NO8P	M+K	754.478	PE(14:0/20:2(11Z,14Z)), PE(14:1(9Z)/20:1(11Z)), PE(16:0/18:2(9Z,12Z)), PE(16:1(9Z)/18:1(11Z)), PE(16:1(9Z)/18:1(9Z)), PE(18:1(11Z)/16:1(9Z)), PE(18:1(9Z)/16:1(9Z)), PE(18:2(9Z,12Z)/16:0), PE(20:1(11Z)/14:1(9Z)), PE(20:2(11Z,14Z)/14:0), PE-NMe(15:0/18:2(9Z,12Z)), PE-NMe(18:2(9Z,12Z)/15:0), PE-NMe2(14:1(9Z)/18:1(9Z)), PE-NMe2(14:1(9Z)/18:1(11Z)), PE-NMe2(16:1(9Z)/16:1(9Z)), PE-NMe2(14:0/18:2(9Z,12Z…
84	C55H100O6	895.717	TG(16:0/18:1(9Z)/18:2(9Z,12Z)), TG(16:1(9Z)/18:0/18:2(9Z,12Z)), TG(16:1(9Z)/16:1(9Z)/20:1(11Z)), TG(16:1(9Z)/18:1(9Z)/18:1(9Z)), TG(18:0/16:0/18:3(9Z,12Z,15Z)), TG(18:1(11Z)/16:0/18:2(9Z,12Z)), TG(18:1(11Z)/16:1(9Z)/18:1(11Z)), TG(18:1(11Z)/16:1(9Z)/18:1(9Z)), TG(14:0/18:0/20:3(5Z,8Z,11Z)), TG(14:0/18:0/20:3n6), TG(14:0/20:0/18:3(6Z,9Z,12Z)), TG(14:0/20:0/18:3(9Z,12Z,15Z)), TG(14:0/16:1(9Z)/22:2(…	Glycerolipids					C43H75O8P	M+H	751.527	PA(18:0/22:5(4Z,7Z,10Z,13Z,16Z)), PA(18:0/22:5(7Z,10Z,13Z,16Z,19Z)), PA(18:1(11Z)/22:4(7Z,10Z,13Z,16Z)), PA(18:1(9Z)/22:4(7Z,10Z,13Z,16Z)), PA(18:3(6Z,9Z,12Z)/22:2(13Z,16Z)), PA(18:3(9Z,12Z,15Z)/22:2(13Z,16Z)), PA(18:4(6Z,9Z,12Z,15Z)/22:1(13Z)), PA(20:0/20:5(5Z,8Z,11Z,14Z,17Z)), PA(20:1(11Z)/20:4(5Z,8Z,11Z,14Z)), PA(20:1(11Z)/20:4(8Z,11Z,14Z,17Z)), PA(20:4(5Z,8Z,11Z,14Z)/20:1(11Z)), PA(20:4(8Z,11…
85	C55H102O6	897.732	TG(16:0/18:0/18:2(9Z,12Z)), TG(16:0/16:1(9Z)/20:1(11Z)), TG(16:0/18:1(9Z)/18:1(9Z)), TG(16:1(9Z)/18:0/18:1(9Z)), TG(16:1(9Z)/16:1(9Z)/20:0), TG(16:1(9Z)/18:0/18:1(11Z)), TG(18:1(11Z)/16:0/18:1(11Z)), TG(18:1(11Z)/16:0/18:1(9Z)), Glycerol 2,3-di-(9Z-octadecenoate) 1-hexadecanoate, TG(14:0/16:0/22:2(13Z,16Z)), TG(14:0/18:0/20:2n6), TG(14:0/20:0/18:2(9Z,12Z)), TG(14:0/14:1(9Z)/24:1(15Z)), TG(14:0/16…	Glycerolipids					C41H75O8P	M+Na	749.509	PA(16:1(9Z)/22:2(13Z,16Z)), PA(18:0/20:3(5Z,8Z,11Z)), PA(18:2(9Z,12Z)/20:1(11Z)), PA(18:3(6Z,9Z,12Z)/20:0), PA(18:3(9Z,12Z,15Z)/20:0), PA(20:0/18:3(9Z,12Z,15Z)), PA(20:0/18:3(6Z,9Z,12Z)), PA(20:1(11Z)/18:2(9Z,12Z)), PA(20:3(5Z,8Z,11Z)/18:0), PA(22:2(13Z,16Z)/16:1(9Z)), PA(18:0/20:3(8Z,11Z,14Z)), PA(18:1(11Z)/20:2(11Z,14Z)), PA(18:1(9Z)/20:2(11Z,14Z)), PA(20:2(11Z,14Z)/18:1(11Z)), PA(20:2(11Z,14Z)…
									C43H71O8P	M+H	747.496	PA(18:1(11Z)/22:6(4Z,7Z,10Z,13Z,16Z,19Z)), PA(18:1(9Z)/22:6(4Z,7Z,10Z,13Z,16Z,19Z)), PA(18:2(9Z,12Z)/22:5(4Z,7Z,10Z,13Z,16Z)), PA(18:2(9Z,12Z)/22:5(7Z,10Z,13Z,16Z,19Z)), PA(18:3(6Z,9Z,12Z)/22:4(7Z,10Z,13Z,16Z)), PA(18:3(9Z,12Z,15Z)/22:4(7Z,10Z,13Z,16Z)), PA(20:3(5Z,8Z,11Z)/20:4(5Z,8Z,11Z,14Z)), PA(20:3(5Z,8Z,11Z)/20:4(8Z,11Z,14Z,17Z)), PA(20:4(5Z,8Z,11Z,14Z)/20:3(5Z,8Z,11Z)), PA(20:4(8Z,11Z,14Z,1…
									C41H71O8P	M+Na	745.478	PA(16:0/22:5(4Z,7Z,10Z,13Z,16Z)), PA(16:0/22:5(7Z,10Z,13Z,16Z,19Z)), PA(16:1(9Z)/22:4(7Z,10Z,13Z,16Z)), PA(18:0/20:5(5Z,8Z,11Z,14Z,17Z)), PA(18:1(11Z)/20:4(5Z,8Z,11Z,14Z)), PA(18:1(11Z)/20:4(8Z,11Z,14Z,17Z)), PA(18:1(9Z)/20:4(5Z,8Z,11Z,14Z)), PA(18:1(9Z)/20:4(8Z,11Z,14Z,17Z)), PA(18:2(9Z,12Z)/20:3(5Z,8Z,11Z)), PA(18:4(6Z,9Z,12Z,15Z)/20:1(11Z)), PA(20:1(11Z)/18:4(6Z,9Z,12Z,15Z)), PA(20:3(5Z,8Z,11Z…
									C41H76NO8P	M+H	742.538	PC(15:0/18:3(6Z,9Z,12Z)), PC(15:0/18:3(9Z,12Z,15Z)), PC(18:3(6Z,9Z,12Z)/15:0), PC(18:3(9Z,12Z,15Z)/15:0), PE(14:1(9Z)/22:2(13Z,16Z)), PE(16:0/20:3(5Z,8Z,11Z)), PE(16:0/20:3(8Z,11Z,14Z)), PE(16:1(9Z)/20:2(11Z,14Z)), PE(18:0/18:3(6Z,9Z,12Z)), PE(18:0/18:3(9Z,12Z,15Z)), PE(18:1(11Z)/18:2(9Z,12Z)), PE(18:1(9Z)/18:2(9Z,12Z)), PE(18:2(9Z,12Z)/18:1(11Z)), PE(18:2(9Z,12Z)/18:1(9Z)), PE(18:3(6Z,9Z,12Z)/18…
									C41H74NO8P	M+H	740.522	PC(15:0/18:4(6Z,9Z,12Z,15Z)), PC(18:4(6Z,9Z,12Z,15Z)/15:0), PE(14:0/22:4(7Z,10Z,13Z,16Z)), PE(16:0/20:4(5Z,8Z,11Z,14Z)), PE(16:0/20:4(8Z,11Z,14Z,17Z)), PE(16:1(9Z)/20:3(5Z,8Z,11Z)), PE(18:0/18:4(6Z,9Z,12Z,15Z)), PE(18:1(11Z)/18:3(6Z,9Z,12Z)), PE(18:1(11Z)/18:3(9Z,12Z,15Z)), PE(18:1(9Z)/18:3(6Z,9Z,12Z)), PE(18:1(9Z)/18:3(9Z,12Z,15Z)), PE(18:2(9Z,12Z)/18:2(9Z,12Z)), PE(18:3(6Z,9Z,12Z)/18:1(11Z)), P…
									C39H71O8P	M+K	737.452	PA(14:1(9Z)/22:2(13Z,16Z)), PA(16:0/20:3(5Z,8Z,11Z)), PA(18:0/18:3(6Z,9Z,12Z)), PA(18:0/18:3(9Z,12Z,15Z)), PA(18:1(11Z)/18:2(9Z,12Z)), PA(18:1(9Z)/18:2(9Z,12Z)), PA(18:2(9Z,12Z)/18:1(11Z)), PA(18:2(9Z,12Z)/18:1(9Z)), PA(18:3(6Z,9Z,12Z)/18:0), PA(18:3(9Z,12Z,15Z)/18:0), PA(20:3(5Z,8Z,11Z)/16:0), PA(22:2(13Z,16Z)/14:1(9Z)), PA(16:0/20:3(8Z,11Z,14Z)), PA(16:1(9Z)/20:2(11Z,14Z)), PA(20:2(11Z,14Z)/16:…
									C40H76NO8P	M+H	730.538	PC(14:0/18:2(9Z,12Z)), PC(14:1(9Z)/18:1(11Z)), PC(14:1(9Z)/18:1(9Z)), PC(16:1(9Z)/16:1(9Z)), PC(18:1(11Z)/14:1(9Z)), PC(18:1(9Z)/14:1(9Z)), PC(18:2(9Z,12Z)/14:0), PE(15:0/20:2(11Z,14Z)), PE(20:2(11Z,14Z)/15:0), PE-NMe(14:1(9Z)/20:1(11Z)), PE-NMe(16:1(9Z)/18:1(9Z)), PE-NMe(16:1(9Z)/18:1(11Z)), PE-NMe(14:0/20:2(11Z,14Z)), PE-NMe(16:0/18:2(9Z,12Z)), PE-NMe(18:1(9Z)/16:1(9Z)), PE-NMe(18:1(11Z)/16:1(9…
									C41H75O8P	M+H	727.527	PA(16:1(9Z)/22:2(13Z,16Z)), PA(18:0/20:3(5Z,8Z,11Z)), PA(18:2(9Z,12Z)/20:1(11Z)), PA(18:3(6Z,9Z,12Z)/20:0), PA(18:3(9Z,12Z,15Z)/20:0), PA(20:0/18:3(9Z,12Z,15Z)), PA(20:0/18:3(6Z,9Z,12Z)), PA(20:1(11Z)/18:2(9Z,12Z)), PA(20:3(5Z,8Z,11Z)/18:0), PA(22:2(13Z,16Z)/16:1(9Z)), PA(18:0/20:3(8Z,11Z,14Z)), PA(18:1(11Z)/20:2(11Z,14Z)), PA(18:1(9Z)/20:2(11Z,14Z)), PA(20:2(11Z,14Z)/18:1(11Z)), PA(20:2(11Z,14Z)…
									C41H71O8P	M+H	723.496	PA(16:0/22:5(4Z,7Z,10Z,13Z,16Z)), PA(16:0/22:5(7Z,10Z,13Z,16Z,19Z)), PA(16:1(9Z)/22:4(7Z,10Z,13Z,16Z)), PA(18:0/20:5(5Z,8Z,11Z,14Z,17Z)), PA(18:1(11Z)/20:4(5Z,8Z,11Z,14Z)), PA(18:1(11Z)/20:4(8Z,11Z,14Z,17Z)), PA(18:1(9Z)/20:4(5Z,8Z,11Z,14Z)), PA(18:1(9Z)/20:4(8Z,11Z,14Z,17Z)), PA(18:2(9Z,12Z)/20:3(5Z,8Z,11Z)), PA(18:4(6Z,9Z,12Z,15Z)/20:1(11Z)), PA(20:1(11Z)/18:4(6Z,9Z,12Z,15Z)), PA(20:3(5Z,8Z,11Z…
									C39H71O8P	M+Na	721.478	PA(14:1(9Z)/22:2(13Z,16Z)), PA(16:0/20:3(5Z,8Z,11Z)), PA(18:0/18:3(6Z,9Z,12Z)), PA(18:0/18:3(9Z,12Z,15Z)), PA(18:1(11Z)/18:2(9Z,12Z)), PA(18:1(9Z)/18:2(9Z,12Z)), PA(18:2(9Z,12Z)/18:1(11Z)), PA(18:2(9Z,12Z)/18:1(9Z)), PA(18:3(6Z,9Z,12Z)/18:0), PA(18:3(9Z,12Z,15Z)/18:0), PA(20:3(5Z,8Z,11Z)/16:0), PA(22:2(13Z,16Z)/14:1(9Z)), PA(16:0/20:3(8Z,11Z,14Z)), PA(16:1(9Z)/20:2(11Z,14Z)), PA(20:2(11Z,14Z)/16:…
									C39H76NO8P	M+H	718.538	PC(15:0/16:1(9Z)), PC(16:1(9Z)/15:0), PE(14:0/20:1(11Z)), PE(14:1(9Z)/20:0), PE(16:0/18:1(11Z)), PE(16:0/18:1(9Z)), PE(16:1(9Z)/18:0), PE(18:0/16:1(9Z)), PE(18:1(11Z)/16:0), PE(18:1(9Z)/16:0), PE(20:0/14:1(9Z)), PE(20:1(11Z)/14:0), PE-NMe(15:0/18:1(9Z)), PE-NMe(15:0/18:1(11Z)), PE-NMe(18:1(11Z)/15:0), PE-NMe(18:1(9Z)/15:0), PE-NMe2(16:0/16:1(9Z)), PE-NMe2(14:0/18:1(9Z)), PE-NMe2(14:0/18:1(11Z)), …
									C39H74NO8P	M+H	716.522	PE(14:0/20:2(11Z,14Z)), PE(14:1(9Z)/20:1(11Z)), PE(16:0/18:2(9Z,12Z)), PE(16:1(9Z)/18:1(11Z)), PE(16:1(9Z)/18:1(9Z)), PE(18:1(11Z)/16:1(9Z)), PE(18:1(9Z)/16:1(9Z)), PE(18:2(9Z,12Z)/16:0), PE(20:1(11Z)/14:1(9Z)), PE(20:2(11Z,14Z)/14:0), PE-NMe(15:0/18:2(9Z,12Z)), PE-NMe(18:2(9Z,12Z)/15:0), PE-NMe2(14:1(9Z)/18:1(9Z)), PE-NMe2(14:1(9Z)/18:1(11Z)), PE-NMe2(16:1(9Z)/16:1(9Z)), PE-NMe2(14:0/18:2(9Z,12Z…
									C39H71O8P	M+H	699.496	PA(14:1(9Z)/22:2(13Z,16Z)), PA(16:0/20:3(5Z,8Z,11Z)), PA(18:0/18:3(6Z,9Z,12Z)), PA(18:0/18:3(9Z,12Z,15Z)), PA(18:1(11Z)/18:2(9Z,12Z)), PA(18:1(9Z)/18:2(9Z,12Z)), PA(18:2(9Z,12Z)/18:1(11Z)), PA(18:2(9Z,12Z)/18:1(9Z)), PA(18:3(6Z,9Z,12Z)/18:0), PA(18:3(9Z,12Z,15Z)/18:0), PA(20:3(5Z,8Z,11Z)/16:0), PA(22:2(13Z,16Z)/14:1(9Z)), PA(16:0/20:3(8Z,11Z,14Z)), PA(16:1(9Z)/20:2(11Z,14Z)), PA(20:2(11Z,14Z)/16:…
									C41H72O5	M+K	683.501	DG(16:0/22:4(7Z,10Z,13Z,16Z)/0:0), DG(18:0/20:4(5Z,8Z,11Z,14Z)/0:0), DG(18:0/20:4(8Z,11Z,14Z,17Z)/0:0), DG(18:1(11Z)/20:3(8Z,11Z,14Z)/0:0), DG(18:1(9Z)/20:3(5Z,8Z,11Z)/0:0), DG(18:1(9Z)/20:3(8Z,11Z,14Z)/0:0), DG(18:2(9Z,12Z)/20:2(11Z,14Z)/0:0), DG(18:3(6Z,9Z,12Z)/20:1(11Z)/0:0), DG(18:3(9Z,12Z,15Z)/20:1(11Z)/0:0), DG(18:4(6Z,9Z,12Z,15Z)/20:0/0:0), DG(20:0/18:4(6Z,9Z,12Z,15Z)/0:0), DG(20:1(11Z)/18…
									C41H68O5	M+K	679.47	DG(16:0/22:6(4Z,7Z,10Z,13Z,16Z,19Z)/0:0), DG(16:1(9Z)/22:5(4Z,7Z,10Z,13Z,16Z)/0:0), DG(16:1(9Z)/22:5(7Z,10Z,13Z,16Z,19Z)/0:0), DG(18:1(11Z)/20:5(5Z,8Z,11Z,14Z,17Z)/0:0), DG(18:1(9Z)/20:5(5Z,8Z,11Z,14Z,17Z)/0:0), DG(18:2(9Z,12Z)/20:4(5Z,8Z,11Z,14Z)/0:0), DG(18:2(9Z,12Z)/20:4(8Z,11Z,14Z,17Z)/0:0), DG(18:3(6Z,9Z,12Z)/20:3(5Z,8Z,11Z)/0:0), DG(18:3(6Z,9Z,12Z)/20:3(8Z,11Z,14Z)/0:0), DG(18:3(9Z,12Z,15Z)…
									C41H72O5	M+Na	667.527	DG(16:0/22:4(7Z,10Z,13Z,16Z)/0:0), DG(18:0/20:4(5Z,8Z,11Z,14Z)/0:0), DG(18:0/20:4(8Z,11Z,14Z,17Z)/0:0), DG(18:1(11Z)/20:3(8Z,11Z,14Z)/0:0), DG(18:1(9Z)/20:3(5Z,8Z,11Z)/0:0), DG(18:1(9Z)/20:3(8Z,11Z,14Z)/0:0), DG(18:2(9Z,12Z)/20:2(11Z,14Z)/0:0), DG(18:3(6Z,9Z,12Z)/20:1(11Z)/0:0), DG(18:3(9Z,12Z,15Z)/20:1(11Z)/0:0), DG(18:4(6Z,9Z,12Z,15Z)/20:0/0:0), DG(20:0/18:4(6Z,9Z,12Z,15Z)/0:0), DG(20:1(11Z)/18…
									C39H72O5	M+K	659.501	DG(14:0/22:2(13Z,16Z)/0:0), DG(14:1(9Z)/22:1(13Z)/0:0), DG(16:0/20:2(11Z,14Z)/0:0), DG(16:1(9Z)/20:1(11Z)/0:0), DG(18:0/18:2(9Z,12Z)/0:0), DG(18:1(11Z)/18:1(11Z)/0:0), DG(18:1(11Z)/18:1(9Z)/0:0), DG(18:1(9Z)/18:1(11Z)/0:0), DG(18:1(9Z)/18:1(9Z)/0:0), DG(18:2(9Z,12Z)/18:0/0:0), DG(20:1(11Z)/16:1(9Z)/0:0), DG(20:2(11Z,14Z)/16:0/0:0), DG(22:1(13Z)/14:1(9Z)/0:0), DG(22:2(13Z,16Z)/14:0/0:0), DG(14:0/0…
									C39H70O5	M+K	657.485	DG(14:1(9Z)/22:2(13Z,16Z)/0:0), DG(16:0/20:3(5Z,8Z,11Z)/0:0), DG(16:0/20:3(8Z,11Z,14Z)/0:0), DG(16:1(9Z)/20:2(11Z,14Z)/0:0), DG(18:0/18:3(6Z,9Z,12Z)/0:0), DG(18:0/18:3(9Z,12Z,15Z)/0:0), DG(18:1(11Z)/18:2(9Z,12Z)/0:0), DG(18:1(9Z)/18:2(9Z,12Z)/0:0), DG(18:2(9Z,12Z)/18:1(11Z)/0:0), DG(18:2(9Z,12Z)/18:1(9Z)/0:0), DG(18:3(6Z,9Z,12Z)/18:0/0:0), DG(18:3(9Z,12Z,15Z)/18:0/0:0), DG(20:2(11Z,14Z)/16:1(9Z)/…
									C39H68O5	M+K	655.47	DG(14:0/22:4(7Z,10Z,13Z,16Z)/0:0), DG(16:0/20:4(5Z,8Z,11Z,14Z)/0:0), DG(16:0/20:4(8Z,11Z,14Z,17Z)/0:0), DG(16:1(9Z)/20:3(5Z,8Z,11Z)/0:0), DG(16:1(9Z)/20:3(8Z,11Z,14Z)/0:0), DG(18:0/18:4(6Z,9Z,12Z,15Z)/0:0), DG(18:1(11Z)/18:3(6Z,9Z,12Z)/0:0), DG(18:1(11Z)/18:3(9Z,12Z,15Z)/0:0), DG(18:1(9Z)/18:3(6Z,9Z,12Z)/0:0), DG(18:1(9Z)/18:3(9Z,12Z,15Z)/0:0), DG(18:2(9Z,12Z)/18:2(9Z,12Z)/0:0), DG(18:3(6Z,9Z,12Z…
									C42H83NO3	M+H	650.645	N-Lignoceroylsphingosine, Ceramide (d18:1/24:0), Cer(d18:0/24:1(15Z))
									C42H81NO3	M+H	648.629	Cer(d18:1/24:1(15Z))
									C41H72O5	M+H	645.545	DG(16:0/22:4(7Z,10Z,13Z,16Z)/0:0), DG(18:0/20:4(5Z,8Z,11Z,14Z)/0:0), DG(18:0/20:4(8Z,11Z,14Z,17Z)/0:0), DG(18:1(11Z)/20:3(8Z,11Z,14Z)/0:0), DG(18:1(9Z)/20:3(5Z,8Z,11Z)/0:0), DG(18:1(9Z)/20:3(8Z,11Z,14Z)/0:0), DG(18:2(9Z,12Z)/20:2(11Z,14Z)/0:0), DG(18:3(6Z,9Z,12Z)/20:1(11Z)/0:0), DG(18:3(9Z,12Z,15Z)/20:1(11Z)/0:0), DG(18:4(6Z,9Z,12Z,15Z)/20:0/0:0), DG(20:0/18:4(6Z,9Z,12Z,15Z)/0:0), DG(20:1(11Z)/18…
									C41H68O5	M+H	641.514	DG(16:0/22:6(4Z,7Z,10Z,13Z,16Z,19Z)/0:0), DG(16:1(9Z)/22:5(4Z,7Z,10Z,13Z,16Z)/0:0), DG(16:1(9Z)/22:5(7Z,10Z,13Z,16Z,19Z)/0:0), DG(18:1(11Z)/20:5(5Z,8Z,11Z,14Z,17Z)/0:0), DG(18:1(9Z)/20:5(5Z,8Z,11Z,14Z,17Z)/0:0), DG(18:2(9Z,12Z)/20:4(5Z,8Z,11Z,14Z)/0:0), DG(18:2(9Z,12Z)/20:4(8Z,11Z,14Z,17Z)/0:0), DG(18:3(6Z,9Z,12Z)/20:3(5Z,8Z,11Z)/0:0), DG(18:3(6Z,9Z,12Z)/20:3(8Z,11Z,14Z)/0:0), DG(18:3(9Z,12Z,15Z)…
									C39H68O5	M+Na	639.496	DG(14:0/22:4(7Z,10Z,13Z,16Z)/0:0), DG(16:0/20:4(5Z,8Z,11Z,14Z)/0:0), DG(16:0/20:4(8Z,11Z,14Z,17Z)/0:0), DG(16:1(9Z)/20:3(5Z,8Z,11Z)/0:0), DG(16:1(9Z)/20:3(8Z,11Z,14Z)/0:0), DG(18:0/18:4(6Z,9Z,12Z,15Z)/0:0), DG(18:1(11Z)/18:3(6Z,9Z,12Z)/0:0), DG(18:1(11Z)/18:3(9Z,12Z,15Z)/0:0), DG(18:1(9Z)/18:3(6Z,9Z,12Z)/0:0), DG(18:1(9Z)/18:3(9Z,12Z,15Z)/0:0), DG(18:2(9Z,12Z)/18:2(9Z,12Z)/0:0), DG(18:3(6Z,9Z,12Z…
									C41H81NO3	M+H	636.629	Cer(d18:1/23:0)
									C37H70O5	M+K	633.485	DG(14:0/20:1(11Z)/0:0), DG(14:1(9Z)/20:0/0:0), DG(16:0/18:1(11Z)/0:0), DG(16:0/18:1(9Z)/0:0), DG(16:1(9Z)/18:0/0:0), DG(18:0/16:1(9Z)/0:0), DG(18:1(11Z)/16:0/0:0), DG(18:1(9Z)/16:0/0:0), DG(20:0/14:1(9Z)/0:0), DG(20:1(11Z)/14:0/0:0), DG(16:0/0:0/18:1n7), DG(16:0/0:0/18:1n9), DG(18:0/0:0/16:1n7), DG(14:0/0:0/20:1n9), DG(20:0/0:0/14:1n5)
									C37H68O5	M+K	631.47	cis-Uvariamicin IB, DG(14:0/20:2(11Z,14Z)/0:0), DG(14:1(9Z)/20:1(11Z)/0:0), DG(16:0/18:2(9Z,12Z)/0:0), DG(16:1(9Z)/18:1(11Z)/0:0), DG(16:1(9Z)/18:1(9Z)/0:0), DG(18:1(11Z)/16:1(9Z)/0:0), DG(18:1(9Z)/16:1(9Z)/0:0), DG(18:2(9Z,12Z)/16:0/0:0), DG(20:1(11Z)/14:1(9Z)/0:0), DG(20:2(11Z,14Z)/14:0/0:0), Reticulatain 2, cis-Uvariamicin IV, Neoreticulatacin A, DG(14:0/0:0/20:2n6), DG(15:0/0:0/18:2n6), DG(14…
									C40H79NO3	M+H	622.613	Ceramide (d18:1/22:0), Cer(d18:0/22:1(13Z))
									C39H72O5	M+H	621.545	DG(14:0/22:2(13Z,16Z)/0:0), DG(14:1(9Z)/22:1(13Z)/0:0), DG(16:0/20:2(11Z,14Z)/0:0), DG(16:1(9Z)/20:1(11Z)/0:0), DG(18:0/18:2(9Z,12Z)/0:0), DG(18:1(11Z)/18:1(11Z)/0:0), DG(18:1(11Z)/18:1(9Z)/0:0), DG(18:1(9Z)/18:1(11Z)/0:0), DG(18:1(9Z)/18:1(9Z)/0:0), DG(18:2(9Z,12Z)/18:0/0:0), DG(20:1(11Z)/16:1(9Z)/0:0), DG(20:2(11Z,14Z)/16:0/0:0), DG(22:1(13Z)/14:1(9Z)/0:0), DG(22:2(13Z,16Z)/14:0/0:0), DG(14:0/0…
									C39H70O5	M+H	619.53	DG(14:1(9Z)/22:2(13Z,16Z)/0:0), DG(16:0/20:3(5Z,8Z,11Z)/0:0), DG(16:0/20:3(8Z,11Z,14Z)/0:0), DG(16:1(9Z)/20:2(11Z,14Z)/0:0), DG(18:0/18:3(6Z,9Z,12Z)/0:0), DG(18:0/18:3(9Z,12Z,15Z)/0:0), DG(18:1(11Z)/18:2(9Z,12Z)/0:0), DG(18:1(9Z)/18:2(9Z,12Z)/0:0), DG(18:2(9Z,12Z)/18:1(11Z)/0:0), DG(18:2(9Z,12Z)/18:1(9Z)/0:0), DG(18:3(6Z,9Z,12Z)/18:0/0:0), DG(18:3(9Z,12Z,15Z)/18:0/0:0), DG(20:2(11Z,14Z)/16:1(9Z)/…
									C39H68O5	M+H	617.514	DG(14:0/22:4(7Z,10Z,13Z,16Z)/0:0), DG(16:0/20:4(5Z,8Z,11Z,14Z)/0:0), DG(16:0/20:4(8Z,11Z,14Z,17Z)/0:0), DG(16:1(9Z)/20:3(5Z,8Z,11Z)/0:0), DG(16:1(9Z)/20:3(8Z,11Z,14Z)/0:0), DG(18:0/18:4(6Z,9Z,12Z,15Z)/0:0), DG(18:1(11Z)/18:3(6Z,9Z,12Z)/0:0), DG(18:1(11Z)/18:3(9Z,12Z,15Z)/0:0), DG(18:1(9Z)/18:3(6Z,9Z,12Z)/0:0), DG(18:1(9Z)/18:3(9Z,12Z,15Z)/0:0), DG(18:2(9Z,12Z)/18:2(9Z,12Z)/0:0), DG(18:3(6Z,9Z,12Z…
									C37H68O5	M+Na	615.496	cis-Uvariamicin IB, DG(14:0/20:2(11Z,14Z)/0:0), DG(14:1(9Z)/20:1(11Z)/0:0), DG(16:0/18:2(9Z,12Z)/0:0), DG(16:1(9Z)/18:1(11Z)/0:0), DG(16:1(9Z)/18:1(9Z)/0:0), DG(18:1(11Z)/16:1(9Z)/0:0), DG(18:1(9Z)/16:1(9Z)/0:0), DG(18:2(9Z,12Z)/16:0/0:0), DG(20:1(11Z)/14:1(9Z)/0:0), DG(20:2(11Z,14Z)/14:0/0:0), Reticulatain 2, cis-Uvariamicin IV, Neoreticulatacin A, DG(14:0/0:0/20:2n6), DG(15:0/0:0/18:2n6), DG(14…
									C30H50NO7P	M+K	606.296	LysoPC(22:6(4Z,7Z,10Z,13Z,16Z,19Z))
									C37H70O5	M+H	595.53	DG(14:0/20:1(11Z)/0:0), DG(14:1(9Z)/20:0/0:0), DG(16:0/18:1(11Z)/0:0), DG(16:0/18:1(9Z)/0:0), DG(16:1(9Z)/18:0/0:0), DG(18:0/16:1(9Z)/0:0), DG(18:1(11Z)/16:0/0:0), DG(18:1(9Z)/16:0/0:0), DG(20:0/14:1(9Z)/0:0), DG(20:1(11Z)/14:0/0:0), DG(16:0/0:0/18:1n7), DG(16:0/0:0/18:1n9), DG(18:0/0:0/16:1n7), DG(14:0/0:0/20:1n9), DG(20:0/0:0/14:1n5)
									C37H68O5	M+H	593.514	cis-Uvariamicin IB, DG(14:0/20:2(11Z,14Z)/0:0), DG(14:1(9Z)/20:1(11Z)/0:0), DG(16:0/18:2(9Z,12Z)/0:0), DG(16:1(9Z)/18:1(11Z)/0:0), DG(16:1(9Z)/18:1(9Z)/0:0), DG(18:1(11Z)/16:1(9Z)/0:0), DG(18:1(9Z)/16:1(9Z)/0:0), DG(18:2(9Z,12Z)/16:0/0:0), DG(20:1(11Z)/14:1(9Z)/0:0), DG(20:2(11Z,14Z)/14:0/0:0), Reticulatain 2, cis-Uvariamicin IV, Neoreticulatacin A, DG(14:0/0:0/20:2n6), DG(15:0/0:0/18:2n6), DG(14…
									C28H50NO7P	M+K	582.296	LysoPC(20:4(5Z,8Z,11Z,14Z)), LysoPC(20:4(8Z,11Z,14Z,17Z))
									C30H50NO7P	M+H	568.34	LysoPC(22:6(4Z,7Z,10Z,13Z,16Z,19Z))
									C28H50NO7P	M+Na	566.322	LysoPC(20:4(5Z,8Z,11Z,14Z)), LysoPC(20:4(8Z,11Z,14Z,17Z))
									C36H60O2	M+K	563.422	Retinyl palmitate, 11-cis-Retinyl palmitate
									C26H54NO7P	M+K	562.327	LysoPC(18:0), LysoPC(0:0/18:0), 2-acetyl-1-alkyl-sn-glycero-3-phosphocholine
									C26H50NO7P	M+K	558.296	LysoPC(18:2(9Z,12Z)), 2-linoleoyl-sn-glycero-3-phosphocholine
									C28H50NO7P	M+H	544.34	LysoPC(20:4(5Z,8Z,11Z,14Z)), LysoPC(20:4(8Z,11Z,14Z,17Z))
									C18H32O16	M+K	543.132	Galactotriose, Maltotriose, Raffinose, Levan, 3-Galactosyllactose, Dextrin, 1-Kestose, Melezitose, Neokestose, Gentiotriose, 6-O-Glucosylmaltose, beta-D-Fructofuranosyl alpha-D-glucopyranosyl-(1->4)-D-glucopyranoside, Panose, 6-Kestose, Umbelliferose, Gentianose, Fagopyritol B2, beta-D-Galactopyranosyl-(1->2)-[beta-D-galactopyranosyl-(1->4)]-D-galactose, beta-D-Galactopyranosyl-(1->4)-beta-D-gala…
									C34H67NO3	M+H	538.519	N-Palmitoylsphingosine, Ceramide (d18:1/16:0)
									C24H50NO7P	M+K	534.296	LysoPC(16:0)
									C18H32O16	M+Na	527.158	Galactotriose, Maltotriose, Raffinose, Levan, 3-Galactosyllactose, Dextrin, 1-Kestose, Melezitose, Neokestose, Gentiotriose, 6-O-Glucosylmaltose, beta-D-Fructofuranosyl alpha-D-glucopyranosyl-(1->4)-D-glucopyranoside, Panose, 6-Kestose, Umbelliferose, Gentianose, Fagopyritol B2, beta-D-Galactopyranosyl-(1->2)-[beta-D-galactopyranosyl-(1->4)]-D-galactose, beta-D-Galactopyranosyl-(1->4)-beta-D-gala…
									C36H60O2	M+H	525.467	Retinyl palmitate, 11-cis-Retinyl palmitate
									C26H54NO7P	M+H	524.371	LysoPC(18:0), LysoPC(0:0/18:0), 2-acetyl-1-alkyl-sn-glycero-3-phosphocholine
									C26H50NO7P	M+H	520.34	LysoPC(18:2(9Z,12Z)), 2-linoleoyl-sn-glycero-3-phosphocholine
									C24H50NO7P	M+Na	518.322	LysoPC(16:0)
									C29H47NO4	M+K	512.314	Docosa-4,7,10,13,16-pentaenoyl carnitine, Clupanodonyl carnitine, 23-Acetoxysoladulcidine
									C25H52NO7P	M+H	510.355	LysoPE(0:0/20:0), LysoPE(20:0/0:0), LysoPC(17:0)
									C25H50NO7P	M+H	508.34	LysoPE(0:0/20:1(11Z)), LysoPE(20:1(11Z)/0:0)
									C26H52NO6P	M+H	506.36	LysoPC(P-18:1(9Z))
									C23H45O7P	M+K	503.253	1-(11Z-eicosenoyl)-glycero-3-phosphate
									C24H50NO7P	M+H	496.34	LysoPC(16:0)
									C29H47NO4	M+Na	496.34	Docosa-4,7,10,13,16-pentaenoyl carnitine, Clupanodonyl carnitine, 23-Acetoxysoladulcidine
									C26H48O5	M+K	479.313	Momordol
									C23H45O7P	M+H	465.298	1-(11Z-eicosenoyl)-glycero-3-phosphate
									C25H47NO4	M+K	464.314	Oleoylcarnitine, Vaccenyl carnitine, Elaidic carnitine, 11Z-Octadecenylcarnitine, Octadecenoylcarnitine
									C26H42O4	M+K	457.271	11'-Carboxy-alpha-chromanol, Hexadecyl ferulate
									C27H45NO4	M+H	448.342	N-Stearoyl tyrosine
									C26H48O5	M+H	441.357	Momordol
									C26H42O4	M+Na	441.297	11'-Carboxy-alpha-chromanol, Hexadecyl ferulate
									C22H42O6	M+K	441.261	Sorbitan palmitate
									C23H43NO4	M+K	436.282	9-Hexadecenoylcarnitine, trans-Hexadec-2-enoyl carnitine
									C26H43NO4	M+H	434.326	Lithocholic acid glycine conjugate
									C24H38O4	M+K	429.24	12-Ketodeoxycholic acid, 7-Hydroxy-3-oxocholanoic acid, Nutriacholic acid, 7a-Hydroxy-3-oxo-5b-cholanoic acid, 9'-Carboxy-alpha-chromanol, D8'-Merulinic acid A, 12alpha-hydroxy-3-oxo-5beta-cholan-24-oic Acid
									C25H49NO4	M+H	428.373	Stearoylcarnitine, O-octadecanoyl-R-carnitine
									C25H47NO4	M+H	426.358	Oleoylcarnitine, Vaccenyl carnitine, Elaidic carnitine, 11Z-Octadecenylcarnitine, Octadecenoylcarnitine
									C22H42O6	M+Na	425.287	Sorbitan palmitate
									C25H45NO4	M+H	424.342	Linoelaidyl carnitine, Linoleyl carnitine
									C25H43NO4	M+H	422.326	Gamma-linolenyl carnitine, Alpha-linolenyl carnitine
									C23H42O4	M+K	421.271	MG(0:0/20:2(11Z,14Z)/0:0), MG(20:2(11Z,14Z)/0:0/0:0), Persenone B, Lepidiumterpenyl ester
									C26H42O4	M+H	419.316	11'-Carboxy-alpha-chromanol, Hexadecyl ferulate
									C22H42O7	M+H	419.3	Palmitoyl glucuronide
									C24H47NO4	M+H	414.358	Heptadecanoyl carnitine
									C24H38O4	M+Na	413.266	12-Ketodeoxycholic acid, 7-Hydroxy-3-oxocholanoic acid, Nutriacholic acid, 7a-Hydroxy-3-oxo-5b-cholanoic acid, 9'-Carboxy-alpha-chromanol, D8'-Merulinic acid A, 12alpha-hydroxy-3-oxo-5beta-cholan-24-oic Acid
									C22H42O4	M+K	409.271	Diethylhexyl adipate, Dioctyl hexanedioate
									C16H34O9	M+K	409.183	Octaethylene glycol
									C22H42O6	M+H	403.305	Sorbitan palmitate
									C23H36O4	M+Na	399.251	MG(0:0/20:5(5Z,8Z,11Z,14Z,17Z)/0:0), MG(20:5(5Z,8Z,11Z,14Z,17Z)/0:0/0:0), 9'-Carboxy-gamma-chromanol, [12]-Gingerdione
									C23H43NO4	M+H	398.326	9-Hexadecenoylcarnitine, trans-Hexadec-2-enoyl carnitine
									C21H38O4	M+K	393.24	MG(0:0/18:2(9Z,12Z)/0:0), MG(18:2(9Z,12Z)/0:0/0:0)
									C24H38O4	M+H	391.284	12-Ketodeoxycholic acid, 7-Hydroxy-3-oxocholanoic acid, Nutriacholic acid, 7a-Hydroxy-3-oxo-5b-cholanoic acid, 9'-Carboxy-alpha-chromanol, D8'-Merulinic acid A, 12alpha-hydroxy-3-oxo-5beta-cholan-24-oic Acid
									C27H46O	M+H	387.362	Cholesterol, 5alpha-Cholestanone, Lathosterol, 5a-Cholest-8-en-3b-ol, 5beta-Cholestanone, Doristerol, 5-beta-Cholestan-3-one, Cholesterol-ester-pool
									C23H42O4	M+H	383.316	MG(0:0/20:2(11Z,14Z)/0:0), MG(20:2(11Z,14Z)/0:0/0:0), Persenone B, Lepidiumterpenyl ester
									C21H42O4	M+Na	381.297	Glycerol 1-octadecanoate, MG(18:0/0:0/0:0), MG(0:0/18:0/0:0), MG(0:0/i-18:0/0:0), MG(i-18:0/0:0/0:0)
									C12H22O11	M+K	381.079	D-Maltose, Melibiose, Cellobiose, Alpha-Lactose, Sucrose, Lactulose, Trehalose, Isomaltose, Galactinol, 3-b-Galactopyranosyl glucose, Epimelibiose, Turanose, Kojibiose, Neotrehalose, Sakebiose, Inulobiose, Galabiose, Maltulose, Mannobiose, DEAE-cellulose, Allolactose, Glucinol, Trehalulose, Fagopyritol A1, beta-Lactose, Glucose-1,3-mannose oligosaccharide, 2-{[3,4-dihydroxy-2,5-bis(hydroxymethyl)…
									C23H36O4	M+H	377.269	MG(0:0/20:5(5Z,8Z,11Z,14Z,17Z)/0:0), MG(20:5(5Z,8Z,11Z,14Z,17Z)/0:0/0:0), 9'-Carboxy-gamma-chromanol, [12]-Gingerdione
									C21H38O4	M+Na	377.266	MG(0:0/18:2(9Z,12Z)/0:0), MG(18:2(9Z,12Z)/0:0/0:0)
									C21H41NO4	M+H	372.311	Tetradecanoylcarnitine
									C22H42O4	M+H	371.316	Diethylhexyl adipate, Dioctyl hexanedioate
									C16H34O9	M+H	371.228	Octaethylene glycol
									C14H30O8	M+K	365.157	Heptaethylene glycol
									C12H22O11	M+Na	365.105	D-Maltose, Melibiose, Cellobiose, Alpha-Lactose, Sucrose, Lactulose, Trehalose, Isomaltose, Galactinol, 3-b-Galactopyranosyl glucose, Epimelibiose, Turanose, Kojibiose, Neotrehalose, Sakebiose, Inulobiose, Galabiose, Maltulose, Mannobiose, DEAE-cellulose, Allolactose, Glucinol, Trehalulose, Fagopyritol A1, beta-Lactose, Glucose-1,3-mannose oligosaccharide, 2-{[3,4-dihydroxy-2,5-bis(hydroxymethyl)…
									C21H42O4	M+H	359.316	Glycerol 1-octadecanoate, MG(18:0/0:0/0:0), MG(0:0/18:0/0:0), MG(0:0/i-18:0/0:0), MG(i-18:0/0:0/0:0)
									C21H27NO4	M+H	358.201	Nalbuphine, (S)-Laudanosine, 5-hydroxypropafenone
									C21H38O4	M+H	355.284	MG(0:0/18:2(9Z,12Z)/0:0), MG(18:2(9Z,12Z)/0:0/0:0)
									C19H20O4	M+K	351.099	4-(3-Methyl-1-butenyl)-3,3',4',5-tetrahydroxystilbene, Honyudisin, 2',3,4',5-Tetrahydroxy-4-prenylstilbene, Gancaonin V, 2-[(1E)-3-hydroxy-3-methylbut-1-en-1-yl]-5-[(E)-2-(4-hydroxyphenyl)ethenyl]benzene-1,3-diol, 6-[(E)-2-(4-hydroxyphenyl)ethenyl]-3-[(1E)-3-methylbut-1-en-1-yl]benzene-1,2,4-triol, 5-[(E)-2-(2,4-dihydroxyphenyl)ethenyl]-2-[(1E)-3-methylbut-1-en-1-yl]benzene-1,3-diol, 5-[(E)-2-(3,…
									C22H39NO2	M+H	350.305	Dihomo-gamma-Linolenoyl ethanolamide
									C14H30O8	M+Na	349.183	Heptaethylene glycol
									C22H37NO2	M+H	348.29	Anandamide, O-Arachidonoyl Ethanolamine
									C22H35NO2	M+H	346.274	Eicosapentaenoyl Ethanolamide
									C18H13NO4	M+K	346.048	Hallacridone, Aristolodione
									C10H17N3O6S	M+K	346.047	Glutathione
									C20H32O2	M+K	343.203	ent-17-Hydroxy-16beta-kauran-19-al, Arachidonic acid, Cis-8,11,14,17-Eicosatetraenoic acid, Mesterolone, Drostanolone, Sideridiol, Yucalexin P21, Copalic acid, Junicedral, 7,13-Eperudien-15-oic acid, Oryzalexin S, Oryzalexin E
									C21H40O3	M+H	341.305	Polyoxyethylene (600) monoricinoleate
									C21H36O3	M+H	337.274	Pregnanetriol, 3-Methyl-5-pentyl-2-furanundecanoic acid, Isolinderanolide, 5-Hexyl-3,4-dimethyl-2-furannonanoic acid, 5-Butyl-3,4-dimethyl-2-furanundecanoic acid, 3,4-Dimethyl-5-propyl-2-furandodecanoic acid, 3-â€‹Methyl-â€‹5-â€‹propyl-2-â€‹furantridecanoic acid, 3,4-Dimethyl-5-pentyl-2-furandecanoic acid
									C16H24O5	M+K	335.125	Ovalicin, Methyl dihydrophaseate, 3,8-Dihydroxy-6-methoxy-7(11)-eremophilen-12,8-olide
									C19H20O4	M+Na	335.125	4-(3-Methyl-1-butenyl)-3,3',4',5-tetrahydroxystilbene, Honyudisin, 2',3,4',5-Tetrahydroxy-4-prenylstilbene, Gancaonin V, 2-[(1E)-3-hydroxy-3-methylbut-1-en-1-yl]-5-[(E)-2-(4-hydroxyphenyl)ethenyl]benzene-1,3-diol, 6-[(E)-2-(4-hydroxyphenyl)ethenyl]-3-[(1E)-3-methylbut-1-en-1-yl]benzene-1,2,4-triol, 5-[(E)-2-(2,4-dihydroxyphenyl)ethenyl]-2-[(1E)-3-methylbut-1-en-1-yl]benzene-1,3-diol, 5-[(E)-2-(3,…
									C18H13NO4	M+Na	330.074	Hallacridone, Aristolodione
									C10H17N3O6S	M+Na	330.073	Glutathione
									C14H30O8	M+H	327.201	Heptaethylene glycol
									C16H30O4	M+K	325.178	16-Hydroxy-10-oxohexadecanoic acid, Hexadecanedioic acid, 2,2,4-Trimethyl-1,3-pentadienol diisobutyrate
									C20H35NO2	M+H	322.274	Alpha-Linolenoyl ethanolamide
									C12H26O7	M+K	321.131	Hexaethylene glycol
									C18H32O2	M+K	319.203	Linoleic acid, Bovinic acid, 9E,11E-Octadecadienoic acid, 10E,12Z-Octadecadienoic acid, Linoelaidic acid, Mangiferic acid, Linalyl caprylate, Ethyl 2E,4Z-hexadecadienoate, 5-Octadecynoic acid, 6Z,9Z-octadecadienoic acid, Octadecadienoate
									C16H22O4	M+K	317.115	Alpha-CEHC, Diisobutyl phthalate, Monoethylhexyl phthalic acid, Dibutyl phthalate, bis(3-methylbut-2-en-1-yl)benzene-1,2,3,5-tetrol, 2-[(3,3-dimethyloxiran-2-yl)methyl]-4-(3-methylbut-2-en-1-yl)benzene-1,3,5-triol, 2-(4-hydroxy-3-methylbut-2-en-1-yl)-4-(3-methylbut-2-en-1-yl)benzene-1,3,5-triol, 4-(3,7-dimethylocta-2,6-dien-1-yl)benzene-1,2,3,5-tetrol, 2-{[3-methyl-3-(4-methylpent-3-en-1-yl)oxira…
									C12H20O7	M+K	315.084	Triethyl citrate
									C19H20O4	M+H	313.143	4-(3-Methyl-1-butenyl)-3,3',4',5-tetrahydroxystilbene, Honyudisin, 2',3,4',5-Tetrahydroxy-4-prenylstilbene, Gancaonin V, 2-[(1E)-3-hydroxy-3-methylbut-1-en-1-yl]-5-[(E)-2-(4-hydroxyphenyl)ethenyl]benzene-1,3-diol, 6-[(E)-2-(4-hydroxyphenyl)ethenyl]-3-[(1E)-3-methylbut-1-en-1-yl]benzene-1,2,4-triol, 5-[(E)-2-(2,4-dihydroxyphenyl)ethenyl]-2-[(1E)-3-methylbut-1-en-1-yl]benzene-1,3-diol, 5-[(E)-2-(3,…
									C16H30O4	M+Na	309.204	16-Hydroxy-10-oxohexadecanoic acid, Hexadecanedioic acid, 2,2,4-Trimethyl-1,3-pentadienol diisobutyrate
									C18H13NO4	M+H	308.092	Hallacridone, Aristolodione
									C10H17N3O6S	M+H	308.091	Glutathione
									C10H12N4O5	M+K	307.044	Inosine, Allopurinol riboside, Arabinosylhypoxanthine
									C20H32O2	M+H	305.247	ent-17-Hydroxy-16beta-kauran-19-al, Arachidonic acid, Cis-8,11,14,17-Eicosatetraenoic acid, Mesterolone, Drostanolone, Sideridiol, Yucalexin P21, Copalic acid, Junicedral, 7,13-Eperudien-15-oic acid, Oryzalexin S, Oryzalexin E
									C12H26O7	M+Na	305.157	Hexaethylene glycol
									C18H32O2	M+Na	303.229	Linoleic acid, Bovinic acid, 9E,11E-Octadecadienoic acid, 10E,12Z-Octadecadienoic acid, Linoelaidic acid, Mangiferic acid, Linalyl caprylate, Ethyl 2E,4Z-hexadecadienoate, 5-Octadecynoic acid, 6Z,9Z-octadecadienoic acid, Octadecadienoate
									C16H22O4	M+Na	301.141	Alpha-CEHC, Diisobutyl phthalate, Monoethylhexyl phthalic acid, Dibutyl phthalate, bis(3-methylbut-2-en-1-yl)benzene-1,2,3,5-tetrol, 2-[(3,3-dimethyloxiran-2-yl)methyl]-4-(3-methylbut-2-en-1-yl)benzene-1,3,5-triol, 2-(4-hydroxy-3-methylbut-2-en-1-yl)-4-(3-methylbut-2-en-1-yl)benzene-1,3,5-triol, 4-(3,7-dimethylocta-2,6-dien-1-yl)benzene-1,2,3,5-tetrol, 2-{[3-methyl-3-(4-methylpent-3-en-1-yl)oxira…
									C12H20O7	M+Na	299.11	Triethyl citrate
									C16H24O5	M+H	297.17	Ovalicin, Methyl dihydrophaseate, 3,8-Dihydroxy-6-methoxy-7(11)-eremophilen-12,8-olide
									C8H20NO6P	M+K	296.066	Glycerophosphocholine
									C10H12N4O5	M+Na	291.07	Inosine, Allopurinol riboside, Arabinosylhypoxanthine
									C15H22O4	M+Na	289.141	Humulinic acid A, Adhumulinic acid, Blennin D, Absindiol, (R)-Athanagrandione, Artemin, 10-Hydroxymyoporone, (6beta,8betaOH)-6,8-Dihydroxy-7(11)-eremophilen-12,8-olide, 3,14-Dihydroxy-11,13-dihydrocostunolide, Arlatin, 1alpha,15-Dihydroxymarasmene, 3alpha,15-Dihydroxymarasmene, Arabsin, Alkhanol, (1alpha,4alpha,5beta,6alpha,11betaH)-1,4-Epoxy-5-hydroxy-10(14)-germacren-12,6-olide, 1alpha-Hydroxya…
									C16H30O4	M+H	287.222	16-Hydroxy-10-oxohexadecanoic acid, Hexadecanedioic acid, 2,2,4-Trimethyl-1,3-pentadienol diisobutyrate
									C12H26O7	M+H	283.175	Hexaethylene glycol
									C18H32O2	M+H	281.247	Linoleic acid, Bovinic acid, 9E,11E-Octadecadienoic acid, 10E,12Z-Octadecadienoic acid, Linoelaidic acid, Mangiferic acid, Linalyl caprylate, Ethyl 2E,4Z-hexadecadienoate, 5-Octadecynoic acid, 6Z,9Z-octadecadienoic acid, Octadecadienoate
									C16H22O4	M+H	279.159	Alpha-CEHC, Diisobutyl phthalate, Monoethylhexyl phthalic acid, Dibutyl phthalate, bis(3-methylbut-2-en-1-yl)benzene-1,2,3,5-tetrol, 2-[(3,3-dimethyloxiran-2-yl)methyl]-4-(3-methylbut-2-en-1-yl)benzene-1,3,5-triol, 2-(4-hydroxy-3-methylbut-2-en-1-yl)-4-(3-methylbut-2-en-1-yl)benzene-1,3,5-triol, 4-(3,7-dimethylocta-2,6-dien-1-yl)benzene-1,2,3,5-tetrol, 2-{[3-methyl-3-(4-methylpent-3-en-1-yl)oxira…
									C20H28	M+H	269.226	anhydroretinol
									C10H12N4O5	M+H	269.088	Inosine, Allopurinol riboside, Arabinosylhypoxanthine
									C15H22O4	M+H	267.159	Humulinic acid A, Adhumulinic acid, Blennin D, Absindiol, (R)-Athanagrandione, Artemin, 10-Hydroxymyoporone, (6beta,8betaOH)-6,8-Dihydroxy-7(11)-eremophilen-12,8-olide, 3,14-Dihydroxy-11,13-dihydrocostunolide, Arlatin, 1alpha,15-Dihydroxymarasmene, 3alpha,15-Dihydroxymarasmene, Arabsin, Alkhanol, (1alpha,4alpha,5beta,6alpha,11betaH)-1,4-Epoxy-5-hydroxy-10(14)-germacren-12,6-olide, 1alpha-Hydroxya…
									C8H20NO6P	M+H	258.11	Glycerophosphocholine
